# Supplementary material for: Novel Role of JAC1 in Influencing Photosynthesis, Stomatal Conductance, and Photooxidative Stress Signalling Pathway in Arabidopsis thaliana
Source: Front Plant Sci. 2020 Jul 29;11:1124. doi: 10.3389/fpls.2020.01124 (PMC7403226; doi:10.3389/fpls.2020.01124)
Supplement: Supplementary file 5 [file DataSheet_5.xlsx]

## Sheet: Cellular component
GO Term	p-value	Genes	GO Term	Matches
cell wall	0.019130948612874902	AT1G16150,AT1G20620,AT1G21670,AT1G23200,AT1G26380,AT1G26420,AT1G30720,AT1G30730,AT1G53830,AT1G62440,AT1G65310,AT2G02130,AT2G03090,AT2G15880,AT2G16570,AT2G20870,AT2G43050,AT3G13750,AT3G15720,AT3G22060,AT3G23730,AT3G44990,AT3G55500,AT3G57200,AT3G57260,AT4G11310,AT4G14130,AT4G16563,AT4G20860,AT4G27580,AT4G30290,AT5G20630,AT5G20710,AT5G39580,AT5G41900,AT5G44130,AT5G49360,AT5G56870,AT5G63800	GO:0005618	39
external encapsulating structure	0.019884839017867372	AT1G16150,AT1G20620,AT1G21670,AT1G23200,AT1G26380,AT1G26420,AT1G30720,AT1G30730,AT1G53830,AT1G62440,AT1G65310,AT2G02130,AT2G03090,AT2G15880,AT2G16570,AT2G20870,AT2G43050,AT3G13750,AT3G15720,AT3G22060,AT3G23730,AT3G44990,AT3G55500,AT3G57200,AT3G57260,AT4G11310,AT4G14130,AT4G16563,AT4G20860,AT4G27580,AT4G30290,AT5G20630,AT5G20710,AT5G39580,AT5G41900,AT5G44130,AT5G49360,AT5G56870,AT5G63800	GO:0030312	39
photosystem	0.0003317110547836934	AT1G29910,AT1G29920,AT1G61520,AT2G05070,AT2G34430,AT3G01440,AT3G08940,AT3G27690,AT3G47470,AT3G54890,AT4G14690,AT5G54270	GO:0009521	12
extracellular space	0.04478886625936185	AT2G17230,AT2G27420,AT2G34925,AT3G19390,AT3G28455,AT4G11310,AT4G24230,AT4G25780,AT4G30610,AT4G39090,AT5G09440,AT5G66590	GO:0005615	12
integral component of plasma membrane	0.04960866084587995	AT1G08890,AT1G11260,AT1G77210,AT3G14770,AT3G20460,AT3G51490,AT4G36670,AT5G23660,AT5G26340,AT5G50790,AT5G51060,AT5G60780	GO:0005887	12
photosystem I	5.303471076737793e-7	AT1G29910,AT1G29920,AT1G61520,AT2G05070,AT2G34430,AT3G08940,AT3G27690,AT3G47470,AT3G54890,AT4G14690,AT5G54270	GO:0009522	11
plastoglobule	0.00016636728917207778	AT1G29910,AT1G29920,AT1G61520,AT2G05070,AT2G34430,AT3G08940,AT3G27690,AT3G47470,AT3G54890,AT4G19170,AT5G54270	GO:0010287	11
photosystem II	0.00041464799940970915	AT1G29910,AT1G29920,AT2G05070,AT2G34430,AT3G01440,AT3G08940,AT3G27690,AT3G54890,AT4G14690,AT5G54270	GO:0009523	10
monolayer-surrounded lipid storage body	0.00731665017406967	AT2G33380,AT5G04040,AT5G07560,AT5G56100	GO:0012511	4
chloroplast thylakoid membrane protein complex	0.010196420495160383	AT2G05070,AT3G26740,AT3G27690,AT5G54270	GO:0098807	4
mitochondrial alpha-ketoglutarate dehydrogenase complex	0.0005117562331492907	AT1G21400,AT5G09300,AT5G34780	GO:0005947	3
mitochondrial tricarboxylic acid cycle enzyme complex	0.0005117562331492907	AT1G21400,AT5G09300,AT5G34780	GO:0030062	3
thylakoid light-harvesting complex	0.0016915844940356905	AT2G05070,AT3G27690,AT5G54270	GO:0009503	3
PSII associated light-harvesting complex II	0.0016915844940356905	AT2G05070,AT3G27690,AT5G54270	GO:0009517	3
light-harvesting complex	0.0016915844940356905	AT2G05070,AT3G27690,AT5G54270	GO:0030076	3
dihydrolipoyl dehydrogenase complex	0.0038350073354664577	AT1G21400,AT5G09300,AT5G34780	GO:0045240	3
tricarboxylic acid cycle enzyme complex	0.009225489778591382	AT1G21400,AT5G09300,AT5G34780	GO:0045239	3
vacuolar lumen	0.013282571031331994	AT1G12240,AT1G62660	GO:0005775	2
central vacuole	0.01942654089066391	AT4G17340,AT5G47450	GO:0042807	2
TIM22 mitochondrial import inner membrane insertion complex	0.03448387756218538	AT1G18320,AT3G10110	GO:0042721	2
calcineurin complex	0.03788206600841827	AT5G24270	GO:0005955	1
cis-Golgi network membrane	0.03788206600841827	AT5G59220	GO:0033106	1

## Sheet: Biological process
GO Term	p-value	Genes	GO Term	Matches
response to stimulus	2.8363753147501686e-17	AT1G01470,AT1G02450,AT1G02660,AT1G03610,AT1G03800,AT1G03850,AT1G04310,AT1G06160,AT1G06830,AT1G09080,AT1G09350,AT1G09570,AT1G10140,AT1G10370,AT1G11210,AT1G12070,AT1G12240,AT1G12480,AT1G13300,AT1G13340,AT1G13609,AT1G13635,AT1G13930,AT1G14780,AT1G15010,AT1G16150,AT1G16850,AT1G18200,AT1G18330,AT1G19530,AT1G19610,AT1G20440,AT1G20450,AT1G20530,AT1G20620,AT1G20650,AT1G21400,AT1G21550,AT1G22070,AT1G22500…	GO:0050896	358
response to chemical	3.643990054860353e-25	AT1G01470,AT1G03610,AT1G03800,AT1G03850,AT1G04310,AT1G06160,AT1G09080,AT1G09570,AT1G10140,AT1G10370,AT1G12240,AT1G12480,AT1G13300,AT1G13930,AT1G15010,AT1G16150,AT1G18330,AT1G19530,AT1G20440,AT1G20450,AT1G20530,AT1G20620,AT1G21400,AT1G21550,AT1G22070,AT1G22500,AT1G22530,AT1G22770,AT1G26380,AT1G26800,AT1G29395,AT1G29460,AT1G29910,AT1G29920,AT1G30260,AT1G30720,AT1G33055,AT1G37130,AT1G43910,AT1G47510…	GO:0042221	232
response to stress	3.0557473332722022e-9	AT1G01470,AT1G02450,AT1G02660,AT1G03610,AT1G03850,AT1G06160,AT1G06830,AT1G09080,AT1G09350,AT1G10140,AT1G10370,AT1G11210,AT1G12480,AT1G13300,AT1G13340,AT1G13609,AT1G13635,AT1G13930,AT1G14780,AT1G15010,AT1G16850,AT1G18330,AT1G19530,AT1G19610,AT1G20440,AT1G20450,AT1G20620,AT1G20650,AT1G21400,AT1G21550,AT1G22070,AT1G22770,AT1G23870,AT1G26380,AT1G26800,AT1G29395,AT1G30720,AT1G33055,AT1G33970,AT1G37130…	GO:0006950	219
response to abiotic stimulus	5.43964029821597e-19	AT1G01470,AT1G02660,AT1G03610,AT1G09080,AT1G09350,AT1G09570,AT1G10140,AT1G10370,AT1G12480,AT1G13300,AT1G13930,AT1G15010,AT1G16850,AT1G18330,AT1G19530,AT1G20440,AT1G20450,AT1G20620,AT1G21400,AT1G21550,AT1G22500,AT1G22770,AT1G26380,AT1G26800,AT1G26945,AT1G29395,AT1G29910,AT1G29920,AT1G30720,AT1G33055,AT1G37130,AT1G47510,AT1G52890,AT1G54100,AT1G56600,AT1G61520,AT1G62660,AT1G64660,AT1G71030,AT1G74840…	GO:0009628	177
response to organic substance	3.8367372087004096e-18	AT1G03800,AT1G03850,AT1G04310,AT1G06160,AT1G09080,AT1G10370,AT1G12240,AT1G12480,AT1G13300,AT1G18330,AT1G20440,AT1G20450,AT1G21400,AT1G22070,AT1G22500,AT1G22530,AT1G26800,AT1G29395,AT1G29460,AT1G29910,AT1G29920,AT1G30260,AT1G43910,AT1G47510,AT1G49900,AT1G53230,AT1G54100,AT1G56600,AT1G62660,AT1G65790,AT1G68550,AT1G69260,AT1G71030,AT1G74840,AT1G76180,AT1G76530,AT1G77200,AT1G79680,AT1G80460,AT2G01520…	GO:0010033	162
cellular response to stimulus	0.027124171169049492	AT1G03610,AT1G03800,AT1G04310,AT1G06160,AT1G06830,AT1G09080,AT1G09570,AT1G10140,AT1G12070,AT1G12240,AT1G12480,AT1G13300,AT1G13635,AT1G14780,AT1G15010,AT1G18200,AT1G19530,AT1G20530,AT1G20620,AT1G21400,AT1G21550,AT1G22070,AT1G22530,AT1G22770,AT1G23870,AT1G26380,AT1G26800,AT1G29395,AT1G29460,AT1G30720,AT1G33055,AT1G43910,AT1G58190,AT1G60140,AT1G62660,AT1G64660,AT1G65790,AT1G65970,AT1G68550,AT1G69260…	GO:0051716	160
response to oxygen-containing compound	9.695635950423359e-16	AT1G01470,AT1G06160,AT1G10370,AT1G12240,AT1G12480,AT1G13300,AT1G20440,AT1G20450,AT1G20530,AT1G20620,AT1G21400,AT1G22070,AT1G22500,AT1G22770,AT1G29395,AT1G29910,AT1G29920,AT1G43910,AT1G47510,AT1G49900,AT1G52890,AT1G54100,AT1G56600,AT1G62660,AT1G64660,AT1G65790,AT1G69260,AT1G71030,AT1G74840,AT1G76180,AT1G79680,AT2G03500,AT2G05070,AT2G17770,AT2G17840,AT2G19450,AT2G20880,AT2G21660,AT2G23950,AT2G24850…	GO:1901700	141
response to endogenous stimulus	2.001111681592397e-15	AT1G03800,AT1G03850,AT1G04310,AT1G06160,AT1G10370,AT1G12240,AT1G12480,AT1G18330,AT1G20440,AT1G20450,AT1G22070,AT1G22530,AT1G29395,AT1G29460,AT1G30260,AT1G43910,AT1G47510,AT1G53230,AT1G54100,AT1G56600,AT1G62660,AT1G65790,AT1G68550,AT1G69260,AT1G71030,AT1G74840,AT1G76180,AT1G76530,AT1G77200,AT1G79680,AT2G03500,AT2G05070,AT2G17840,AT2G19450,AT2G20880,AT2G23950,AT2G24850,AT2G26710,AT2G26980,AT2G31730…	GO:0009719	136
response to hormone	7.381379260174783e-16	AT1G03800,AT1G03850,AT1G04310,AT1G06160,AT1G10370,AT1G12240,AT1G12480,AT1G18330,AT1G20440,AT1G20450,AT1G22070,AT1G22530,AT1G29395,AT1G29460,AT1G30260,AT1G43910,AT1G47510,AT1G53230,AT1G54100,AT1G56600,AT1G62660,AT1G65790,AT1G68550,AT1G69260,AT1G71030,AT1G74840,AT1G76180,AT1G76530,AT1G77200,AT1G79680,AT2G03500,AT2G05070,AT2G17840,AT2G19450,AT2G20880,AT2G24850,AT2G26710,AT2G26980,AT2G31730,AT2G32800…	GO:0009725	135
response to acid chemical	1.659467258731904e-13	AT1G01470,AT1G06160,AT1G10370,AT1G12240,AT1G12480,AT1G20440,AT1G20450,AT1G20530,AT1G22070,AT1G22500,AT1G29395,AT1G43910,AT1G47510,AT1G52890,AT1G54100,AT1G56600,AT1G62660,AT1G64660,AT1G65790,AT1G69260,AT1G71030,AT1G74840,AT1G76180,AT1G79680,AT2G03500,AT2G05070,AT2G17840,AT2G19450,AT2G20880,AT2G21660,AT2G24850,AT2G26980,AT2G31730,AT2G32800,AT2G33380,AT2G36270,AT2G37170,AT2G37180,AT2G37770,AT2G38310…	GO:0001101	112
response to external stimulus	0.019488642883073927	AT1G01470,AT1G02450,AT1G02660,AT1G03850,AT1G06160,AT1G06830,AT1G09570,AT1G12240,AT1G13300,AT1G13609,AT1G14780,AT1G15010,AT1G19610,AT1G20440,AT1G20620,AT1G21400,AT1G22070,AT1G22500,AT1G22770,AT1G29395,AT1G33960,AT1G33970,AT1G37130,AT1G43910,AT1G47395,AT1G47400,AT1G51890,AT1G61390,AT1G62660,AT1G64660,AT1G69480,AT1G79680,AT1G80460,AT2G02130,AT2G02930,AT2G15890,AT2G19190,AT2G21650,AT2G21660,AT2G23560…	GO:0009605	109
cellular response to chemical stimulus	0.00004612316744573571	AT1G03610,AT1G03800,AT1G04310,AT1G06160,AT1G09080,AT1G10140,AT1G12240,AT1G12480,AT1G13300,AT1G15010,AT1G19530,AT1G20530,AT1G21550,AT1G22070,AT1G22530,AT1G26380,AT1G26800,AT1G29395,AT1G29460,AT1G30720,AT1G33055,AT1G62660,AT1G64660,AT1G65790,AT1G65970,AT1G68550,AT1G69260,AT1G76530,AT1G77200,AT2G03500,AT2G05070,AT2G15890,AT2G20880,AT2G23950,AT2G26560,AT2G26980,AT2G32800,AT2G36270,AT2G38310,AT2G40330…	GO:0070887	101
response to inorganic substance	6.620769575617153e-7	AT1G01470,AT1G10370,AT1G12480,AT1G13930,AT1G16150,AT1G18330,AT1G20440,AT1G20450,AT1G20530,AT1G20620,AT1G22770,AT1G29395,AT1G52827,AT1G52890,AT1G54100,AT1G56600,AT1G62660,AT1G64660,AT1G71030,AT1G74840,AT1G76180,AT2G01520,AT2G05070,AT2G17840,AT2G20880,AT2G21660,AT2G26560,AT2G33380,AT2G36270,AT2G37170,AT2G37180,AT2G37770,AT2G39800,AT2G41870,AT2G42540,AT2G46680,AT2G47190,AT3G04070,AT3G05640,AT3G12750…	GO:0010035	79
response to lipid	1.3983456964146558e-10	AT1G12240,AT1G12480,AT1G20440,AT1G20450,AT1G29395,AT1G43910,AT1G47510,AT1G54100,AT1G56600,AT1G62660,AT1G65790,AT1G69260,AT1G71030,AT1G74840,AT1G76180,AT2G03500,AT2G05070,AT2G17840,AT2G19450,AT2G26710,AT2G26980,AT2G31730,AT2G33380,AT2G36270,AT2G37170,AT2G38310,AT2G39800,AT2G40330,AT2G41870,AT2G42540,AT2G42870,AT2G46680,AT2G47190,AT3G02410,AT3G08040,AT3G17510,AT3G22060,AT3G27690,AT3G29575,AT3G47860…	GO:0033993	77
response to alcohol	2.5324164769289734e-11	AT1G12240,AT1G12480,AT1G13300,AT1G20440,AT1G20450,AT1G29395,AT1G43910,AT1G47510,AT1G54100,AT1G56600,AT1G62660,AT1G65790,AT1G69260,AT1G71030,AT1G74840,AT1G76180,AT2G05070,AT2G17840,AT2G19450,AT2G26980,AT2G33380,AT2G36270,AT2G37170,AT2G38310,AT2G39800,AT2G40330,AT2G41870,AT2G42540,AT2G46680,AT2G47190,AT3G02410,AT3G08040,AT3G17510,AT3G22060,AT3G27690,AT3G29575,AT3G47860,AT3G48360,AT3G50970,AT3G55610…	GO:0097305	68
response to abscisic acid	2.1993628079660062e-12	AT1G12240,AT1G12480,AT1G20440,AT1G20450,AT1G29395,AT1G43910,AT1G47510,AT1G54100,AT1G56600,AT1G62660,AT1G65790,AT1G69260,AT1G71030,AT1G74840,AT1G76180,AT2G05070,AT2G17840,AT2G19450,AT2G26980,AT2G33380,AT2G36270,AT2G37170,AT2G38310,AT2G39800,AT2G40330,AT2G41870,AT2G42540,AT2G46680,AT2G47190,AT3G02410,AT3G08040,AT3G17510,AT3G22060,AT3G27690,AT3G29575,AT3G47860,AT3G48360,AT3G50970,AT3G55610,AT3G61890…	GO:0009737	67
response to light stimulus	0.00004423771459573236	AT1G01470,AT1G09570,AT1G10370,AT1G12480,AT1G20620,AT1G21400,AT1G22500,AT1G22770,AT1G26945,AT1G29910,AT1G29920,AT1G37130,AT1G61520,AT1G77760,AT1G79440,AT1G80920,AT2G03500,AT2G05070,AT2G17770,AT2G17840,AT2G21650,AT2G26710,AT2G34430,AT2G42540,AT2G42870,AT2G43010,AT2G46790,AT2G46970,AT3G03830,AT3G07650,AT3G08940,AT3G27690,AT3G47340,AT3G47470,AT3G47860,AT3G48390,AT3G54890,AT3G59060,AT3G60530,AT4G14130…	GO:0009416	63
response to radiation	0.00013861011199802474	AT1G01470,AT1G09570,AT1G10370,AT1G12480,AT1G20620,AT1G21400,AT1G22500,AT1G22770,AT1G26945,AT1G29910,AT1G29920,AT1G37130,AT1G61520,AT1G77760,AT1G79440,AT1G80920,AT2G03500,AT2G05070,AT2G17770,AT2G17840,AT2G21650,AT2G26710,AT2G34430,AT2G42540,AT2G42870,AT2G43010,AT2G46790,AT2G46970,AT3G03830,AT3G07650,AT3G08940,AT3G27690,AT3G47340,AT3G47470,AT3G47860,AT3G48390,AT3G54890,AT3G59060,AT3G60530,AT4G14130…	GO:0009314	63
response to osmotic stress	0.00000730949719607823	AT1G10370,AT1G13930,AT1G16850,AT1G18330,AT1G20440,AT1G47510,AT1G54100,AT1G56600,AT1G62660,AT1G71030,AT1G74840,AT2G17840,AT2G19450,AT2G20880,AT2G21660,AT2G23030,AT2G30250,AT2G33380,AT2G36270,AT2G37180,AT2G37770,AT2G39800,AT2G41870,AT2G42540,AT2G44480,AT2G47190,AT3G03640,AT3G17510,AT3G48360,AT3G55610,AT3G61890,AT4G04330,AT4G05100,AT4G11890,AT4G21440,AT4G21870,AT4G34000,AT4G39090,AT5G01520,AT5G02020…	GO:0006970	54
response to water	8.081688218253535e-10	AT1G01470,AT1G10370,AT1G12480,AT1G20440,AT1G20450,AT1G29395,AT1G52890,AT1G54100,AT1G56600,AT1G62660,AT1G64660,AT1G76180,AT2G05070,AT2G17840,AT2G20880,AT2G21660,AT2G33380,AT2G36270,AT2G37170,AT2G37180,AT2G37770,AT2G39800,AT2G41870,AT2G42540,AT2G46680,AT2G47190,AT3G04070,AT3G05640,AT3G15500,AT3G16800,AT3G27690,AT3G28455,AT3G47860,AT3G50970,AT3G61430,AT3G61890,AT4G04330,AT4G11890,AT4G23450,AT4G27410…	GO:0009415	50
response to temperature stimulus	0.0022715918683235566	AT1G09080,AT1G09350,AT1G13930,AT1G20440,AT1G20450,AT1G20620,AT1G22770,AT1G29395,AT1G56600,AT1G61520,AT1G76180,AT1G79440,AT2G03500,AT2G05070,AT2G17840,AT2G19450,AT2G20880,AT2G21660,AT2G30250,AT2G33380,AT2G37770,AT2G42540,AT2G46790,AT3G27690,AT3G47470,AT3G47860,AT3G48360,AT3G50260,AT3G50970,AT3G54890,AT3G57260,AT4G02520,AT4G04330,AT4G11890,AT4G14690,AT4G21870,AT4G33980,AT4G38410,AT4G38580,AT5G02810…	GO:0009266	50
response to salt stress	0.000008891889530510433	AT1G10370,AT1G13930,AT1G16850,AT1G18330,AT1G47510,AT1G54100,AT1G56600,AT1G62660,AT1G71030,AT1G74840,AT2G17840,AT2G19450,AT2G20880,AT2G21660,AT2G30250,AT2G33380,AT2G36270,AT2G37770,AT2G39800,AT2G41870,AT2G42540,AT2G44480,AT2G47190,AT3G03640,AT3G17510,AT3G48360,AT3G55610,AT3G61890,AT4G04330,AT4G05100,AT4G11890,AT4G21440,AT4G21870,AT4G34000,AT4G39090,AT5G01520,AT5G02020,AT5G22270,AT5G24270,AT5G24660…	GO:0009651	49
response to water deprivation	5.542310291952377e-9	AT1G01470,AT1G10370,AT1G20440,AT1G20450,AT1G29395,AT1G52890,AT1G54100,AT1G56600,AT1G62660,AT1G64660,AT1G76180,AT2G05070,AT2G17840,AT2G20880,AT2G21660,AT2G33380,AT2G36270,AT2G37170,AT2G37180,AT2G37770,AT2G39800,AT2G41870,AT2G42540,AT2G46680,AT2G47190,AT3G05640,AT3G15500,AT3G16800,AT3G27690,AT3G28455,AT3G47860,AT3G50970,AT3G61430,AT3G61890,AT4G04330,AT4G11890,AT4G23450,AT4G27410,AT4G34000,AT4G38410…	GO:0009414	48
response to cold	0.0023324298237875013	AT1G09350,AT1G20440,AT1G20450,AT1G20620,AT1G22770,AT1G29395,AT1G56600,AT1G61520,AT1G76180,AT1G79440,AT2G05070,AT2G17840,AT2G19450,AT2G21660,AT2G30250,AT2G33380,AT2G37770,AT2G42540,AT3G27690,AT3G47470,AT3G48360,AT3G50260,AT3G50970,AT3G54890,AT3G57260,AT4G02520,AT4G04330,AT4G11890,AT4G33980,AT4G38410,AT5G06760,AT5G15960,AT5G20230,AT5G20630,AT5G43170,AT5G52310,AT5G58770,AT5G66400	GO:0009409	38
response to red or far red light	0.00005203280409970151	AT1G09570,AT1G10370,AT1G22770,AT1G29910,AT1G29920,AT2G05070,AT2G21650,AT2G42540,AT2G42870,AT2G43010,AT2G46790,AT2G46970,AT3G08940,AT3G27690,AT3G54890,AT3G59060,AT4G14130,AT4G14690,AT4G16780,AT4G27310,AT4G32280,AT4G33980,AT4G34550,AT5G02810,AT5G15160,AT5G15840,AT5G15960,AT5G24470,AT5G39860,AT5G51810	GO:0009639	30
cellular response to hypoxia	0.020271047645198954	AT1G03610,AT1G10140,AT1G13300,AT1G15010,AT1G19530,AT1G21550,AT1G26380,AT1G26800,AT1G30720,AT1G33055,AT2G15890,AT2G26560,AT3G02040,AT3G06435,AT3G07350,AT3G10020,AT3G46080,AT4G20860,AT4G24230,AT4G27450,AT5G20230,AT5G20790,AT5G24530,AT5G47060,AT5G65207	GO:0071456	25
cellular response to decreased oxygen levels	0.023549706268118392	AT1G03610,AT1G10140,AT1G13300,AT1G15010,AT1G19530,AT1G21550,AT1G26380,AT1G26800,AT1G30720,AT1G33055,AT2G15890,AT2G26560,AT3G02040,AT3G06435,AT3G07350,AT3G10020,AT3G46080,AT4G20860,AT4G24230,AT4G27450,AT5G20230,AT5G20790,AT5G24530,AT5G47060,AT5G65207	GO:0036294	25
cellular response to oxygen levels	0.023549706268118392	AT1G03610,AT1G10140,AT1G13300,AT1G15010,AT1G19530,AT1G21550,AT1G26380,AT1G26800,AT1G30720,AT1G33055,AT2G15890,AT2G26560,AT3G02040,AT3G06435,AT3G07350,AT3G10020,AT3G46080,AT4G20860,AT4G24230,AT4G27450,AT5G20230,AT5G20790,AT5G24530,AT5G47060,AT5G65207	GO:0071453	25
circadian rhythm	0.00000676417420115805	AT1G18330,AT1G22770,AT2G17840,AT2G21660,AT2G42540,AT2G46790,AT3G07650,AT3G12320,AT3G19720,AT3G20810,AT3G26740,AT3G48360,AT4G09970,AT4G26700,AT4G33980,AT5G02810,AT5G06980,AT5G15840,AT5G24470,AT5G37260,AT5G52310,AT5G59570,AT5G60100,AT5G64170	GO:0007623	24
rhythmic process	0.00001775493863026514	AT1G18330,AT1G22770,AT2G17840,AT2G21660,AT2G42540,AT2G46790,AT3G07650,AT3G12320,AT3G19720,AT3G20810,AT3G26740,AT3G48360,AT4G09970,AT4G26700,AT4G33980,AT5G02810,AT5G06980,AT5G15840,AT5G24470,AT5G37260,AT5G52310,AT5G59570,AT5G60100,AT5G64170	GO:0048511	24
response to light intensity	0.00036039111650292997	AT1G01470,AT1G09570,AT1G21400,AT1G61520,AT2G05070,AT2G17840,AT2G42540,AT2G43010,AT3G03830,AT3G27690,AT3G47340,AT3G47470,AT3G47860,AT3G48390,AT3G54890,AT3G59060,AT4G14690,AT4G24230,AT4G33980,AT5G18170,AT5G20230,AT5G54270	GO:0009642	22
organic acid catabolic process	0.029866282211901327	AT1G03090,AT1G06570,AT1G08630,AT1G21400,AT1G64660,AT1G78440,AT1G79440,AT3G45300,AT3G47340,AT3G48990,AT3G51840,AT4G21200,AT4G33150,AT5G09300,AT5G24530,AT5G34780,AT5G48880,AT5G53970,AT5G54080	GO:0016054	19
carboxylic acid catabolic process	0.029866282211901327	AT1G03090,AT1G06570,AT1G08630,AT1G21400,AT1G64660,AT1G78440,AT1G79440,AT3G45300,AT3G47340,AT3G48990,AT3G51840,AT4G21200,AT4G33150,AT5G09300,AT5G24530,AT5G34780,AT5G48880,AT5G53970,AT5G54080	GO:0046395	19
response to far red light	0.00007463133951579441	AT1G09570,AT1G22770,AT1G29910,AT1G29920,AT2G05070,AT3G08940,AT3G27690,AT3G54890,AT4G14130,AT4G14690,AT4G16780,AT4G32280,AT5G15840,AT5G24470	GO:0010218	14
response to red light	0.022419903236496726	AT1G09570,AT1G29910,AT1G29920,AT2G05070,AT2G21650,AT2G43010,AT3G08940,AT3G27690,AT3G54890,AT4G14690,AT4G32280,AT4G33980,AT5G24470	GO:0010114	13
protein-chromophore linkage	0.0006421488439222779	AT1G09570,AT1G29910,AT1G29920,AT1G61520,AT2G02710,AT2G05070,AT2G34430,AT3G08940,AT3G27690,AT3G47470,AT3G54890,AT5G54270	GO:0018298	12
photosynthesis, light harvesting in photosystem I	0.00002225113362681293	AT1G29910,AT1G29920,AT1G61520,AT2G05070,AT2G34430,AT3G08940,AT3G27690,AT3G47470,AT3G54890,AT5G54270	GO:0009768	10
response to desiccation	0.000036865376481160585	AT1G01470,AT1G54100,AT1G76180,AT2G05070,AT2G33380,AT2G37180,AT2G39800,AT3G27690,AT4G39090,AT5G52310	GO:0009269	10
photosynthesis, light harvesting	0.029379348020537162	AT1G29910,AT1G29920,AT1G61520,AT2G05070,AT2G34430,AT3G08940,AT3G27690,AT3G47470,AT3G54890,AT5G54270	GO:0009765	10
response to low light intensity stimulus	0.030272446204949295	AT1G61520,AT2G05070,AT2G43010,AT3G27690,AT3G47470,AT3G54890,AT3G59060	GO:0009645	7

## Sheet: Molecular function
GO Term	p-value	Genes	GO Term	Matches
DNA-binding transcription factor activity	5.955161960186612e-9	AT1G03800,AT1G06160,AT1G13300,AT1G13600,AT1G18330,AT1G22070,AT1G22490,AT1G24260,AT1G26790,AT1G32510,AT1G49900,AT1G52890,AT1G53230,AT1G68550,AT1G69120,AT1G69180,AT1G69490,AT1G71030,AT1G74840,AT1G77200,AT2G03500,AT2G17770,AT2G19810,AT2G20880,AT2G21650,AT2G25900,AT2G30250,AT2G31730,AT2G34140,AT2G36080,AT2G36270,AT2G40200,AT2G43010,AT2G46680,AT2G46970,AT2G47190,AT3G02310,AT3G04070,AT3G07650,AT3G15500…	GO:0003700	104
transcription regulator activity	2.1010152416424144e-8	AT1G03800,AT1G06160,AT1G13300,AT1G13600,AT1G18330,AT1G22070,AT1G22490,AT1G24260,AT1G26790,AT1G32510,AT1G49900,AT1G52890,AT1G53230,AT1G68550,AT1G69120,AT1G69180,AT1G69490,AT1G71030,AT1G74840,AT1G77200,AT2G03500,AT2G17770,AT2G19810,AT2G20880,AT2G21650,AT2G25900,AT2G30250,AT2G31730,AT2G34140,AT2G36080,AT2G36270,AT2G40200,AT2G42870,AT2G43010,AT2G46680,AT2G46970,AT2G47190,AT3G02310,AT3G04070,AT3G07650…	GO:0140110	108
ion binding	0.018339981822906245	AT1G01190,AT1G02065,AT1G02620,AT1G03090,AT1G03850,AT1G04310,AT1G06570,AT1G06830,AT1G09080,AT1G09170,AT1G09350,AT1G09410,AT1G14120,AT1G14240,AT1G14250,AT1G14860,AT1G16150,AT1G17710,AT1G17960,AT1G18020,AT1G18200,AT1G20440,AT1G20450,AT1G20620,AT1G20650,AT1G21360,AT1G21400,AT1G21550,AT1G22500,AT1G25360,AT1G26380,AT1G26420,AT1G26790,AT1G26800,AT1G29910,AT1G29920,AT1G30720,AT1G30730,AT1G31690,AT1G31770…	GO:0043167	258
metal ion binding	0.0004122847099897292	AT1G01190,AT1G02065,AT1G03090,AT1G03850,AT1G04310,AT1G06570,AT1G06830,AT1G09350,AT1G09410,AT1G14120,AT1G14860,AT1G16150,AT1G17710,AT1G20440,AT1G20450,AT1G20620,AT1G21400,AT1G21550,AT1G22500,AT1G25360,AT1G26790,AT1G26800,AT1G29910,AT1G29920,AT1G31690,AT1G33720,AT1G37130,AT1G47400,AT1G49230,AT1G53580,AT1G56600,AT1G61520,AT1G61680,AT1G67980,AT1G68180,AT1G68930,AT1G69180,AT1G69830,AT1G76130,AT1G76180…	GO:0046872	166
cation binding	0.0005245163395058554	AT1G01190,AT1G02065,AT1G03090,AT1G03850,AT1G04310,AT1G06570,AT1G06830,AT1G09350,AT1G09410,AT1G14120,AT1G14860,AT1G16150,AT1G17710,AT1G20440,AT1G20450,AT1G20620,AT1G21400,AT1G21550,AT1G22500,AT1G25360,AT1G26790,AT1G26800,AT1G29910,AT1G29920,AT1G31690,AT1G33720,AT1G37130,AT1G47400,AT1G49230,AT1G53580,AT1G56600,AT1G61520,AT1G61680,AT1G67980,AT1G68180,AT1G68930,AT1G69180,AT1G69830,AT1G76130,AT1G76180…	GO:0043169	166
DNA binding	0.0015995658463662324	AT1G02065,AT1G03800,AT1G06160,AT1G13300,AT1G16640,AT1G18330,AT1G22070,AT1G22490,AT1G24260,AT1G26790,AT1G28260,AT1G32510,AT1G49475,AT1G52890,AT1G53230,AT1G68550,AT1G69120,AT1G69180,AT1G69490,AT1G71030,AT1G74840,AT1G77200,AT1G80420,AT2G03500,AT2G17770,AT2G18328,AT2G19810,AT2G20880,AT2G21650,AT2G21660,AT2G24700,AT2G25900,AT2G28560,AT2G28720,AT2G29680,AT2G30250,AT2G31730,AT2G34140,AT2G36080,AT2G36270…	GO:0003677	118
oxidoreductase activity	0.00014879965402268017	AT1G01190,AT1G01500,AT1G03850,AT1G06570,AT1G06830,AT1G14120,AT1G18020,AT1G19400,AT1G20620,AT1G21400,AT1G26380,AT1G26420,AT1G30720,AT1G30730,AT1G31690,AT1G33720,AT1G37130,AT1G52990,AT1G53580,AT1G54100,AT1G62180,AT1G65970,AT1G77760,AT1G78440,AT1G79440,AT2G23910,AT2G26710,AT2G29300,AT2G29340,AT2G33380,AT2G34500,AT2G37770,AT2G39800,AT2G41330,AT2G46750,AT3G01070,AT3G01440,AT3G03910,AT3G13730,AT3G20810…	GO:0016491	86
transporter activity	0.03141875949947154	AT1G08890,AT1G11260,AT1G11450,AT1G12480,AT1G15960,AT1G18320,AT1G20350,AT1G21360,AT1G21890,AT1G31770,AT1G50400,AT1G56080,AT1G66780,AT1G69480,AT1G77210,AT1G79520,AT2G02020,AT2G34360,AT2G37170,AT2G37180,AT2G39010,AT2G39510,AT2G41190,AT3G08040,AT3G09450,AT3G10110,AT3G10520,AT3G12750,AT3G14770,AT3G20460,AT3G27170,AT3G28345,AT3G51490,AT3G52310,AT3G53940,AT3G54510,AT3G54830,AT3G56200,AT3G61430,AT4G05110…	GO:0005215	60
transition metal ion binding	0.027427781714148336	AT1G01190,AT1G03090,AT1G09410,AT1G20440,AT1G20450,AT1G20620,AT1G25360,AT1G31690,AT1G33720,AT1G37130,AT1G47400,AT1G68180,AT1G68930,AT1G77760,AT1G79440,AT2G01520,AT2G01818,AT2G01890,AT2G22070,AT2G26710,AT2G27610,AT2G34500,AT2G36320,AT3G07650,AT3G13730,AT3G16870,AT3G26210,AT3G26220,AT3G26230,AT3G26280,AT3G26290,AT3G28740,AT3G42860,AT3G48280,AT3G48360,AT3G49170,AT3G50970,AT3G56090,AT3G60530,AT4G15396…	GO:0046914	58
transmembrane transporter activity	0.030593439587152726	AT1G08890,AT1G11260,AT1G11450,AT1G12480,AT1G15960,AT1G18320,AT1G20350,AT1G21890,AT1G31770,AT1G50400,AT1G56080,AT1G66780,AT1G69480,AT1G77210,AT1G79520,AT2G02020,AT2G34360,AT2G37170,AT2G37180,AT2G39010,AT2G39510,AT2G41190,AT3G08040,AT3G09450,AT3G10110,AT3G12750,AT3G14770,AT3G20460,AT3G27170,AT3G28345,AT3G51490,AT3G52310,AT3G53940,AT3G54510,AT3G54830,AT3G56200,AT3G61430,AT4G05110,AT4G05130,AT4G17340…	GO:0022857	58
cofactor binding	0.00705159062001749	AT1G01190,AT1G03850,AT1G06830,AT1G18020,AT1G20620,AT1G26380,AT1G26420,AT1G29910,AT1G29920,AT1G30720,AT1G30730,AT1G31690,AT1G33720,AT1G37130,AT1G61520,AT1G64660,AT1G77760,AT1G79440,AT2G02930,AT2G05070,AT2G16570,AT2G24850,AT2G26710,AT2G34430,AT2G34500,AT2G37770,AT2G38400,AT2G46750,AT3G08940,AT3G10520,AT3G13730,AT3G26210,AT3G26220,AT3G26230,AT3G26280,AT3G26290,AT3G27690,AT3G28740,AT3G45300,AT3G47470…	GO:0048037	56
regulatory region nucleic acid binding	0.013703870556065666	AT1G03800,AT1G22070,AT1G24260,AT1G69120,AT1G69490,AT1G71030,AT1G74840,AT2G20880,AT2G36080,AT2G36270,AT2G46680,AT2G47190,AT3G02310,AT3G04070,AT3G07650,AT3G16870,AT3G17600,AT3G49410,AT3G49930,AT3G50260,AT3G54340,AT3G56980,AT3G60530,AT3G61890,AT4G05100,AT4G14550,AT4G21440,AT4G23750,AT4G27410,AT4G28140,AT4G34000,AT4G34590,AT4G34610,AT4G36900,AT5G15800,AT5G20240,AT5G22290,AT5G25890,AT5G26630,AT5G39610…	GO:0001067	46
transcription regulatory region DNA binding	0.013703870556065666	AT1G03800,AT1G22070,AT1G24260,AT1G69120,AT1G69490,AT1G71030,AT1G74840,AT2G20880,AT2G36080,AT2G36270,AT2G46680,AT2G47190,AT3G02310,AT3G04070,AT3G07650,AT3G16870,AT3G17600,AT3G49410,AT3G49930,AT3G50260,AT3G54340,AT3G56980,AT3G60530,AT3G61890,AT4G05100,AT4G14550,AT4G21440,AT4G23750,AT4G27410,AT4G28140,AT4G34000,AT4G34590,AT4G34610,AT4G36900,AT5G15800,AT5G20240,AT5G22290,AT5G25890,AT5G26630,AT5G39610…	GO:0044212	46
protein dimerization activity	0.003522926017531416	AT1G09570,AT1G12780,AT1G13600,AT1G22490,AT1G24260,AT1G26540,AT1G26945,AT1G69120,AT1G77520,AT1G77530,AT2G28720,AT2G31730,AT2G38310,AT2G40200,AT2G40330,AT2G42870,AT2G43010,AT2G46970,AT3G02310,AT3G22100,AT3G29035,AT3G54340,AT3G56980,AT3G59060,AT4G01026,AT4G10960,AT4G16690,AT4G16780,AT4G26670,AT4G34590,AT5G15160,AT5G15800,AT5G20240,AT5G26630,AT5G39610,AT5G39860,AT5G41315,AT5G44780,AT5G49450	GO:0046983	38
tetrapyrrole binding	0.00015554171850956503	AT1G01190,AT1G20620,AT1G29910,AT1G29920,AT1G33720,AT1G37130,AT1G61520,AT1G77760,AT2G05070,AT2G26710,AT2G34430,AT2G34500,AT3G08940,AT3G10520,AT3G13730,AT3G26210,AT3G26220,AT3G26230,AT3G26280,AT3G26290,AT3G27690,AT3G28740,AT3G47470,AT3G48280,AT3G54890,AT4G15396,AT4G16270,AT4G20240,AT5G39580,AT5G44620,AT5G54270	GO:0046906	31
hydrolase activity, acting on glycosyl bonds	0.019521916522955388	AT1G12240,AT1G13635,AT1G56710,AT1G62660,AT1G65310,AT1G69830,AT1G76130,AT2G44480,AT3G03640,AT3G13750,AT3G15720,AT3G23730,AT3G44990,AT3G57260,AT4G14130,AT4G19820,AT4G24040,AT4G24260,AT4G30290,AT4G33440,AT4G35190,AT5G20710,AT5G49360,AT5G55700,AT5G56870,AT5G63800	GO:0016798	25
oxidoreductase activity, acting on paired donors, with incorporation or reduction of molecular oxygen	0.017033524571853316	AT1G01190,AT1G33720,AT1G78440,AT2G26710,AT2G34500,AT3G13730,AT3G20810,AT3G26210,AT3G26220,AT3G26230,AT3G26280,AT3G26290,AT3G28740,AT3G48280,AT4G15396,AT4G20240,AT4G21200,AT4G25420,AT4G37760,AT5G24155,AT5G24530,AT5G44620,AT5G51810	GO:0016705	23
hydrolase activity, hydrolyzing O-glycosyl compounds	0.021035779526688572	AT1G12240,AT1G56710,AT1G62660,AT1G65310,AT1G69830,AT1G76130,AT2G44480,AT3G03640,AT3G13750,AT3G15720,AT3G23730,AT3G44990,AT3G57260,AT4G14130,AT4G19820,AT4G24040,AT4G24260,AT4G30290,AT4G33440,AT5G20710,AT5G49360,AT5G55700,AT5G56870,AT5G63800	GO:0004553	23
transferase activity, transferring hexosyl groups	0.029757793140249254	AT1G08280,AT1G09350,AT1G11730,AT1G23870,AT1G24070,AT1G56600,AT1G60140,AT1G65310,AT1G70290,AT2G16890,AT2G18700,AT2G36970,AT2G43820,AT2G43840,AT3G23730,AT3G44990,AT3G46690,AT3G50740,AT4G02130,AT4G14130,AT4G27570,AT4G30290,AT4G34138,AT4G37690,AT5G05880,AT5G16190,AT5G28910	GO:0016758	23
molecular transducer activity	0.007328073612801858	AT1G04310,AT1G09570,AT1G20650,AT1G48210,AT1G65790,AT2G02710,AT2G23950,AT2G32800,AT2G38310,AT2G40330,AT2G40670,AT2G40710,AT2G46790,AT4G01026,AT4G10390,AT5G01550,AT5G02810,AT5G23170,AT5G24470,AT5G60100,AT5G65600	GO:0060089	21
heme binding	0.03924450627636924	AT1G01190,AT1G20620,AT1G33720,AT1G37130,AT1G77760,AT2G26710,AT2G34500,AT3G10520,AT3G13730,AT3G26210,AT3G26220,AT3G26230,AT3G26280,AT3G26290,AT3G28740,AT3G48280,AT4G15396,AT4G16270,AT4G20240,AT5G39580,AT5G44620	GO:0020037	21
monooxygenase activity	0.022573708965881848	AT1G01190,AT1G33720,AT2G26710,AT2G33380,AT2G34500,AT3G13730,AT3G26210,AT3G26220,AT3G26230,AT3G26280,AT3G26290,AT3G28740,AT3G48280,AT4G15396,AT4G20240,AT4G37760,AT5G24155,AT5G24530,AT5G44620	GO:0004497	19
signaling receptor activity	0.04645360192280258	AT1G04310,AT1G09570,AT1G20650,AT1G48210,AT1G65790,AT2G02710,AT2G23950,AT2G32800,AT2G38310,AT2G40330,AT2G40710,AT4G01026,AT4G10390,AT5G01550,AT5G23170,AT5G65600	GO:0038023	16
dioxygenase activity	0.0009371033958209198	AT1G06570,AT1G14120,AT1G53580,AT1G78440,AT3G20810,AT3G49620,AT3G55970,AT4G19170,AT4G21200,AT4G25420,AT5G24530,AT5G43440,AT5G43450,AT5G51810,AT5G54080	GO:0051213	15
carboxylic ester hydrolase activity	0.01520604088648577	AT1G02660,AT1G23200,AT1G53830,AT1G73480,AT2G23560,AT2G26560,AT2G39400,AT2G43050,AT2G45600,AT3G02410,AT4G16690,AT4G37150,AT5G04040,AT5G06570,AT5G58310	GO:0052689	15
oxidoreductase activity, acting on paired donors, with incorporation or reduction of molecular oxygen, NAD(P)H as one donor, and incorporation of one atom of oxygen	0.01702174066355973	AT1G33720,AT3G13730,AT3G26210,AT3G26220,AT3G26230,AT3G26280,AT3G26290,AT3G28740,AT3G48280,AT4G20240,AT4G37760,AT5G24155,AT5G24530,AT5G44620	GO:0016709	14
glucosyltransferase activity	0.022230102934825004	AT1G23870,AT1G24070,AT1G60140,AT1G65310,AT1G70290,AT2G18700,AT2G43820,AT2G43840,AT3G23730,AT3G44990,AT3G46690,AT3G50740,AT4G14130,AT4G30290,AT4G34138,AT5G05880,AT5G16190	GO:0046527	13
solute:proton symporter activity	0.0016782470709817163	AT1G08890,AT1G11260,AT1G77210,AT2G02020,AT3G20460,AT3G27170,AT3G51490,AT4G36670,AT5G26340,AT5G46050,AT5G62730	GO:0015295	11
solute:cation symporter activity	0.002793575796566125	AT1G08890,AT1G11260,AT1G77210,AT2G02020,AT3G20460,AT3G27170,AT3G51490,AT4G36670,AT5G26340,AT5G46050,AT5G62730	GO:0015294	11
flavin adenine dinucleotide binding	0.030214681708503992	AT1G26380,AT1G26420,AT1G30720,AT1G30730,AT1G37130,AT1G77760,AT2G46750,AT3G45300,AT3G51840,AT4G20860,AT4G37760	GO:0050660	11
symporter activity	0.03532323378883624	AT1G08890,AT1G11260,AT1G77210,AT2G02020,AT3G20460,AT3G27170,AT3G51490,AT4G36670,AT5G26340,AT5G46050,AT5G62730	GO:0015293	11
chlorophyll binding	4.182821212106979e-7	AT1G29910,AT1G29920,AT1G61520,AT2G05070,AT2G34430,AT3G08940,AT3G27690,AT3G47470,AT3G54890,AT5G54270	GO:0016168	10
carbohydrate transmembrane transporter activity	0.0032727169559014307	AT1G08890,AT1G11260,AT1G77210,AT3G14770,AT3G20460,AT3G51490,AT4G36670,AT5G23660,AT5G26340,AT5G50790	GO:0015144	10
oxidoreductase activity, acting on the aldehyde or oxo group of donors	0.00030234292944308585	AT1G14120,AT1G21400,AT1G54100,AT1G79440,AT2G39800,AT3G55610,AT4G33790,AT5G09300,AT5G20630,AT5G34780	GO:0016903	9
FAD binding	0.005432941711004731	AT1G26380,AT1G26420,AT1G30720,AT1G30730,AT1G37130,AT1G77760,AT2G46750,AT4G20860	GO:0071949	8
carbohydrate:proton symporter activity	0.0036855764303767875	AT1G08890,AT1G11260,AT1G77210,AT3G20460,AT3G51490,AT4G36670,AT5G26340	GO:0005351	7
carbohydrate:cation symporter activity	0.0036855764303767875	AT1G08890,AT1G11260,AT1G77210,AT3G20460,AT3G51490,AT4G36670,AT5G26340	GO:0005402	7
protein domain specific binding	0.035456834102154056	AT1G34760,AT1G61520,AT2G34430,AT3G47470,AT3G54890,AT4G02520,AT5G54270	GO:0019904	7
peptide transmembrane transporter activity	0.041611961529723754	AT1G18320,AT1G20350,AT1G50400,AT2G02020,AT3G10110,AT4G26670,AT5G46050,AT5G62730	GO:1904680	7
water transmembrane transporter activity	0.0017589652102141702	AT2G37170,AT2G37180,AT2G39010,AT3G61430,AT4G17340,AT5G47450	GO:0005372	6
water channel activity	0.0017589652102141702	AT2G37170,AT2G37180,AT2G39010,AT3G61430,AT4G17340,AT5G47450	GO:0015250	6
methyl indole-3-acetate esterase activity	0.0017589652102141702	AT2G23560,AT2G45600,AT4G16690,AT4G37150,AT5G06570,AT5G58310	GO:0080030	6
sugar transmembrane transporter activity	0.002035693373440465	AT1G11260,AT1G77210,AT3G14770,AT5G23660,AT5G26340,AT5G50790	GO:0051119	6
oxidoreductase activity, acting on the CH-NH2 group of donors	0.002686322466515948	AT1G31690,AT3G03910,AT5G07440,AT5G18170,AT5G43440,AT5G43450	GO:0016638	6
2-oxoglutarate-dependent dioxygenase activity	0.013443508794256194	AT1G78440,AT3G20810,AT4G21200,AT4G25420,AT5G24530,AT5G51810	GO:0016706	6
protein disulfide oxidoreductase activity	0.047283111686424684	AT1G03850,AT1G06830,AT1G52990,AT2G41330,AT4G33040,AT5G11930	GO:0015035	6
phosphorelay response regulator activity	0.00646452065990522	AT2G40670,AT2G46790,AT5G02810,AT5G24470,AT5G60100	GO:0000156	5
xyloglucan:xyloglucosyl transferase activity	0.00646452065990522	AT1G65310,AT3G23730,AT3G44990,AT4G14130,AT4G30290	GO:0016762	5
oxidoreductase activity, acting on the aldehyde or oxo group of donors, NAD or NADP as acceptor	0.016093110460092052	AT1G54100,AT1G79440,AT2G39800,AT3G55610,AT4G33790	GO:0016620	5
galactosyltransferase activity	0.02331472363893036	AT1G08280,AT1G09350,AT1G11730,AT1G56600,AT4G37690	GO:0008378	5
quercetin 7-O-glucosyltransferase activity	0.04636132044400903	AT2G43820,AT2G43840,AT3G46690,AT4G34138,AT5G05880	GO:0080044	5
nickel cation binding	0.0006863441608077791	AT1G20440,AT1G20450,AT3G50970,AT5G66400	GO:0016151	4
beta-galactosidase activity	0.00438619547089099	AT3G13750,AT5G20710,AT5G56870,AT5G63800	GO:0004565	4
methyl salicylate esterase activity	0.00438619547089099	AT2G23560,AT4G16690,AT4G37150,AT5G58310	GO:0080031	4
methyl jasmonate esterase activity	0.00438619547089099	AT2G23560,AT4G16690,AT4G37150,AT5G58310	GO:0080032	4
galactosidase activity	0.010412628713347917	AT3G13750,AT5G20710,AT5G56870,AT5G63800	GO:0015925	4
modified amino acid binding	0.013834033666575936	AT1G20450,AT1G76180,AT2G02930,AT4G02520	GO:0072341	4
oxidoreductase activity, acting on single donors with incorporation of molecular oxygen, incorporation of two atoms of oxygen	0.01789451632762255	AT1G06570,AT1G53580,AT4G19170,AT5G54080	GO:0016702	4
nucleoside transmembrane transporter activity	0.031025644552293653	AT3G51490,AT4G05110,AT4G05130,AT4G18195	GO:0005337	4
oxidoreductase activity, acting on single donors with incorporation of molecular oxygen	0.048605418826271056	AT1G06570,AT1G53580,AT4G19170,AT5G54080	GO:0016701	4
glutamate dehydrogenase [NAD(P)+] activity	0.00018786210121535802	AT3G03910,AT5G07440,AT5G18170	GO:0004353	3
alpha-ketoacid dehydrogenase activity	0.00045689001106421654	AT1G21400,AT5G09300,AT5G34780	GO:0003826	3
oxidoreductase activity, acting on the CH-NH2 group of donors, NAD or NADP as acceptor	0.00045689001106421654	AT3G03910,AT5G07440,AT5G18170	GO:0016639	3
oxidoreductase activity, acting on the aldehyde or oxo group of donors, disulfide as acceptor	0.010501518480755095	AT1G21400,AT5G09300,AT5G34780	GO:0016624	3
diacylglycerol O-acyltransferase activity	0.022412488138604567	AT2G19450,AT5G37300,AT5G53390	GO:0004144	3
acylglycerol lipase activity	0.02618211634774846	AT1G73480,AT2G26560,AT2G39400	GO:0047372	3
abscisic acid binding	0.030268851512159252	AT2G38310,AT2G40330,AT4G01026	GO:0010427	3
monosaccharide transmembrane transporter activity	0.03467040232005835	AT1G11260,AT1G77210,AT5G26340	GO:0015145	3
long-chain-alcohol O-fatty-acyltransferase activity	0.03938328736113941	AT5G37300,AT5G53390,AT5G55380	GO:0047196	3
protein phosphatase inhibitor activity	0.044402958527699675	AT2G38310,AT2G40330,AT4G01026	GO:0004864	3
isoprenoid binding	0.04972391580572743	AT2G38310,AT2G40330,AT4G01026	GO:0019840	3
phosphatidylserine binding	0.001327852072095611	AT1G20450,AT1G76180	GO:0001786	2
glutamate 5-kinase activity	0.001327852072095611	AT2G39800,AT3G55610	GO:0004349	2
glutamate-5-semialdehyde dehydrogenase activity	0.001327852072095611	AT2G39800,AT3G55610	GO:0004350	2
nitrate reductase (NADH) activity	0.001327852072095611	AT1G37130,AT1G77760	GO:0009703	2
xyloglucan-specific endo-beta-1,4-glucanase activity	0.001327852072095611	AT1G65310,AT3G44990,AT4G14130,AT4G30290	GO:0033946	2
nitrate reductase [NAD(P)H] activity	0.001327852072095611	AT1G37130,AT1G77760	GO:0050463	2
nitrate reductase (NADPH) activity	0.001327852072095611	AT1G37130,AT1G77760	GO:0050464	2
benzoic acid glucosyltransferase activity	0.001327852072095611	AT2G43820,AT2G43840	GO:0052641	2
acyl-CoA dehydrogenase activity	0.003886995861637159	AT3G45300,AT3G51840	GO:0003995	2
alpha-amylase activity	0.003886995861637159	AT1G69830,AT1G76130	GO:0004556	2
nitrate reductase activity	0.003886995861637159	AT1G37130,AT1G77760	GO:0008940	2
adenylyl-sulfate reductase activity	0.003886995861637159	AT1G62180,AT4G21990	GO:0009973	2
adenylyl-sulfate reductase (glutathione) activity	0.003886995861637159	AT1G62180,AT4G21990	GO:0033741	2
molybdopterin cofactor binding	0.003886995861637159	AT1G37130,AT1G77760	GO:0043546	2
oxidoreductase activity, acting on other nitrogenous compounds as donors, with NAD or NADP as acceptor	0.003886995861637159	AT1G37130,AT1G77760	GO:0046857	2
salicylic acid glucosyltransferase (glucoside-forming) activity	0.003886995861637159	AT2G43820,AT2G43840	GO:0052640	2
UDP-glucose:4-aminobenzoate acylglucosyltransferase activity	0.003886995861637159	AT2G43820,AT2G43840	GO:0080002	2
alpha-amylase activity (releasing maltohexaose)	0.003886995861637159	AT1G69830,AT1G76130	GO:0103025	2
3-methyl-2-oxobutanoate dehydrogenase (2-methylpropanoyl-transferring) activity	0.007586129622058956	AT1G21400,AT5G09300	GO:0003863	2
asparagine synthase (glutamine-hydrolyzing) activity	0.007586129622058956	AT3G47340,AT5G65010	GO:0004066	2
phosphotransferase activity, paired acceptors	0.007586129622058956	AT4G24450,AT5G26570	GO:0016781	2
beta-glucanase activity	0.007586129622058956	AT1G65310,AT3G44990,AT4G14130,AT4G30290	GO:0052736	2
L-tyrosine:2-oxoglutarate aminotransferase activity	0.012338956029388774	AT2G24850,AT5G53970	GO:0004838	2
phosphatidylcholine binding	0.012338956029388774	AT1G20450,AT1G76180	GO:0031210	2
gibberellin 20-oxidase activity	0.012338956029388774	AT4G25420,AT5G51810	GO:0045544	2
quaternary ammonium group binding	0.012338956029388774	AT1G20450,AT1G76180	GO:0050997	2
L-tyrosine aminotransferase activity	0.012338956029388774	AT2G24850,AT5G53970	GO:0070547	2
oxidoreductase activity, acting on other nitrogenous compounds as donors	0.018063939498442916	AT1G37130,AT1G77760	GO:0016661	2
ammonium ion binding	0.018063939498442916	AT1G20450,AT1G76180	GO:0070405	2
squalene monooxygenase activity	0.024684074501820228	AT4G37760,AT5G24155	GO:0004506	2
phosphoglycerate dehydrogenase activity	0.024684074501820228	AT1G01500,AT1G19400	GO:0004617	2
molybdenum ion binding	0.024684074501820228	AT1G37130,AT1G77760	GO:0030151	2
mitochondrion targeting sequence binding	0.024684074501820228	AT1G18320,AT3G10110	GO:0030943	2
gibberellin 2-beta-dioxygenase activity	0.024684074501820228	AT1G78440,AT4G21200	GO:0045543	2
dATP phosphohydrolase activity	0.024684074501820228	AT1G14240,AT1G14250	GO:0102485	2
dCTP phosphohydrolase activity	0.024684074501820228	AT1G14240,AT1G14250	GO:0102486	2
dUTP phosphohydrolase activity	0.024684074501820228	AT1G14240,AT1G14250	GO:0102487	2
dTTP phosphohydrolase activity	0.024684074501820228	AT1G14240,AT1G14250	GO:0102488	2
GTP phosphohydrolase activity	0.024684074501820228	AT1G14240,AT1G14250	GO:0102489	2
8-oxo-dGTP phosphohydrolase activity	0.024684074501820228	AT1G14240,AT1G14250	GO:0102490	2
dGTP phosphohydrolase activity	0.024684074501820228	AT1G14240,AT1G14250	GO:0102491	2
ferric-chelate reductase activity	0.032126664413815016	AT5G49730,AT5G50160	GO:0000293	2
oxidoreductase activity, oxidizing metal ions, NAD or NADP as acceptor	0.032126664413815016	AT5G49730,AT5G50160	GO:0016723	2
amino acid kinase activity	0.032126664413815016	AT2G39800,AT3G55610	GO:0019202	2
inositol 3-alpha-galactosyltransferase activity	0.032126664413815016	AT1G09350,AT1G56600	GO:0047216	2
amylase activity	0.04032311042151201	AT1G69830,AT1G76130,AT5G55700	GO:0016160	2
glucomannan 4-beta-mannosyltransferase activity	0.04032311042151201	AT1G24070,AT5G16190	GO:0047259	2
4-hydroxyphenylpyruvate dioxygenase activity	0.03646641542895146	AT1G06570	GO:0003868	1
glutamate dehydrogenase (NAD+) activity	0.03646641542895146	AT5G07440	GO:0004352	1
glycerol kinase activity	0.03646641542895146	AT1G80460	GO:0004370	1
homogentisate 1,2-dioxygenase activity	0.03646641542895146	AT5G54080	GO:0004411	1
alpha,alpha-trehalase activity	0.03646641542895146	AT4G24040	GO:0004555	1
phosphoadenylyl-sulfate reductase (thioredoxin) activity	0.03646641542895146	AT1G62180	GO:0004604	1
calcium-dependent protein serine/threonine phosphatase activity	0.03646641542895146	AT5G24270	GO:0004723	1
saccharopine dehydrogenase activity	0.03646641542895146	AT4G33150	GO:0004753	1
succinate-semialdehyde dehydrogenase (NAD+) activity	0.03646641542895146	AT1G79440	GO:0004777	1
high-affinity glucose:proton symporter activity	0.03646641542895146	AT5G26340	GO:0005358	1
isovaleryl-CoA dehydrogenase activity	0.03646641542895146	AT3G45300	GO:0008470	1
2-dehydropantoate 2-reductase activity	0.03646641542895146	AT5G34780	GO:0008677	1
succinate-semialdehyde dehydrogenase [NAD(P)+] activity	0.03646641542895146	AT1G79440	GO:0009013	1
xylose isomerase activity	0.03646641542895146	AT5G57655	GO:0009045	1
delta1-pyrroline-5-carboxylate synthetase activity	0.03646641542895146	AT2G39800	GO:0017084	1
methionine gamma-lyase activity	0.03646641542895146	AT1G64660	GO:0018826	1
farnesoic acid O-methyltransferase activity	0.03646641542895146	AT3G44860	GO:0019010	1
flavone synthase activity	0.03646641542895146	AT5G24530	GO:0033759	1
S-linalool synthase activity	0.03646641542895146	AT1G61680	GO:0034007	1
salicylate 5-hydroxylase activity	0.03646641542895146	AT5G24530	GO:0034785	1
pheophoridase activity	0.03646641542895146	AT4G16690	GO:0035560	1
mediator complex binding	0.03646641542895146	AT2G15890	GO:0036033	1
L-cystine L-cysteine-lyase (deaminating)	0.03646641542895146	AT5G28030	GO:0044540	1
saccharopine dehydrogenase (NADP+, L-lysine-forming) activity	0.03646641542895146	AT4G33150	GO:0047130	1
saccharopine dehydrogenase (NAD+, L-glutamate-forming) activity	0.03646641542895146	AT4G33150	GO:0047131	1
oxalate-CoA ligase activity	0.03646641542895146	AT3G48990	GO:0050203	1
sulfur dioxygenase activity	0.03646641542895146	AT1G53580	GO:0050313	1
phosphoglucan, water dikinase activity	0.03646641542895146	AT5G26570	GO:0051752	1
salicylic acid glucosyltransferase (ester-forming) activity	0.03646641542895146	AT2G43820	GO:0052639	1
phosphocholine phosphatase activity	0.03646641542895146	AT1G17710	GO:0052731	1
phosphoethanolamine phosphatase activity	0.03646641542895146	AT1G17710	GO:0052732	1
hydroxyjasmonate sulfotransferase activity	0.03646641542895146	AT5G07000,AT5G07010	GO:0080131	1
nicotinate-O-glucosyltransferase activity	0.03646641542895146	AT2G43820	GO:0090704	1
6-phosphoglucan, water dikinase activity	0.03646641542895146	AT5G26570	GO:0102217	1
phosphogluco-amylopectin water dikinase activity	0.03646641542895146	AT5G26570	GO:0102219	1
(+)-alpha-barbatene synthase activity	0.03646641542895146	AT5G44630	GO:0102878	1
(+)-thujopsene synthase activity	0.03646641542895146	AT5G44630	GO:0102879	1
(+)-beta-chamigrene synthase activity	0.03646641542895146	AT5G44630	GO:0102883	1

## Sheet: MapMan output
Process	AGI	Gene description	log2FC
Photosynthesis
PS.lightreaction.photosystem II.LHC-II	AT1G29910	CAB3, AB180, LHCB1.2 | CAB3 (CHLOROPHYLL A/B BINDING PROTEIN 3); chlorophyll binding | chr1:10472280-10473299 REVERSE	1.225
PS.lightreaction.photosystem II.LHC-II	AT1G29920	CAB2, AB165, LHCB1.1 | CAB2 (CHLOROPHYLL A/B-BINDING PROTEIN 2); chlorophyll binding | chr1:10474784-10475959 REVERSE	1.159
PS.lightreaction.photosystem II.LHC-II	AT2G05070	LHCB2.2, LHCB2 | LHCB2.2; chlorophyll binding | chr2:1799234-1800392 REVERSE	1.082
PS.lightreaction.photosystem II.LHC-II	AT2G34430	LHB1B1, LHCB1.4 | LHB1B1; chlorophyll binding | chr2:14524756-14525763 FORWARD	1.150
PS.lightreaction.photosystem II.LHC-II	AT3G08940	LHCB4.2 | LHCB4.2 (light harvesting complex PSII); chlorophyll binding | chr3:2717675-2718883 FORWARD	1.016
PS.lightreaction.photosystem II.LHC-II	AT3G27690	LHCB2.4, LHCB2.3, LHCB2 | LHCB2.3; chlorophyll binding | chr3:10255947-10257011 FORWARD	1.289
PS.lightreaction.photosystem II.LHC-II	AT5G54270	LHCB3, LHCB3*1 | LHCB3 (LIGHT-HARVESTING CHLOROPHYLL B-BINDING PROTEIN 3); structural molecule | chr5:22038273-22039568 FORWARD	1.317
PS.lightreaction.photosystem II.PSII polypeptide subunits	AT3G01440	oxygen evolving enhancer 3 (PsbQ) family protein | chr3:168435-169618 FORWARD	-1.446
PS.lightreaction.photosystem I.LHC-I	AT1G61520	LHCA3 | LHCA3; chlorophyll binding | chr1:22700010-22701383 FORWARD	1.011
PS.lightreaction.photosystem I.LHC-I	AT3G47470	LHCA4, CAB4 | LHCA4 (LIGHT-HARVESTING CHLOROPHYLL-PROTEIN COMPLEX I SUBUNIT A4); chlorophyll binding | chr3:17493372-17495033 REVERSE	1.186
PS.lightreaction.photosystem I.LHC-I	AT3G54890	LHCA1 | LHCA1; chlorophyll binding | chr3:20339504-20341103 REVERSE	1.343
Major CHO metabolism
major CHO metabolism.degradation.sucrose.invertases.vacuolar	AT1G12240	ATBETAFRUCT4, VAC-INV | ATBETAFRUCT4; beta-fructofuranosidase/ hydrolase, hydrolyzing O-glycosyl compounds | chr1:4153652-4157644 FORWARD	1.134
major CHO metabolism.degradation.sucrose.invertases.vacuolar	AT1G62660	beta-fructosidase (BFRUCT3) / beta-fructofuranosidase / invertase, vacuolar | chr1:23199718-23203765 FORWARD	1.075
major CHO metabolism.degradation.starch.starch cleavage.alpha amylase	AT1G69830	ATAMY3, AMY3 | AMY3 (ALPHA-AMYLASE-LIKE 3); alpha-amylase | chr1:26288278-26293053 REVERSE	1.073
major CHO metabolism.degradation.starch.starch cleavage.alpha amylase	AT1G76130	ATAMY2, AMY2 | AMY2 (ALPHA-AMYLASE-LIKE 2); alpha-amylase/ calcium ion binding / catalytic/ cation binding | chr1:28561281-28564076 FORWARD	-1.012
major CHO metabolism.degradation.starch.starch cleavage.beta amylase	AT5G55700	BMY6, BAM4 | BAM4 (BETA-AMYLASE 4); beta-amylase/ catalytic/ cation binding | chr5:22551749-22554964 FORWARD	1.062
major CHO metabolism.degradation.starch.glucan water dikinase	AT4G24450	GWD3, PWD, ATGWD2 | PWD (PHOSPHOGLUCAN, WATER DIKINASE); ATP binding / kinase | chr4:12635426-12642797 FORWARD	-1.033
major CHO metabolism.degradation.starch.glucan water dikinase	AT5G26570	PWD, OK1, ATGWD3 | ATGWD3; carbohydrate kinase/ catalytic/ phosphoglucan, water dikinase | chr5:9261580-9267729 FORWARD	-1.088
Minor CHO metabolism
minor CHO metabolism.raffinose family.galactinol synthases.known	AT1G09350	AtGolS3 | AtGolS3 (Arabidopsis thaliana galactinol synthase 3); transferase, transferring glycosyl groups / transferase, transferring hexosyl groups | chr1:3019819-3021441 FORWARD	1.336
minor CHO metabolism.raffinose family.galactinol synthases.known	AT1G56600	AtGolS2 | AtGolS2 (Arabidopsis thaliana galactinol synthase 2); transferase, transferring glycosyl groups / transferase, transferring hexosyl groups | chr1:21207537-21209596 FORWARD	1.529
minor CHO metabolism.trehalose.potential TPS/TPP	AT1G23870	ATTPS9, TPS9 | ATTPS9; transferase, transferring glycosyl groups / trehalose-phosphatase | chr1:8432179-8435656 FORWARD	1.380
minor CHO metabolism.trehalose.potential TPS/TPP	AT1G60140	ATTPS10, TPS10 | ATTPS10 (trehalose phosphate synthase); transferase, transferring glycosyl groups / trehalose-phosphatase | chr1:22176934-22180875 REVERSE	1.457
minor CHO metabolism.trehalose.potential TPS/TPP	AT1G70290	ATTPS8, TPS8, ATTPSC | ATTPS8; alpha,alpha-trehalose-phosphate synthase (UDP-forming)/ transferase, transferring glycosyl groups / trehalose-phosphatase | chr1:26471078-26474786 REVERSE	1.350
minor CHO metabolism.trehalose.potential TPS/TPP	AT2G18700	ATTPS11, TPS11, ATTPSB | ATTPS11; transferase, transferring glycosyl groups | chr2:8109043-8112010 FORWARD	1.913
minor CHO metabolism.trehalose.trehalase	AT4G24040	ATTRE1, TRE1 | TRE1 (TREHALASE 1); alpha,alpha-trehalase/ trehalase | chr4:12488183-12491235 FORWARD	2.490
minor CHO metabolism.myo-inositol.InsP Synthases	AT5G10170	ATMIPS3, MIPS3 | MIPS3 (MYO-INOSITOL-1-PHOSTPATE SYNTHASE 3); binding / catalytic/ inositol-3-phosphate synthase | chr5:3187277-3190251 REVERSE	-1.009
minor CHO metabolism.others	AT2G37770	aldo/keto reductase family protein | chr2:15834867-15836881 FORWARD	1.321
minor CHO metabolism.others.Xylose isomerase	AT5G57655	xylose isomerase family protein | chr5:23346760-23350039 FORWARD	1.602
Glycolisis
glycolysis.cytosolic branch.phosphoglycerate mutase	AT2G17280	phosphoglycerate/bisphosphoglycerate mutase family protein | chr2:7513211-7515048 FORWARD	-1.291
Fermentation
fermentation.aldehyde dehydrogenase	AT1G54100	ALDH7B4 | ALDH7B4 (Aldehyde Dehydrogenase 7B4); 3-chloroallyl aldehyde dehydrogenase/ oxidoreductase | chr1:20195264-20199130 REVERSE	1.743
Tricarboxylic acid cycle
TCA / org transformation.other organic acid transformatons.misc	AT1G79440	ALDH5F1, SSADH1, SSADH | ALDH5F1; 3-chloroallyl aldehyde dehydrogenase/ NAD or NADH binding / succinate-semialdehyde dehydrogenase | chr1:29882210-29887412 REVERSE	-1.058
Cell wall synthesis/degradation/modification
cell wall.precursor synthesis.UGE	AT1G12780	UGE1 | UGE1 (UDP-D-glucose/UDP-D-galactose 4-epimerase 1); UDP-glucose 4-epimerase/ protein dimerization | chr1:4355926-4358328 REVERSE	1.520
cell wall.precursor synthesis.UGE	AT4G10960	UGE5 | UGE5 (UDP-D-glucose/UDP-D-galactose 4-epimerase 5); UDP-glucose 4-epimerase/ protein dimerization | chr4:6713557-6718550 REVERSE	1.185
cell wall.precursor synthesis.sugar kinases.glucuronic acid kinase	AT5G14470	GHMP kinase-related | chr5:4662803-4664647 REVERSE	2.111
cell wall.cellulose synthesis	AT1G24070	ATCSLA10, CSLA10 | ATCSLA10; cellulose synthase/ transferase, transferring glycosyl groups | chr1:8516238-8519734 REVERSE	-1.008
cell wall.cellulose synthesis	AT5G16190	ATCSLA11, CSLA11 | ATCSLA11; cellulose synthase/ transferase, transferring glycosyl groups | chr5:5283550-5286293 REVERSE	-1.443
cell wall.cellulose synthesis.COBRA	AT5G60950	COBL5 | COBL5 (COBRA-LIKE PROTEIN 5 PRECURSOR) | chr5:24526847-24528084 REVERSE	1.299
cell wall.cell wall proteins	AT2G20870	cell wall protein precursor, putative | chr2:8981988-8982712 REVERSE	-3.876
cell wall.cell wall proteins	AT3G48530	KING1 | KING1 (SNF1-RELATED PROTEIN KINASE REGULATORY SUBUNIT GAMMA 1) | chr3:17987378-17989763 FORWARD	1.076
cell wall.cell wall proteins.AGPs.AGP	AT2G23130	AGP17, ATAGP17 | AGP17 (ARABINOGALACTAN PROTEIN 17) | chr2:9844350-9845385 FORWARD	-1.367
cell wall.cell wall proteins.AGPs.AGP	AT3G06360	AGP27, ATAGP27 | AGP27 | chr3:1928902-1929446 FORWARD	-1.616
cell wall.cell wall proteins.AGPs.AGP	AT4G09030	AGP10, ATAGP10 | AGP10 (ARABINOGALACTAN PROTEIN 10) | chr4:5792207-5792790 FORWARD	-1.423
cell wall.cell wall proteins.AGPs.AGP	AT5G18690	AGP25, ATAGP25 | AGP25 (ARABINOGALACTAN PROTEINS 25) | chr5:6233519-6234206 REVERSE	-1.059
cell wall.cell wall proteins.AGPs.AGP	AT5G44130	FLA13 | FLA13 (FASCICLIN-LIKE ARABINOGALACTAN PROTEIN 13 PRECURSOR) | chr5:17761090-17762003 FORWARD	-1.582
cell wall.cell wall proteins.LRR	AT1G62440	LRX2 | LRX2 (LEUCINE-RICH REPEAT/EXTENSIN 2); protein binding / structural constituent of cell wall | chr1:23111818-23115293 FORWARD	1.058
cell wall.cell wall proteins.LRR	AT2G15880	leucine-rich repeat family protein / extensin family protein | chr2:6918039-6920319 REVERSE	1.283
cell wall.cell wall proteins.LRR	AT2G46630	unknown protein | chr2:19145529-19146713 FORWARD	-1.031
cell wall.cell wall proteins.HRGP	AT4G28300	hydroxyproline-rich glycoprotein family protein | chr4:14014653-14017068 FORWARD	1.052
cell wall.degradation.mannan-xylose-arabinose-fucose	AT5G49360	BXL1, ATBXL1 | BXL1 (BETA-XYLOSIDASE 1); hydrolase, hydrolyzing O-glycosyl compounds | chr5:20011879-20016742 REVERSE	1.745
cell wall.degradation.pectate lyases and polygalacturonases	AT1G56710	glycoside hydrolase family 28 protein / polygalacturonase (pectinase) family protein | chr1:21258008-21259933 REVERSE	-2.023
cell wall.degradation.pectate lyases and polygalacturonases	AT3G15720	glycoside hydrolase family 28 protein / polygalacturonase (pectinase) family protein | chr3:5325290-5327537 REVERSE	-1.035
cell wall.degradation.pectate lyases and polygalacturonases	AT4G33440	glycoside hydrolase family 28 protein / polygalacturonase (pectinase) family protein | chr4:16091940-16094958 FORWARD	-1.078
cell wall.degradation.pectate lyases and polygalacturonases	AT5G48900	pectate lyase family protein | chr5:19825137-19829092 FORWARD	1.360
cell wall.modification	AT1G65310	ATXTH17, XTH17 | XTH17 (XYLOGLUCAN ENDOTRANSGLUCOSYLASE/HYDROLASE 17); hydrolase, acting on glycosyl bonds / hydrolase, hydrolyzing O-glycosyl compounds / xyloglucan:xyloglucosyl transferase | chr1:24257216-24258473 FORWARD	1.367
cell wall.modification	AT2G03090	ATEXPA15, EXP15, ATEXP15, ATHEXP ALPHA 1.3 | ATEXPA15 (ARABIDOPSIS THALIANA EXPANSIN A15) | chr2:916854-918643 REVERSE	-1.067
cell wall.modification	AT3G23730	xyloglucan:xyloglucosyl transferase, putative / xyloglucan endotransglycosylase, putative / endo-xyloglucan transferase, putative | chr3:8550110-8551335 FORWARD	-1.136
cell wall.modification	AT3G44990	XTR8, ATXTR8 | XTR8 (XYLOGLUCAN ENDO-TRANSGLYCOSYLASE-RELATED 8); hydrolase, acting on glycosyl bonds / xyloglucan:xyloglucosyl transferase | chr3:16446975-16448764 REVERSE	1.390
cell wall.modification	AT3G55500	ATEXPA16, EXP16, ATEXP16, ATHEXP ALPHA 1.7 | ATEXPA16 (ARABIDOPSIS THALIANA EXPANSIN A16) | chr3:20574831-20576182 REVERSE	3.106
cell wall.modification	AT4G14130	XTR7 | XTR7 (XYLOGLUCAN ENDOTRANSGLYCOSYLASE 7); hydrolase, acting on glycosyl bonds / hydrolase, hydrolyzing O-glycosyl compounds / xyloglucan:xyloglucosyl transferase | chr4:8137051-8138281 REVERSE	-1.565
cell wall.modification	AT4G17030	ATEXLB1, EXPR, AT-EXPR, ATEXPR1, ATHEXP BETA 3.1 | ATEXLB1 (ARABIDOPSIS THALIANA EXPANSIN-LIKE B1) | chr4:9581586-9583290 REVERSE	-1.562
cell wall.modification	AT4G30290	ATXTH19, XTH19 | XTH19 (XYLOGLUCAN ENDOTRANSGLUCOSYLASE/HYDROLASE 19); hydrolase, acting on glycosyl bonds / hydrolase, hydrolyzing O-glycosyl compounds / xyloglucan:xyloglucosyl transferase | chr4:14828712-14830016 REVERSE	1.177
cell wall.pectin*esterases.PME	AT1G53830	ATPME2 | ATPME2; pectinesterase | chr1:20098522-20100889 FORWARD	1.658
cell wall.pectin*esterases.PME	AT2G43050	ATPMEPCRD | ATPMEPCRD; enzyme inhibitor/ pectinesterase | chr2:17902484-17904443 FORWARD	1.344
cell wall.pectin*esterases.misc	AT1G23200	pectinesterase family protein | chr1:8227178-8229582 FORWARD	1.498
Lipid metabolism
lipid metabolism.FA synthesis and FA elongation.acyl coa ligase	AT3G48990	AMP-dependent synthetase and ligase family protein | chr3:18158747-18161379 REVERSE	1.732
lipid metabolism.FA synthesis and FA elongation.acyl coa ligase	AT5G16370	AAE5 | AAE5 (ACYL ACTIVATING ENZYME 5); catalytic | chr5:5356605-5358511 REVERSE	1.612
lipid metabolism.FA synthesis and FA elongation.acyl coa ligase	AT5G23050	AAE17 | AAE17 (ACYL-ACTIVATING ENZYME 17); catalytic/ ligase | chr5:7731269-7735439 REVERSE	-1.044
lipid metabolism.FA synthesis and FA elongation.fatty acid elongase	AT4G34250	KCS16 | KCS16 (3-KETOACYL-COA SYNTHASE 16); acyltransferase/ catalytic/ transferase, transferring acyl groups other than amino-acyl groups | chr4:16394708-16396495 FORWARD	1.310
lipid metabolism.FA synthesis and FA elongation.acyl-CoA binding protein	AT4G24230	ACBP3 | ACBP3 (ACYL-COA-BINDING DOMAIN 3); acyl-CoA binding | chr4:12566935-12568754 REVERSE	1.745
lipid metabolism.Phospholipid synthesis.choline kinase	AT4G09760	choline kinase, putative | chr4:6148758-6151245 REVERSE	1.131
lipid metabolism.Phospholipid synthesis.cyclopropane-fatty-acyl-phospholipid synthase	AT3G23510	cyclopropane fatty acid synthase, putative / CPA-FA synthase, putative | chr3:8427660-8433314 FORWARD	1.023
lipid metabolism.TAG synthesis	AT2G19450	TAG1, AS11, ABX45, DGAT1, RDS1, ATDGAT | TAG1 (TRIACYLGLYCEROL BIOSYNTHESIS DEFECT 1); diacylglycerol O-acyltransferase | chr2:8426206-8429736 FORWARD	-1.976
lipid metabolism.TAG synthesis	AT5G56100	glycine-rich protein / oleosin | chr5:22717115-22717751 FORWARD	1.528
lipid metabolism.glyceral metabolism.glycerol kinase	AT1G80460	NHO1, GLI1 | NHO1 (nonhost resistance to P. s. phaseolicola 1); carbohydrate kinase/ glycerol kinase | chr1:30246768-30249253 REVERSE	1.036
lipid metabolism.lipid transfer proteins etc	AT2G44300	lipid transfer protein-related | chr2:18307309-18308349 REVERSE	-1.248
lipid metabolism.'exotics'(steroids, squalene etc)	AT5G07000	ATST2B, ST2B | ST2B (SULFOTRANSFERASE 2B); hydroxyjasmonate sulfotransferase/ sulfotransferase | chr5:2171403-2172939 REVERSE	1.053
lipid metabolism.'exotics'(steroids, squalene etc)	AT5G07010	ATST2A, ST2A | ST2A (SULFOTRANSFERASE 2A); hydroxyjasmonate sulfotransferase/ sulfotransferase | chr5:2174678-2176106 REVERSE	3.914
lipid metabolism.lipid degradation.palmitoyl[protein] hydrolase	AT5G47330	palmitoyl protein thioesterase family protein | chr5:19207099-19208822 FORWARD	2.368
lipid metabolism.lipid degradation.lipases	AT1G28660	lipase, putative | chr1:10071712-10073411 REVERSE	-1.344
lipid metabolism.lipid degradation.lipases	AT1G28670	ARAB-1 | ARAB-1; carboxylesterase/ hydrolase, acting on ester bonds | chr1:10074507-10076344 REVERSE	-1.198
lipid metabolism.lipid degradation.lipases	AT1G73920	lipase family protein | chr1:27790875-27794914 FORWARD	1.017
lipid metabolism.lipid degradation.lipases	AT5G18630	lipase class 3 family protein | chr5:6202633-6205737 FORWARD	1.034
lipid metabolism.lipid degradation.lipases.triacylglycerol lipase	AT1G02660	lipase class 3 family protein | chr1:571955-574981 REVERSE	1.544
lipid metabolism.lipid degradation.lipases.acylglycerol lipase	AT2G39400	hydrolase, alpha/beta fold family protein | chr2:16452612-16454801 FORWARD	1.744
lipid metabolism.lipid degradation.lysophospholipases.glycerophosphodiester phosphodiesterase	AT3G02040	SRG3 | SRG3 (senescence-related gene 3); glycerophosphodiester phosphodiesterase/ phosphoric diester hydrolase | chr3:348167-350010 REVERSE	1.212
lipid metabolism.lipid degradation.lysophospholipases.glycerophosphodiester phosphodiesterase	AT5G08030	glycerophosphoryl diester phosphodiesterase family protein | chr5:2575033-2576783 REVERSE	1.006
lipid metabolism.lipid degradation.beta-oxidation.acyl CoA DH	AT3G51840	ACX4, ATSCX, ATG6 | ACX4 (ACYL-COA OXIDASE 4); acyl-CoA oxidase/ oxidoreductase | chr3:19225360-19229163 REVERSE	1.071
lipid metabolism.lipid degradation.beta-oxidation.enoyl CoA hydratase	AT3G24360	enoyl-CoA hydratase/isomerase family protein | chr3:8839728-8842831 REVERSE	-1.147
lipid metabolism.lipid degradation.beta-oxidation.acyl CoA reductase	AT4G33790	CER4, G7, FAR3 | CER4 (ECERIFERUM 4); fatty acyl-CoA reductase (alcohol-forming)/ oxidoreductase, acting on the CH-CH group of donors | chr4:16204157-16207947 REVERSE	-2.627
N-metabolism
N-metabolism.nitrate metabolism.NR	AT1G37130	NIA2, B29, NIA2-1, CHL3, NR, NR2, ATNR2 | NIA2 (NITRATE REDUCTASE 2); nitrate reductase (NADH)/ nitrate reductase | chr1:14158527-14161938 FORWARD	1.762
N-metabolism.nitrate metabolism.NR	AT1G77760	NIA1, GNR1, NR1 | NIA1 (NITRATE REDUCTASE 1); nitrate reductase | chr1:29235803-29239445 REVERSE	3.538
N-metabolism.N-degradation.glutamate dehydrogenase	AT3G03910	GDH3 | GDH3 (GLUTAMATE DEHYDROGENASE 3); binding / catalytic/ oxidoreductase/ oxidoreductase, acting on the CH-NH2 group of donors, NAD or NADP as acceptor | chr3:1006842-1009018 FORWARD	-1.568
N-metabolism.N-degradation.glutamate dehydrogenase	AT5G07440	GDH2 | GDH2 (GLUTAMATE DEHYDROGENASE 2); ATP binding / glutamate dehydrogenase [NAD(P)+]/ glutamate dehydrogenase/ oxidoreductase | chr5:2355937-2358194 FORWARD	1.096
N-metabolism.N-degradation.glutamate dehydrogenase	AT5G18170	GDH1 | GDH1 (GLUTAMATE DEHYDROGENASE 1); ATP binding / glutamate dehydrogenase [NAD(P)+]/ oxidoreductase | chr5:6006039-6008472 FORWARD	1.113
Amino acid metabolism
amino acid metabolism.synthesis.central amino acid metabolism.alanine.alanine-glyoxylate aminotransferase	AT2G38400	AGT3 | AGT3 (ALANINE:GLYOXYLATE AMINOTRANSFERASE 3); alanine-glyoxylate transaminase/ catalytic/ pyridoxal phosphate binding / transaminase | chr2:16083689-16086349 FORWARD	1.277
amino acid metabolism.synthesis.glutamate family.proline.delta 1-pyrroline-5-carboxylate synthetase	AT2G39800	P5CS1, ATP5CS | P5CS1 (DELTA1-PYRROLINE-5-CARBOXYLATE SYNTHASE 1); delta1-pyrroline-5-carboxylate synthetase | chr2:16598164-16603319 REVERSE	2.393
amino acid metabolism.synthesis.glutamate family.proline.delta 1-pyrroline-5-carboxylate synthetase	AT3G55610	P5CS2 | P5CS2 (DELTA 1-PYRROLINE-5-CARBOXYLATE SYNTHASE 2); catalytic/ glutamate 5-kinase/ glutamate-5-semialdehyde dehydrogenase/ oxidoreductase | chr3:20624020-20629093 REVERSE	1.145
amino acid metabolism.synthesis.aspartate family.asparagine.asparagine synthetase	AT3G47340	ASN1, DIN6, AT-ASN1 | ASN1 (GLUTAMINE-DEPENDENT ASPARAGINE SYNTHASE 1); asparagine synthase (glutamine-hydrolyzing) | chr3:17437884-17441243 REVERSE	2.158
amino acid metabolism.synthesis.aspartate family.asparagine.asparagine synthetase	AT5G65010	ASN2 | ASN2 (ASPARAGINE SYNTHETASE 2); asparagine synthase (glutamine-hydrolyzing) | chr5:25969190-25972575 FORWARD	1.608
amino acid metabolism.synthesis.branched chain group.common.branched-chain amino acid aminotransferase	AT1G10070	ATBCAT-2 | ATBCAT-2 (ARABIDOPSIS THALIANA BRANCHED-CHAIN AMINO ACID TRANSAMINASE 2); branched-chain-amino-acid transaminase/ catalytic | chr1:3288087-3290471 FORWARD	2.267
amino acid metabolism.synthesis.serine-glycine-cysteine group.cysteine.OASTL	AT5G28030	cysteine synthase, putative / O-acetylserine (thiol)-lyase, putative / O-acetylserine sulfhydrylase, putative | chr5:10030406-10032451 REVERSE	1.535
amino acid metabolism.synthesis.serine-glycine-cysteine group.cysteine.SAT	AT4G35640	ATSERAT3;2 | ATSERAT3;2 (Serine acetyltransferase 3;2); acetyltransferase/ serine O-acetyltransferase | chr4:16905579-16908357 REVERSE	-1.402
amino acid metabolism.synthesis.aromatic aa.tyrosine.tyrosine transaminase	AT2G24850	TAT3, TAT | TAT3 (TYROSINE AMINOTRANSFERASE 3); L-tyrosine:2-oxoglutarate aminotransferase/ transaminase | chr2:10582830-10585216 REVERSE	2.628
amino acid metabolism.degradation.aspartate family.methionine.methionine gamma-lyase	AT1G64660	ATMGL | ATMGL (ARABIDOPSIS THALIANA METHIONINE GAMMA-LYASE); catalytic/ methionine gamma-lyase | chr1:24028918-24030780 FORWARD	1.978
amino acid metabolism.degradation.aspartate family.lysine	AT4G33150	lysine-ketoglutarate reductase/saccharopine dehydrogenase bifunctional enzyme | chr4:15985189-15991536 REVERSE	1.064
amino acid metabolism.degradation.branched chain group.shared	AT1G21400	2-oxoisovalerate dehydrogenase, putative / 3-methyl-2-oxobutanoate dehydrogenase, putative / branched-chain alpha-keto acid dehydrogenase E1 alpha subunit, putative | chr1:7493426-7496710 FORWARD	1.688
amino acid metabolism.degradation.branched chain group.shared	AT5G09300	2-oxoisovalerate dehydrogenase, putative / 3-methyl-2-oxobutanoate dehydrogenase, putative / branched-chain alpha-keto acid dehydrogenase E1 alpha subunit, putative | chr5:2884179-2886863 REVERSE	-1.31
amino acid metabolism.degradation.branched chain group.leucine	AT1G03090	MCCA | MCCA; methylcrotonoyl-CoA carboxylase | chr1:739679-744184 FORWARD	1.731
amino acid metabolism.degradation.branched chain group.leucine	AT3G45300	IVD, ATIVD | IVD (ISOVALERYL-COA-DEHYDROGENASE); ATP binding / isovaleryl-CoA dehydrogenase | chr3:16620203-16625048 REVERSE	1.591
amino acid metabolism.degradation.branched chain group.isoleucine	AT5G48880	PKT2, KAT5 | PKT2 (PEROXISOMAL 3-KETO-ACYL-COA THIOLASE 2); acetyl-CoA C-acyltransferase/ catalytic | chr5:19814395-19817204 REVERSE	1.087
amino acid metabolism.degradation.serine-glycine-cysteine group.glycine	AT1G08630	THA1 | THA1 (Threonine Aldolase 1); aldehyde-lyase/ threonine aldolase | chr1:2743761-2746939 REVERSE	1.351
amino acid metabolism.degradation.aromatic aa.tyrosine	AT5G53970	aminotransferase, putative | chr5:21910533-21912777 FORWARD	1.086
amino acid metabolism.degradation.aromatic aa.tyrosine	AT5G54080	HGO | HGO (HOMOGENTISATE 1,2-DIOXYGENASE); homogentisate 1,2-dioxygenase | chr5:21945869-21948285 FORWARD	1.592
amino acid metabolism.degradation.aromatic aa.tryptophan	AT3G24360	enoyl-CoA hydratase/isomerase family protein | chr3:8839728-8842831 REVERSE	-1.147
Sulphate Assimilation
S-assimilation.APR	AT1G62180	APR2, APSR, PRH43, PRH, ATAPR2 | APR2 (5'ADENYLYLPHOSPHOSULFATE REDUCTASE 2); adenylyl-sulfate reductase/ phosphoadenylyl-sulfate reductase (thioredoxin) | chr1:22975530-22977602 REVERSE	-1.808
S-assimilation.APR	AT4G21990	APR3, PRH-26, PRH26, ATAPR3 | APR3 (APS REDUCTASE 3); adenylyl-sulfate reductase | chr4:11657008-11659105 REVERSE	-1.646
Metal handling
metal handling.acquisition	AT3G08040	FRD3, MAN1 | FRD3 (FERRIC REDUCTASE DEFECTIVE 3); antiporter/ transporter | chr3:2566277-2569499 REVERSE	-1.133
metal handling.acquisition	AT5G49730	ATFRO6, FRO6 | ATFRO6 (FERRIC REDUCTION OXIDASE 6); ferric-chelate reductase/ oxidoreductase | chr5:20201101-20204513 REVERSE	1.401
metal handling.acquisition	AT5G50160	ATFRO8, FRO8 | FRO8 (FERRIC REDUCTION OXIDASE 8); ferric-chelate reductase/ oxidoreductase | chr5:20415771-20418742 FORWARD	-1.206
metal handling.binding, chelation and storage	AT3G56090	ATFER3 | ATFER3 (ferritin 3); binding / ferric iron binding / oxidoreductase/ transition metal ion binding | chr3:20814047-20816035 REVERSE	-1.137
metal handling.binding, chelation and storage	AT4G38580	ATFP6, HIPP26 | ATFP6 (FARNESYLATED PROTEIN 6); metal ion binding | chr4:18034431-18035889 FORWARD	1.182
metal handling.binding, chelation and storage	AT5G04950	NAS1, ATNAS1 | NAS1 (NICOTIANAMINE SYNTHASE 1); nicotianamine synthase | chr5:1457645-1458890 REVERSE	1.564
Secondary metabolism
secondary metabolism.isoprenoids.tocopherol biosynthesis.hydroxyphenylpyruvate dioxygenase	AT1G06570	PDS1, HPD | PDS1 (PHYTOENE DESATURATION 1); 4-hydroxyphenylpyruvate dioxygenase | chr1:2011885-2013545 REVERSE	1.506
secondary metabolism.isoprenoids.terpenoids	AT1G61680	TPS14, ATTPS14 | TPS14 (TERPENE SYNTHASE 14); S-linalool synthase | chr1:22772455-22774687 REVERSE	-1.569
secondary metabolism.isoprenoids.terpenoids	AT4G20230	terpene synthase/cyclase family protein | chr4:10924121-10926758 REVERSE	-1.274
secondary metabolism.isoprenoids.terpenoids	AT5G44630	terpene synthase/cyclase family protein | chr5:18003255-18005616 FORWARD	-3.178
secondary metabolism.phenylpropanoids	AT1G77520	O-methyltransferase family 2 protein | chr1:29130403-29132180 FORWARD	-1.293
secondary metabolism.phenylpropanoids	AT1G77530	O-methyltransferase family 2 protein | chr1:29136037-29137555 FORWARD	-2.741
secondary metabolism.phenylpropanoids	AT2G23910	cinnamoyl-CoA reductase-related | chr2:10177834-10180064 FORWARD	-2.722
secondary metabolism.phenylpropanoids	AT4G31910	transferase family protein | chr4:15441082-15443900 FORWARD	-1.157
secondary metabolism.phenylpropanoids.lignin biosynthesis	AT3G50740	UGT72E1 | UGT72E1 (UDP-glucosyl transferase 72E1); UDP-glycosyltransferase/ coniferyl-alcohol glucosyltransferase/ transferase, transferring glycosyl groups | chr3:18855161-18856884 REVERSE	1.086
secondary metabolism.phenylpropanoids.lignin biosynthesis.CCoAOMT	AT1G67980	CCOAMT | CCoAMT; caffeoyl-CoA O-methyltransferase | chr1:25487714-25489231 FORWARD	2.558
secondary metabolism.N misc.alkaloid-like	AT2G29340	short-chain dehydrogenase/reductase (SDR) family protein | chr2:12597115-12599203 FORWARD	1.124
secondary metabolism.sulfur-containing.glucosinolates.degradation.nitrilase	AT3G44300	NIT2 | NIT2 (nitrilase 2); indole-3-acetonitrile nitrilase/ indole-3-acetonitrile nitrile hydratase/ nitrilase | chr3:15983311-15985535 FORWARD	1.133
secondary metabolism.wax	AT5G55380	membrane bound O-acyl transferase (MBOAT) family protein / wax synthase-related | chr5:22446624-22447898 REVERSE	-1.091
secondary metabolism.flavonoids.anthocyanins	AT2G39980	transferase family protein | chr2:16687673-16689956 REVERSE	1.467
secondary metabolism.flavonoids.anthocyanins	AT3G55970	oxidoreductase, 2OG-Fe(II) oxygenase family protein | chr3:20766735-20769324 REVERSE	1.693
secondary metabolism.flavonoids.anthocyanins	AT4G27570	glycosyltransferase family protein | chr4:13763464-13765064 REVERSE	-5.649
secondary metabolism.flavonoids.dihydroflavonols	AT5G24530	DMR6 | DMR6 (DOWNY MILDEW RESISTANT 6); oxidoreductase/ oxidoreductase, acting on paired donors, with incorporation or reduction of molecular oxygen, 2-oxoglutarate as one donor, and incorporation of one atom each of oxygen into both donors | chr5:8378833-8383401 FORWARD	1.801
secondary metabolism.simple phenols	AT5G01040	LAC8 | LAC8 (laccase 8); laccase | chr5:13128-16173 REVERSE	-1.121
Hormone metabolism
hormone metabolism.abscisic acid.synthesis-degradation.synthesis.9-cis-epoxycarotenoid dioxygenase	AT4G19170	NCED4 | NCED4 (NINE-CIS-EPOXYCAROTENOID DIOXYGENASE 4) | chr4:10481786-10483857 FORWARD	1.233
hormone metabolism.abscisic acid.signal transduction	AT3G63210	MARD1 | MARD1 | chr3:23353615-23355160 REVERSE	1.068
hormone metabolism.abscisic acid.signal transduction	AT4G34000	ABF3, DPBF5 | ABF3 (ABSCISIC ACID RESPONSIVE ELEMENTS-BINDING FACTOR 3); DNA binding / protein binding / transcription activator/ transcription factor | chr4:16295558-16298255 FORWARD	1.231
hormone metabolism.abscisic acid.induced-regulated-responsive-activated	AT2G17770	ATBZIP27, FDP | ATBZIP27; transcription factor | chr2:7723103-7724161 FORWARD	-1.13
hormone metabolism.abscisic acid.induced-regulated-responsive-activated	AT5G15960	KIN1 | KIN1 | chr5:5209898-5210727 FORWARD	2.465
hormone metabolism.abscisic acid.induced-regulated-responsive-activated	AT5G59220	protein phosphatase 2C, putative / PP2C, putative | chr5:23894404-23896619 REVERSE	1.214
hormone metabolism.auxin.synthesis-degradation	AT3G44300	NIT2 | NIT2 (nitrilase 2); indole-3-acetonitrile nitrilase/ indole-3-acetonitrile nitrile hydratase/ nitrilase | chr3:15983311-15985535 FORWARD	1.133
hormone metabolism.auxin.induced-regulated-responsive-activated	AT1G29460	auxin-responsive protein, putative | chr1:10307507-10308143 REVERSE	1.041
hormone metabolism.auxin.induced-regulated-responsive-activated	AT2G33830	dormancy/auxin associated family protein | chr2:14309484-14310351 REVERSE	1.506
hormone metabolism.auxin.induced-regulated-responsive-activated	AT3G03830	auxin-responsive protein, putative | chr3:979984-980488 REVERSE	1.379
hormone metabolism.auxin.induced-regulated-responsive-activated	AT3G15450	unknown protein | chr3:5212984-5214121 FORWARD	1.630
hormone metabolism.auxin.induced-regulated-responsive-activated	AT3G17600	IAA31 | IAA31 (INDOLE-3-ACETIC ACID INDUCIBLE 31); transcription factor | chr3:6020025-6021142 REVERSE	-5.284
hormone metabolism.auxin.induced-regulated-responsive-activated	AT4G00880	auxin-responsive family protein | chr4:366373-367274 REVERSE	-1.841
hormone metabolism.auxin.induced-regulated-responsive-activated	AT4G12410	auxin-responsive family protein | chr4:7342956-7343590 REVERSE	-2.408
hormone metabolism.auxin.induced-regulated-responsive-activated	AT4G22620	auxin-responsive family protein | chr4:11907631-11908113 FORWARD	2.056
hormone metabolism.auxin.induced-regulated-responsive-activated	AT4G27450	unknown protein | chr4:13727484-13728886 REVERSE	2.142
hormone metabolism.auxin.induced-regulated-responsive-activated	AT4G34810	auxin-responsive family protein | chr4:16599104-16599421 FORWARD	-1.603
hormone metabolism.auxin.induced-regulated-responsive-activated	AT5G18050	auxin-responsive protein, putative | chr5:5974567-5975054 REVERSE	1.434
hormone metabolism.brassinosteroid.synthesis-degradation.BRs.metabolic regulation	AT2G26710	BAS1, CYP734A1, CYP72B1 | BAS1 (PHYB ACTIVATION TAGGED SUPPRESSOR 1); oxygen binding / steroid hydroxylase | chr2:11380492-11383612 FORWARD	1.309
hormone metabolism.brassinosteroid.synthesis-degradation.BRs.other	AT3G13730	CYP90D1 | CYP90D1; oxidoreductase, acting on paired donors, with incorporation or reduction of molecular oxygen, NADH or NADPH as one donor, and incorporation of one atom of oxygen / oxygen binding | chr3:4497976-4500920 REVERSE	-1.069
hormone metabolism.brassinosteroid.synthesis-degradation.sterols.other	AT4G37760	SQE3 | SQE3 (squalene epoxidase 3); squalene monooxygenase | chr4:17743887-17746678 FORWARD	1.169
hormone metabolism.brassinosteroid.synthesis-degradation.sterols.other	AT5G24155	squalene monooxygenase, putative / squalene epoxidase, putative | chr5:8180118-8181027 REVERSE	1.094
hormone metabolism.brassinosteroid.signal transduction.other	AT2G17230	EXL5 | EXL5 (EXORDIUM LIKE 5) | chr2:7494536-7496016 REVERSE	-1.457
hormone metabolism.brassinosteroid.signal transduction.other	AT4G30610	BRS1, SCPL24 | BRS1 (BRI1 SUPPRESSOR 1); serine-type carboxypeptidase | chr4:14944129-14948605 FORWARD	-1.222
hormone metabolism.cytokinin.synthesis-degradation	AT1G68460	ATIPT1 | ATIPT1 (isopentenyltransferase 1); adenylate dimethylallyltransferase | chr1:25668610-25670182 REVERSE	-2.074
hormone metabolism.ethylene.synthesis-degradation	AT5G43440	2-oxoglutarate-dependent dioxygenase, putative | chr5:17455233-17456657 REVERSE	2.058
hormone metabolism.ethylene.synthesis-degradation	AT5G43450	2-oxoglutarate-dependent dioxygenase, putative | chr5:17457125-17458797 REVERSE	1.084
hormone metabolism.ethylene.signal transduction	AT1G04310	ERS2 | ERS2 (ETHYLENE RESPONSE SENSOR 2); ethylene binding / glycogen synthase kinase 3/ protein histidine kinase/ receptor | chr1:1154764-1157711 REVERSE	1.023
hormone metabolism.ethylene.signal transduction	AT1G06160	ORA59 | ORA59 (OCTADECANOID-RESPONSIVE ARABIDOPSIS AP2/ERF 59); DNA binding / transcription activator/ transcription factor | chr1:1883004-1883934 FORWARD	-2.495
hormone metabolism.ethylene.signal transduction	AT3G50260	CEJ1, ATERF#011 | CEJ1 (COOPERATIVELY REGULATED BY ETHYLENE AND JASMONATE 1); DNA binding / transcription factor | chr3:18634576-18635398 FORWARD	1.099
hormone metabolism.ethylene.induced-regulated-responsive-activated	AT2G31730	ethylene-responsive protein, putative | chr2:13487568-13489679 REVERSE	-1.053
hormone metabolism.ethylene.induced-regulated-responsive-activated	AT3G62550	universal stress protein (USP) family protein | chr3:23135984-23137173 FORWARD	2.235
hormone metabolism.ethylene.induced-regulated-responsive-activated	AT4G37150	ATMES9, MES9 | MES9 (METHYL ESTERASE 9); hydrolase, acting on ester bonds / methyl indole-3-acetate esterase/ methyl jasmonate esterase/ methyl salicylate esterase | chr4:17492878-17494109 REVERSE	1.282
hormone metabolism.gibberelin.synthesis-degradation	AT4G21200	ATGA2OX8, GA2OX8 | GA2OX8 (GIBBERELLIN 2-OXIDASE 8); gibberellin 2-beta-dioxygenase | chr4:11302685-11306601 FORWARD	-2.172
hormone metabolism.gibberelin.synthesis-degradation.GA20 oxidase	AT4G25420	GA5, GA20OX1, AT2301, ATGA20OX1 | GA20OX1; gibberellin 20-oxidase | chr4:12990884-12992458 REVERSE	1.622
hormone metabolism.gibberelin.synthesis-degradation.GA20 oxidase	AT5G51810	GA20OX2, AT2353, ATGA20OX2 | GA20OX2 (GIBBERELLIN 20 OXIDASE 2); gibberellin 20-oxidase | chr5:21055188-21056808 REVERSE	2.566
hormone metabolism.gibberelin.synthesis-degradation.GA2 oxidase	AT1G78440	ATGA2OX1 | ATGA2OX1 (gibberellin 2-oxidase 1); gibberellin 2-beta-dioxygenase | chr1:29511599-29513051 REVERSE	1.814
hormone metabolism.jasmonate.synthesis-degradation.12-Oxo-PDA-reductase	AT1G18020	12-oxophytodienoate reductase, putative | chr1:6202249-6203918 FORWARD	1.013
hormone metabolism.salicylic acid.synthesis-degradation	AT5G37990	S-adenosylmethionine-dependent methyltransferase/ methyltransferase | chr5:15133737-15135500 REVERSE	-1.243
hormone metabolism.salicylic acid.synthesis-degradation.synthesis.SA glucosyltransferase ether bond making SAG	AT2G43840	UGT74F1 | UDP-glucoronosyl/UDP-glucosyl transferase family protein | chr2:18157638-18159175 FORWARD	-1.245
hormone metabolism.salicylic acid.synthesis-degradation.synthesis.SA glucosyltransferase ester and ether bond making SGE, SAG	AT2G43820	GT, UGT74F2 | UGT74F2 (UDP-GLUCOSYLTRANSFERASE 74F2); UDP-glucose:4-aminobenzoate acylglucosyltransferase/ UDP-glucosyltransferase/ UDP-glycosyltransferase/ transferase, transferring glycosyl groups / transferase, transferring hexosyl groups | chr2:18152227-18153908 FORWARD	1.301
Co-factor and vitamine metabolism
Co-factor and vitamine metabolism.pantothenate.branched-chain amino acid aminotransferase	AT1G10070	ATBCAT-2 | ATBCAT-2 (ARABIDOPSIS THALIANA BRANCHED-CHAIN AMINO ACID TRANSAMINASE 2); branched-chain-amino-acid transaminase/ catalytic | chr1:3288087-3290471 FORWARD	2.267
Co-factor and vitamine metabolism.pantothenate.2-dehydropantoate 2-reductase	AT5G34780	dehydrogenase E1 component family protein | chr5:12961682-12963892 REVERSE	1.586
Stress response
stress.biotic	AT1G19610	LCR78, PDF1.4 | PDF1.4 | chr1:6781483-6782039 REVERSE	1.585
stress.biotic	AT1G20030	pathogenesis-related thaumatin family protein | chr1:6945425-6947344 FORWARD	1.478
stress.biotic	AT1G33970	avirulence-responsive protein, putative / avirulence induced gene protein, putative / AIG protein, putative | chr1:12349463-12351203 REVERSE	1.224
stress.biotic	AT1G58190	AtRLP9 | AtRLP9 (Receptor Like Protein 9); protein binding | chr1:21540720-21547996 FORWARD	1.006
stress.biotic	AT2G02130	PDF2.3, LCR68 | LCR68 (LOW-MOLECULAR-WEIGHT CYSTEINE-RICH 68); peptidase inhibitor | chr2:539999-540634 FORWARD	-1.115
stress.biotic	AT2G15130	plant basic secretory protein (BSP) family protein | chr2:6564945-6566004 FORWARD	-2.518
stress.biotic	AT3G23190	lesion inducing protein-related | chr3:8279289-8280912 FORWARD	-1.49
stress.biotic	AT3G48080	lipase class 3 family protein / disease resistance protein-related | chr3:17752938-17755190 REVERSE	1.386
stress.biotic	AT4G19820	glycosyl hydrolase family 18 protein | chr4:10767436-10768614 REVERSE	-1.158
stress.biotic	AT4G25780	pathogenesis-related protein, putative | chr4:13121068-13121955 FORWARD	-1.126
stress.biotic.respiratory burst	AT5G51060	RHD2, ATRBOHC, RBOHC | RHD2 (ROOT HAIR DEFECTIVE 2); NAD(P)H oxidase | chr5:20757284-20762431 REVERSE	-1.557
stress.biotic.signalling	AT1G33960	AIG1 | AIG1 (AVRRPT2-INDUCED GENE 1); GTP binding | chr1:12346232-12348513 FORWARD	1.744
stress.biotic.signalling.MLO-like	AT5G65970	MLO10, ATMLO10 | MLO10 (MILDEW RESISTANCE LOCUS O 10); calmodulin binding | chr5:26387428-26390452 REVERSE	-1.099
stress.biotic.regulation of transcription	AT5G64900	PROPEP1, ATPEP1 | PROPEP1 | chr5:25937170-25938093 FORWARD	-1.119
stress.biotic.PR-proteins	AT2G15080	AtRLP19 | AtRLP19 (Receptor Like Protein 19); kinase/ protein binding | chr2:6533687-6536995 FORWARD	1.068
stress.biotic.PR-proteins	AT2G32680	AtRLP23 | AtRLP23 (Receptor Like Protein 23); kinase/ protein binding | chr2:13859769-13862614 REVERSE	1.594
stress.biotic.PR-proteins	AT4G09420	disease resistance protein (TIR-NBS class), putative | chr4:5962181-5963791 REVERSE	-1.152
stress.biotic.PR-proteins	AT4G16880	disease resistance protein-related | chr4:9496187-9498926 REVERSE	1.395
stress.biotic.PR-proteins	AT5G40100	disease resistance protein (TIR-NBS-LRR class), putative | chr5:16043929-16047355 FORWARD	-1.344
stress.biotic.PR-proteins.plant defensins	AT1G13609	Encodes a defensin-like (DEFL) family protein. | chr1:4662721-4663192 FORWARD	-1.652
stress.biotic.PR-proteins.plant defensins	AT2G42885	Encodes a defensin-like (DEFL) family protein. | chr2:17845967-17846603 REVERSE	-5.865
stress.biotic.PR-proteins.plant defensins	AT3G59930	Encodes a defensin-like (DEFL) family protein. | chr3:22139551-22140320 REVERSE	2.284
stress.biotic.PR-proteins.plant defensins	AT5G44420	PDF1.2, PDF1.2A, LCR77 | PDF1.2 | chr5:17907069-17907598 REVERSE	3.604
stress.abiotic	AT2G24550	unknown protein | chr2:10427856-10429222 REVERSE	1.213
stress.abiotic	AT3G47860	apolipoprotein D-related | chr3:17656670-17658316 REVERSE	-1.176
stress.abiotic.heat	AT1G09080	BIP3 | BIP3; ATP binding | chr1:2929217-2931841 REVERSE	1.217
stress.abiotic.heat	AT1G77020	DNAJ heat shock N-terminal domain-containing protein | chr1:28944843-28947031 REVERSE	-1.581
stress.abiotic.heat	AT1G80920	J8 | J8; heat shock protein binding / unfolded protein binding | chr1:30403644-30404690 REVERSE	1.869
stress.abiotic.heat	AT2G17880	DNAJ heat shock protein, putative | chr2:7766962-7767931 REVERSE	1.456
stress.abiotic.heat	AT3G09700	DNAJ heat shock N-terminal domain-containing protein | chr3:2974802-2976277 REVERSE	-1.065
stress.abiotic.heat	AT4G13830	J20 | J20 (DNAJ-LIKE 20); heat shock protein binding | chr4:8011424-8012780 FORWARD	1.268
stress.abiotic.heat	AT4G21870	26.5 kDa class P-related heat shock protein (HSP26.5-P) | chr4:11603568-11604331 REVERSE	-2.053
stress.abiotic.heat	AT4G36040	DNAJ heat shock N-terminal domain-containing protein (J11) | chr4:17049171-17050274 REVERSE	1.567
stress.abiotic.heat	AT5G16650	DNAJ heat shock N-terminal domain-containing protein | chr5:5463177-5465331 REVERSE	1.224
stress.abiotic.cold	AT2G42540	COR15A, COR15 | COR15A (COLD-REGULATED 15A) | chr2:17711037-17712092 REVERSE	2.357
stress.abiotic.cold	AT5G23950	C2 domain-containing protein | chr5:8082744-8083604 FORWARD	2.641
stress.abiotic.cold	AT5G52310	COR78, LTI78, RD29A, LTI140 | LTI78 (LOW-TEMPERATURE-INDUCED 78) | chr5:21240849-21243613 FORWARD	2.378
stress.abiotic.drought/salt	AT1G13930	Involved in response to salt stress. Knockout mutants are hypersensitive to salt stress. | chr1:4761042-4761725 FORWARD	1.124
stress.abiotic.drought/salt	AT3G54510	early-responsive to dehydration protein-related / ERD protein-related | chr3:20180292-20183509 FORWARD	1.308
stress.abiotic.drought/salt	AT4G30650	hydrophobic protein, putative / low temperature and salt responsive protein, putative | chr4:14954320-14954968 FORWARD	1.064
stress.abiotic.touch/wounding	AT4G28240	wound-responsive protein-related | chr4:13997292-13998347 REVERSE	1.446
stress.abiotic.unspecified	AT1G20440	COR47, RD17 | COR47 (COLD-REGULATED 47) | chr1:7084409-7085772 REVERSE	1.875
stress.abiotic.unspecified	AT1G20450	LTI29, LTI45, ERD10 | ERD10 (EARLY RESPONSIVE TO DEHYDRATION 10); actin binding | chr1:7088003-7089606 REVERSE	1.350
stress.abiotic.unspecified	AT1G76180	ERD14 | ERD14 (EARLY RESPONSE TO DEHYDRATION 14); calcium ion binding | chr1:28586773-28587877 REVERSE	1.107
stress.abiotic.unspecified	AT2G01520	MLP328 | MLP328 (MLP-LIKE PROTEIN 328); copper ion binding | chr2:235925-237147 FORWARD	-1.208
stress.abiotic.unspecified	AT2G40330	Bet v I allergen family protein | chr2:16844864-16845934 REVERSE	-2.445
stress.abiotic.unspecified	AT3G26460	major latex protein-related / MLP-related | chr3:9683873-9684657 REVERSE	-1.208
stress.abiotic.unspecified	AT3G50970	LTI30, XERO2 | LTI30 (LOW TEMPERATURE-INDUCED 30) | chr3:18940777-18941554 FORWARD	1.402
stress.abiotic.unspecified	AT4G38410	dehydrin, putative | chr4:17980940-17981719 FORWARD	4.954
stress.abiotic.unspecified	AT5G20630	GLP3, GLP3A, GLP3B, ATGER3, GER3 | GER3 (GERMIN 3); oxalate oxidase | chr5:6975104-6975993 REVERSE	-1.336
stress.abiotic.unspecified	AT5G66400	RAB18, ATDI8 | RAB18 (RESPONSIVE TO ABA 18) | chr5:26518297-26519242 REVERSE	2.768
stress.abiotic.unspecified	AT5G66590	allergen V5/Tpx-1-related family protein | chr5:26574181-26574874 FORWARD	1.378
Redox regulation
redox.thioredoxin	AT1G52990	thioredoxin family protein | chr1:19740503-19743449 REVERSE	-1.694
redox.thioredoxin	AT5G61440	ACHT5 | ACHT5 (ATYPICAL CYS HIS RICH THIOREDOXIN 5) | chr5:24707500-24708893 FORWARD	-1.228
redox.ascorbate and glutathione	AT4G18260	cytochrome B561-related | chr4:10093524-10097503 REVERSE	-1.045
redox.heme	AT3G10520	AHB2, GLB2, ARATH GLB2, NSHB2 | AHB2 (ARABIDOPSIS HAEMOGLOBIN 2); oxygen transporter | chr3:3276226-3277860 REVERSE	-1.218
redox.glutaredoxins	AT1G03850	glutaredoxin family protein | chr1:976097-977761 REVERSE	2.005
redox.glutaredoxins	AT1G06830	glutaredoxin family protein | chr1:2097151-2097655 FORWARD	-2.345
redox.glutaredoxins	AT2G41330	glutaredoxin family protein | chr2:17226948-17228378 FORWARD	-1.357
redox.glutaredoxins	AT4G33040	glutaredoxin family protein | chr4:15940561-15941330 REVERSE	-1.277
redox.glutaredoxins	AT5G11930	glutaredoxin family protein | chr5:3844940-3845645 REVERSE	-1.096
redox.peroxiredoxin	AT1G65970	TPX2 | TPX2 (thioredoxin-dependent peroxidase 2); antioxidant/ oxidoreductase | chr1:24557372-24558322 REVERSE	1.549
redox.dismutases and catalases	AT1G20620	CAT3, SEN2, ATCAT3 | CAT3 (CATALASE 3); catalase | chr1:7143067-7146540 FORWARD	1.106
Nucleotide metabolism
nucleotide metabolism.synthesis.purine.amidophosphoribosyltransferase	AT2G16570	ATASE, ATASE1 | ATASE1 (GLN PHOSPHORIBOSYL PYROPHOSPHATE AMIDOTRANSFERASE 1); amidophosphoribosyltransferase | chr2:7180145-7182193 REVERSE	-1.348
nucleotide metabolism.degradation	AT1G14240	nucleoside phosphatase family protein / GDA1/CD39 family protein | chr1:4865005-4868000 FORWARD	-1.057
nucleotide metabolism.degradation	AT1G14250	nucleoside phosphatase family protein / GDA1/CD39 family protein | chr1:4868452-4871488 FORWARD	1.570
nucleotide metabolism.degradation	AT5G28050	cytidine/deoxycytidylate deaminase family protein | chr5:10043914-10045882 REVERSE	1.024
nucleotide metabolism.salvage.NUDIX hydrolases	AT1G14860	atnudt18 | atnudt18 (Arabidopsis thaliana Nudix hydrolase homolog 18); hydrolase | chr1:5124742-5126151 FORWARD	1.217
Biodegradation of Xenobiotics
Biodegradation of Xenobiotics.hydroxyacylglutathione hydrolase	AT1G53580	GLX2-3, ETHE1, GLY3 | GLY3 (GLYOXALASE II 3); hydrolase/ hydroxyacylglutathione hydrolase | chr1:19991275-19993334 REVERSE	1.447
Biodegradation of Xenobiotics.lactoylglutathione lyase	AT1G80160	lactoylglutathione lyase family protein / glyoxalase I family protein | chr1:30151003-30152190 FORWARD	1.344
Miscellaneous enzyme families
misc.UDP glucosyl and glucoronyl transferases	AT1G11730	galactosyltransferase family protein | chr1:3957473-3960113 FORWARD	-1.248
misc.UDP glucosyl and glucoronyl transferases	AT2G16890	UDP-glucoronosyl/UDP-glucosyl transferase family protein | chr2:7316889-7319181 FORWARD	-1.11
misc.UDP glucosyl and glucoronyl transferases	AT2G36970	UDP-glucoronosyl/UDP-glucosyl transferase family protein | chr2:15529006-15530749 FORWARD	-1.586
misc.UDP glucosyl and glucoronyl transferases	AT3G46690	UDP-glucoronosyl/UDP-glucosyl transferase family protein | chr3:17197626-17199337 REVERSE	1.297
misc.UDP glucosyl and glucoronyl transferases	AT4G02130	GATL6, LGT10 | GATL6; polygalacturonate 4-alpha-galacturonosyltransferase/ transferase, transferring glycosyl groups / transferase, transferring hexosyl groups | chr4:944367-947085 REVERSE	-1.359
misc.UDP glucosyl and glucoronyl transferases	AT4G34138	UGT73B1 | UGT73B1 (UDP-glucosyl transferase 73B1); UDP-glycosyltransferase/ abscisic acid glucosyltransferase/ quercetin 3-O-glucosyltransferase/ quercetin 7-O-glucosyltransferase | chr4:16348106-16349982 REVERSE	1.127
misc.UDP glucosyl and glucoronyl transferases	AT4G37690	galactosyl transferase GMA12/MNN10 family protein | chr4:17707894-17709847 FORWARD	1.031
misc.UDP glucosyl and glucoronyl transferases	AT5G05880	UDP-glucoronosyl/UDP-glucosyl transferase family protein | chr5:1769648-1771515 FORWARD	1.014
misc.UDP glucosyl and glucoronyl transferases	AT5G11610	exostosin family protein | chr5:3735440-3738217 REVERSE	1.442
misc.gluco-, galacto- and mannosidases	AT2G44480	BGLU17 | BGLU17 (BETA GLUCOSIDASE 17); catalytic/ cation binding / hydrolase, hydrolyzing O-glycosyl compounds | chr2:18359734-18363088 FORWARD	1.244
misc.gluco-, galacto- and mannosidases	AT3G03640	GLUC, BGLU25 | BGLU25 (BETA GLUCOSIDASE 25); catalytic/ cation binding / hydrolase, hydrolyzing O-glycosyl compounds | chr3:881006-884157 FORWARD	1.246
misc.gluco-, galacto- and mannosidases.beta-galactosidase	AT3G13750	BGAL1 | BGAL1 (Beta galactosidase 1); beta-galactosidase/ catalytic/ cation binding / heme binding / peroxidase/ sugar binding | chr3:4510965-4516298 FORWARD	1.269
misc.gluco-, galacto- and mannosidases.beta-galactosidase	AT5G20710	BGAL7 | BGAL7 (beta-galactosidase 7); beta-galactosidase | chr5:7010522-7014249 FORWARD	-1.056
misc.gluco-, galacto- and mannosidases.beta-galactosidase	AT5G56870	BGAL4 | BGAL4 (beta-galactosidase 4); beta-galactosidase | chr5:23004196-23008649 FORWARD	2.415
misc.gluco-, galacto- and mannosidases.beta-galactosidase	AT5G63800	MUM2, BGAL6 | MUM2 (MUCILAGE-MODIFIED 2); beta-galactosidase | chr5:25530055-25535849 FORWARD	1.218
misc.gluco-, galacto- and mannosidases.endoglucanase	AT4G24260	ATGH9A3, KOR3 | ATGH9A3 (ARABIDOPSIS THALIANA GLYCOSYL HYDROLASE 9A3); catalytic/ hydrolase, hydrolyzing O-glycosyl compounds | chr4:12577871-12580133 REVERSE	-1.975
misc.beta 1,3 glucan hydrolases	AT2G30933	FUNCTIONS IN: molecular_function unknown; INVOLVED IN: biological_process unknown; LOCATED IN: endomembrane system; CONTAINS InterPro DOMAIN/s: X8 (InterPro:IPR012946); BEST Arabidopsis thaliana protein match is: unknown protein (TAIR:AT1G29380.1); Has 799 Blast hits to 763 proteins in 42 species: Archae - 0; Bacteria - 0; Metazoa - 0; Fungi - 23; Plants - 773; Viruses - 0; Other Eukaryotes - 3 (…	-1.115
misc.beta 1,3 glucan hydrolases.glucan endo-1,3-beta-glucosidase	AT3G57260	BGL2, PR2, BG2, PR-2 | BGL2 (BETA-1,3-GLUCANASE 2); cellulase/ glucan 1,3-beta-glucosidase/ hydrolase, hydrolyzing O-glycosyl compounds | chr3:21188517-21189859 REVERSE	1.243
misc.O-methyl transferases	AT1G15125	S-adenosylmethionine-dependent methyltransferase/ methyltransferase | chr1:5204625-5205912 FORWARD	1.145
misc.oxidases - copper, flavone etc	AT1G14120	2-oxoglutarate-dependent dioxygenase, putative | chr1:4833518-4835089 REVERSE	-1.422
misc.oxidases - copper, flavone etc	AT1G31690	amine oxidase/ copper ion binding / quinone binding | chr1:11343980-11347767 FORWARD	-2.096
misc.oxidases - copper, flavone etc	AT5G37940	NADP-dependent oxidoreductase, putative | chr5:15107296-15108966 FORWARD	-3.748
misc.nitrilases, *nitrile lyases, berberine bridge enzymes, reticuline oxidases, troponine reductases	AT1G26380	FAD-binding domain-containing protein | chr1:9126737-9128528 REVERSE	1.611
misc.nitrilases, *nitrile lyases, berberine bridge enzymes, reticuline oxidases, troponine reductases	AT1G26420	FAD-binding domain-containing protein | chr1:9141567-9143304 REVERSE	1.571
misc.nitrilases, *nitrile lyases, berberine bridge enzymes, reticuline oxidases, troponine reductases	AT1G30720	FAD-binding domain-containing protein | chr1:10898172-10899912 FORWARD	1.592
misc.nitrilases, *nitrile lyases, berberine bridge enzymes, reticuline oxidases, troponine reductases	AT1G30730	FAD-binding domain-containing protein | chr1:10900854-10902534 FORWARD	1.952
misc.nitrilases, *nitrile lyases, berberine bridge enzymes, reticuline oxidases, troponine reductases	AT2G23560	ATMES7, MES7 | MES7 (METHYL ESTERASE 7); hydrolase/ hydrolase, acting on ester bonds / methyl indole-3-acetate esterase/ methyl salicylate esterase | chr2:10029275-10030382 REVERSE	-1.574
misc.nitrilases, *nitrile lyases, berberine bridge enzymes, reticuline oxidases, troponine reductases	AT2G29300	tropinone reductase, putative / tropine dehydrogenase, putative | chr2:12588197-12589539 FORWARD	1.452
misc.nitrilases, *nitrile lyases, berberine bridge enzymes, reticuline oxidases, troponine reductases	AT2G29340	short-chain dehydrogenase/reductase (SDR) family protein | chr2:12597115-12599203 FORWARD	1.124
misc.nitrilases, *nitrile lyases, berberine bridge enzymes, reticuline oxidases, troponine reductases	AT4G16690	ATMES16, MES16 | MES16 (METHYL ESTERASE 16); catalytic/ hydrolase, acting on ester bonds / methyl indole-3-acetate esterase/ methyl jasmonate esterase | chr4:9392147-9393529 REVERSE	1.137
misc.nitrilases, *nitrile lyases, berberine bridge enzymes, reticuline oxidases, troponine reductases	AT4G20860	FAD-binding domain-containing protein | chr4:11172622-11174467 FORWARD	1.073
misc.nitrilases, *nitrile lyases, berberine bridge enzymes, reticuline oxidases, troponine reductases	AT4G37150	ATMES9, MES9 | MES9 (METHYL ESTERASE 9); hydrolase, acting on ester bonds / methyl indole-3-acetate esterase/ methyl jasmonate esterase/ methyl salicylate esterase | chr4:17492878-17494109 REVERSE	1.282
misc.nitrilases, *nitrile lyases, berberine bridge enzymes, reticuline oxidases, troponine reductases	AT5G58310	ATMES18, MES18 | MES18 (METHYL ESTERASE 18); hydrolase/ hydrolase, acting on ester bonds / methyl indole-3-acetate esterase | chr5:23574992-23576084 REVERSE	-1.43
misc.glutathione S transferases	AT1G10370	GST30, ATGSTU17, GST30B, ERD9 | ERD9 (EARLY-RESPONSIVE TO DEHYDRATION 9); glutathione transferase | chr1:3397081-3398358 REVERSE	2.146
misc.glutathione S transferases	AT2G02930	ATGSTF3, GST16 | ATGSTF3 (GLUTATHIONE S-TRANSFERASE F3); glutathione transferase | chr2:851164-852222 REVERSE	1.224
misc.glutathione S transferases	AT3G43800	ATGSTU27 | ATGSTU27 (GLUTATHIONE S-TRANSFERASE TAU 27); glutathione transferase | chr3:15660859-15661925 FORWARD	-1.054
misc.glutathione S transferases	AT4G02520	ATGSTF2, ATPM24.1, ATPM24, GST2 | ATGSTF2 (GLUTATHIONE S-TRANSFERASE PHI 2); glutathione binding / glutathione transferase | chr4:1110452-1111660 REVERSE	1.016
misc.cytochrome P450	AT1G01190	CYP78A8 | CYP78A8; electron carrier/ heme binding / iron ion binding / monooxygenase/ oxygen binding | chr1:83045-84864 REVERSE	-2.018
misc.cytochrome P450	AT1G33720	CYP76C6 | CYP76C6; electron carrier/ heme binding / iron ion binding / monooxygenase/ oxygen binding | chr1:12220897-12224000 REVERSE	1.331
misc.cytochrome P450	AT2G34500	CYP710A1 | CYP710A1 (cytochrome P450, family 710, subfamily A, polypeptide 1); C-22 sterol desaturase/ oxygen binding | chr2:14539479-14541406 REVERSE	1.343
misc.cytochrome P450	AT3G26210	CYP71B23 | CYP71B23; electron carrier/ heme binding / iron ion binding / monooxygenase/ oxygen binding | chr3:9593132-9595243 REVERSE	1.251
misc.cytochrome P450	AT3G26220	CYP71B3 | CYP71B3; electron carrier/ heme binding / iron ion binding / monooxygenase/ oxygen binding | chr3:9596077-9597833 REVERSE	1.499
misc.cytochrome P450	AT3G26230	CYP71B24 | CYP71B24; electron carrier/ heme binding / iron ion binding / monooxygenase/ oxygen binding | chr3:9598005-9599959 REVERSE	1.229
misc.cytochrome P450	AT3G26280	CYP71B4 | CYP71B4; electron carrier/ heme binding / iron ion binding / monooxygenase/ oxygen binding | chr3:9630200-9632009 REVERSE	1.406
misc.cytochrome P450	AT3G26290	CYP71B26 | CYP71B26; electron carrier/ heme binding / iron ion binding / monooxygenase/ oxygen binding | chr3:9632682-9634470 REVERSE	1.645
misc.cytochrome P450	AT3G28740	CYP81D1 | CYP81D1; electron carrier/ heme binding / iron ion binding / monooxygenase/ oxygen binding | chr3:10788698-10790553 REVERSE	1.048
misc.cytochrome P450	AT3G48280	CYP71A25 | CYP71A25; electron carrier/ heme binding / iron ion binding / monooxygenase/ oxygen binding | chr3:17879566-17881312 FORWARD	-1.186
misc.cytochrome P450	AT4G15396	CYP702A6 | CYP702A6; electron carrier/ heme binding / iron ion binding / monooxygenase | chr4:8807527-8810512 FORWARD	2.100
misc.cytochrome P450	AT4G20240	CYP71A27 | CYP71A27; electron carrier/ heme binding / iron ion binding / monooxygenase/ oxygen binding | chr4:10931493-10934212 REVERSE	-1.79
misc.cytochrome P450	AT5G44620	CYP706A3 | CYP706A3; electron carrier/ heme binding / iron ion binding / monooxygenase/ oxygen binding | chr5:17997779-17999558 REVERSE	-1.379
misc.peroxidases	AT4G16270	peroxidase 40 (PER40) (P40) | chr4:9205016-9206552 FORWARD	-2.605
misc.peroxidases	AT5G39580	peroxidase, putative | chr5:15847081-15849108 REVERSE	2.013
misc.acid and other phosphatases	AT1G17710	phosphatase | chr1:6090560-6092027 REVERSE	-1.182
misc.acid and other phosphatases	AT2G01890	PAP8, ATPAP8 | PAP8 (PURPLE ACID PHOSPHATASE 8); acid phosphatase/ protein serine/threonine phosphatase | chr2:396768-399208 REVERSE	1.263
misc.acid and other phosphatases	AT4G14930	acid phosphatase survival protein SurE, putative | chr4:8538586-8541899 FORWARD	1.222
misc.acid and other phosphatases	AT5G45700	NLI interacting factor (NIF) family protein | chr5:18537349-18538196 FORWARD	-1.439
misc.myrosinases-lectin-jacalin	AT3G61060	AtPP2-A13 | AtPP2-A13 (Arabidopsis thaliana phloem protein 2-A13); carbohydrate binding | chr3:22602910-22604578 FORWARD	1.283
misc.dynamin	AT3G19720	ARC5 | ARC5 (ACCUMULATION AND REPLICATION OF CHLOROPLAST 5); GTP binding / GTPase | chr3:6850371-6855513 REVERSE	1.152
misc.invertase/pectin methylesterase inhibitor family protein	AT1G62760	invertase/pectin methylesterase inhibitor family protein | chr1:23237574-23238512 REVERSE	1.550
misc.invertase/pectin methylesterase inhibitor family protein	AT3G47380	invertase/pectin methylesterase inhibitor family protein | chr3:17457795-17458570 FORWARD	1.168
misc.invertase/pectin methylesterase inhibitor family protein	AT5G64620	C/VIF2, ATC/VIF2 | C/VIF2 (CELL WALL / VACUOLAR INHIBITOR OF FRUCTOSIDASE 2); enzyme inhibitor/ pectinesterase/ pectinesterase inhibitor | chr5:25831834-25832502 FORWARD	-1.621
misc.plastocyanin-like	AT3G01070	plastocyanin-like domain-containing protein | chr3:19592-20719 FORWARD	-1.14
misc.plastocyanin-like	AT5G20230	ATBCB, BCB | ATBCB (ARABIDOPSIS BLUE-COPPER-BINDING PROTEIN); copper ion binding / electron carrier | chr5:6826506-6827629 FORWARD	1.078
misc.protease inhibitor/seed storage/lipid transfer protein (LTP) family protein	AT1G62500	protease inhibitor/seed storage/lipid transfer protein (LTP) family protein | chr1:23132045-23133502 FORWARD	-1.092
misc.protease inhibitor/seed storage/lipid transfer protein (LTP) family protein	AT1G62510	protease inhibitor/seed storage/lipid transfer protein (LTP) family protein | chr1:23136369-23137191 REVERSE	1.189
misc.protease inhibitor/seed storage/lipid transfer protein (LTP) family protein	AT4G00165	protease inhibitor/seed storage/lipid transfer protein (LTP) family protein | chr4:69273-69875 REVERSE	-1.804
misc.protease inhibitor/seed storage/lipid transfer protein (LTP) family protein	AT5G62080	protease inhibitor/seed storage/lipid transfer protein (LTP) family protein | chr5:24933471-24934445 REVERSE	-6.139
misc.short chain dehydrogenase/reductase (SDR)	AT4G24050	short-chain dehydrogenase/reductase (SDR) family protein | chr4:12497055-12500128 FORWARD	1.274
misc.GCN5-related N-acetyltransferase	AT2G39030	GCN5-related N-acetyltransferase (GNAT) family protein | chr2:16298227-16299202 FORWARD	2.494
misc.GDSL-motif lipase	AT1G53990	GLIP3 | GLIP3; carboxylesterase/ lipase | chr1:20151016-20152752 FORWARD	3.294
misc.GDSL-motif lipase	AT1G58430	RXF26 | RXF26; carboxylesterase/ hydrolase, acting on ester bonds | chr1:21711565-21713103 REVERSE	-6.153
misc.GDSL-motif lipase	AT5G33370	GDSL-motif lipase/hydrolase family protein | chr5:12602468-12604764 REVERSE	-3.216
RNA-involving processes
RNA.processing.splicing	AT5G18810	SCL28 | SCL28; RNA binding / nucleic acid binding / nucleotide binding | chr5:6268718-6271325 REVERSE	-1.025
RNA.processing.RNA helicase	AT3G58570	DEAD box RNA helicase, putative | chr3:21656504-21660532 FORWARD	-1.175
RNA.processing.RNA helicase	AT4G16680	RNA helicase, putative | chr4:9388071-9390774 REVERSE	1.060
RNA.processing.ribonucleases	AT5G45150	RTL3 | RTL3 (RNase three-like protein 3); RNA binding / double-stranded RNA binding / ribonuclease III | chr5:18260441-18264346 FORWARD	-1.376
RNA.regulation of transcription.ABI3/VP1-related B3-domain-containing transcription factor family	AT2G36080	DNA-binding protein, putative | chr2:15148259-15151575 REVERSE	1.255
RNA.regulation of transcription.ABI3/VP1-related B3-domain-containing transcription factor family	AT4G21550	VAL3 | VAL3 (VP1/ABI3-LIKE 3); transcription factor | chr4:11463987-11468679 FORWARD	-1.054
RNA.regulation of transcription.AP2/EREBP, APETALA2/Ethylene-responsive element binding protein family	AT1G03800	ERF10, ATERF10 | ERF10 (ERF DOMAIN PROTEIN 10); DNA binding / transcription factor/ transcription repressor | chr1:957261-957998 REVERSE	1.214
RNA.regulation of transcription.AP2/EREBP, APETALA2/Ethylene-responsive element binding protein family	AT1G68550	AP2 domain-containing transcription factor, putative | chr1:25725455-25727701 REVERSE	-1.062
RNA.regulation of transcription.AP2/EREBP, APETALA2/Ethylene-responsive element binding protein family	AT1G77200	AP2 domain-containing transcription factor TINY, putative | chr1:29004357-29005091 REVERSE	1.259
RNA.regulation of transcription.AP2/EREBP, APETALA2/Ethylene-responsive element binding protein family	AT2G20880	AP2 domain-containing transcription factor, putative | chr2:8985973-8987263 FORWARD	4.972
RNA.regulation of transcription.AP2/EREBP, APETALA2/Ethylene-responsive element binding protein family	AT3G25890	AP2 domain-containing transcription factor, putative | chr3:9475575-9477455 FORWARD	-1.255
RNA.regulation of transcription.AP2/EREBP, APETALA2/Ethylene-responsive element binding protein family	AT4G11140	CRF1 | CRF1 (CYTOKININ RESPONSE FACTOR 1); DNA binding / transcription factor | chr4:6794776-6795793 REVERSE	-1.156
RNA.regulation of transcription.AP2/EREBP, APETALA2/Ethylene-responsive element binding protein family	AT4G23750	CRF2 | CRF2 (CYTOKININ RESPONSE FACTOR 2); DNA binding / transcription factor | chr4:12376194-12378024 FORWARD	-1.297
RNA.regulation of transcription.AP2/EREBP, APETALA2/Ethylene-responsive element binding protein family	AT4G28140	AP2 domain-containing transcription factor, putative | chr4:13974691-13975908 REVERSE	4.711
RNA.regulation of transcription.AP2/EREBP, APETALA2/Ethylene-responsive element binding protein family	AT4G36900	RAP2.10 | RAP2.10 (related to AP2 10); DNA binding / transcription factor | chr4:17388814-17389837 FORWARD	1.474
RNA.regulation of transcription.ARR	AT2G40670	ARR16, RR16 | ARR16 (ARABIDOPSIS RESPONSE REGULATOR 16); transcription regulator/ two-component response regulator | chr2:16970258-16971207 FORWARD	-1.521
RNA.regulation of transcription.bHLH,Basic Helix-Loop-Helix family	AT1G22490	basic helix-loop-helix (bHLH) family protein | chr1:7938251-7940592 REVERSE	1.333
RNA.regulation of transcription.bHLH,Basic Helix-Loop-Helix family	AT2G40200	basic helix-loop-helix (bHLH) family protein | chr2:16791098-16792090 FORWARD	-1.101
RNA.regulation of transcription.bHLH,Basic Helix-Loop-Helix family	AT2G46970	PIL1 | PIL1 (PHYTOCHROME INTERACTING FACTOR 3-LIKE 1); transcription factor | chr2:19295490-19297826 REVERSE	1.626
RNA.regulation of transcription.bHLH,Basic Helix-Loop-Helix family	AT3G22100	basic helix-loop-helix (bHLH) family protein | chr3:7783711-7784469 REVERSE	1.259
RNA.regulation of transcription.bHLH,Basic Helix-Loop-Helix family	AT3G56980	BHLH039, ORG3 | BHLH039; DNA binding / transcription factor | chr3:21086546-21087494 REVERSE	-2.042
RNA.regulation of transcription.bHLH,Basic Helix-Loop-Helix family	AT3G59060	PIL6, PIF5 | PIL6 (PHYTOCHROME INTERACTING FACTOR 3-LIKE 6); DNA binding / transcription factor | chr3:21827978-21830507 REVERSE	1.668
RNA.regulation of transcription.bHLH,Basic Helix-Loop-Helix family	AT5G15160	bHLH family protein | chr5:4921266-4922648 REVERSE	1.736
RNA.regulation of transcription.bHLH,Basic Helix-Loop-Helix family	AT5G39860	PRE1 | PRE1 (PACLOBUTRAZOL RESISTANCE1); DNA binding / transcription factor | chr5:15957417-15958455 FORWARD	1.187
RNA.regulation of transcription.bHLH,Basic Helix-Loop-Helix family	AT5G41315	GL3, MYC6.2 | GL3 (GLABROUS 3); protein binding / transcription factor | chr5:16529455-16532879 FORWARD	-1.5
RNA.regulation of transcription.C2C2(Zn) CO-like, Constans-like zinc finger family	AT3G07650	COL9 | COL9 (CONSTANS-LIKE 9); transcription factor/ zinc ion binding | chr3:2441657-2444532 FORWARD	-2.119
RNA.regulation of transcription.C2C2(Zn) CO-like, Constans-like zinc finger family	AT4G27310	zinc finger (B-box type) family protein | chr4:13675638-13676910 FORWARD	1.396
RNA.regulation of transcription.C2C2(Zn) CO-like, Constans-like zinc finger family	AT5G48250	zinc finger (B-box type) family protein | chr5:19561319-19563722 REVERSE	-1.56
RNA.regulation of transcription.C2C2(Zn) CO-like, Constans-like zinc finger family	AT5G57660	ATCOL5, COL5 | zinc finger (B-box type) family protein | chr5:23355464-23356989 FORWARD	1.925
RNA.regulation of transcription.C2C2(Zn) DOF zinc finger family	AT1G26790	Dof-type zinc finger domain-containing protein | chr1:9273857-9275312 REVERSE	-1.551
RNA.regulation of transcription.C2C2(Zn) DOF zinc finger family	AT2G34140	Dof-type zinc finger domain-containing protein | chr2:14413758-14414765 REVERSE	-1.82
RNA.regulation of transcription.C2C2(Zn) DOF zinc finger family	AT5G60850	OBP4 | OBP4; DNA binding / transcription factor | chr5:24480449-24481873 FORWARD	1.339
RNA.regulation of transcription.C2C2(Zn) GATA transcription factor family	AT3G16870	zinc finger (GATA type) family protein | chr3:5763586-5764654 REVERSE	-1.1
RNA.regulation of transcription.C2C2(Zn) GATA transcription factor family	AT3G60530	zinc finger (GATA type) family protein | chr3:22373215-22374387 FORWARD	1.159
RNA.regulation of transcription.C2C2(Zn) GATA transcription factor family	AT5G42700	transcriptional factor B3 family protein | chr5:17122171-17124353 FORWARD	-1.065
RNA.regulation of transcription.C2C2(Zn) YABBY family	AT1G69180	CRC | CRC (CRABS CLAW); transcription factor | chr1:26007465-26009059 REVERSE	-3.666
RNA.regulation of transcription.C2H2 zinc finger family	AT1G49900	zinc finger (C2H2 type) family protein | chr1:18473908-18477643 REVERSE	1.787
RNA.regulation of transcription.C2H2 zinc finger family	AT3G42860	zinc knuckle (CCHC-type) family protein | chr3:14946188-14948167 REVERSE	-1.029
RNA.regulation of transcription.C2H2 zinc finger family	AT3G45260	zinc finger (C2H2 type) family protein | chr3:16596381-16598698 REVERSE	1.053
RNA.regulation of transcription.C2H2 zinc finger family	AT3G46080	zinc finger (C2H2 type) family protein | chr3:16922753-16923247 REVERSE	1.371
RNA.regulation of transcription.C2H2 zinc finger family	AT3G49930	zinc finger (C2H2 type) family protein | chr3:18510246-18510963 FORWARD	-2.827
RNA.regulation of transcription.C2H2 zinc finger family	AT5G43170	AZF3 | AZF3 (ARABIDOPSIS ZINC-FINGER PROTEIN 3); DNA binding / nucleic acid binding / transcription factor/ transcription repressor/ zinc ion binding | chr5:17330945-17331646 REVERSE	-1.108
RNA.regulation of transcription.C3H zinc finger family	AT2G19810	zinc finger (CCCH-type) family protein | chr2:8550313-8551858 FORWARD	1.145
RNA.regulation of transcription.C3H zinc finger family	AT2G25900	ATCTH | ATCTH; transcription factor | chr2:11041718-11043171 FORWARD	1.581
RNA.regulation of transcription.C3H zinc finger family	AT4G29190	zinc finger (CCCH-type) family protein | chr4:14391938-14393373 REVERSE	1.481
RNA.regulation of transcription.C3H zinc finger family	AT5G44260	zinc finger (CCCH-type) family protein | chr5:17829626-17831225 REVERSE	1.894
RNA.regulation of transcription.G2-like transcription factor family, GARP	AT1G13300	myb family transcription factor | chr1:4556892-4558708 FORWARD	3.290
RNA.regulation of transcription.G2-like transcription factor family, GARP	AT2G03500	myb family transcription factor | chr2:1059710-1062410 FORWARD	-1.14
RNA.regulation of transcription.G2-like transcription factor family, GARP	AT5G59570	myb family transcription factor | chr5:24003888-24005512 FORWARD	-1.899
RNA.regulation of transcription.HB,Homeobox transcription factor family	AT2G46680	ATHB-7, ATHB7 | ATHB-7 (ARABIDOPSIS THALIANA HOMEOBOX 7); transcription activator/ transcription factor | chr2:19165403-19166949 REVERSE	1.051
RNA.regulation of transcription.HB,Homeobox transcription factor family	AT3G18010	WOX1 | WOX1 (WUSCHEL related homeobox 1); transcription factor | chr3:6161137-6163272 REVERSE	1.014
RNA.regulation of transcription.HB,Homeobox transcription factor family	AT3G60390	HAT3 | HAT3 (HOMEOBOX-LEUCINE ZIPPER PROTEIN 3); transcription factor | chr3:22320595-22322586 REVERSE	1.067
RNA.regulation of transcription.HB,Homeobox transcription factor family	AT3G61890	ATHB-12, ATHB12 | ATHB-12 (ARABIDOPSIS THALIANA HOMEOBOX 12); transcription activator/ transcription factor | chr3:22914154-22915325 REVERSE	1.245
RNA.regulation of transcription.HB,Homeobox transcription factor family	AT4G16780	ATHB-2, HAT4, ATHB2 | ATHB-2 (ARABIDOPSIS THALIANA HOMEOBOX PROTEIN 2); DNA binding / protein homodimerization/ sequence-specific DNA binding / transcription factor | chr4:9449114-9450743 FORWARD	1.462
RNA.regulation of transcription.HB,Homeobox transcription factor family	AT4G34610	BLH6 | BLH6 (BELL1-LIKE HOMEODOMAIN 6); DNA binding / transcription factor | chr4:16530346-16533034 REVERSE	-1.365
RNA.regulation of transcription.HB,Homeobox transcription factor family	AT5G03790	ATHB51, LMI1, HB51 | HB51; DNA binding / sequence-specific DNA binding / transcription factor | chr5:1004983-1006373 FORWARD	-1.178
RNA.regulation of transcription.HSF,Heat-shock transcription factor family	AT5G43840	AT-HSFA6A, HSFA6A | AT-HSFA6A; DNA binding / transcription factor | chr5:17625437-17626364 REVERSE	2.249
RNA.regulation of transcription.MADS box transcription factor family	AT1G24260	SEP3, AGL9 | SEP3 (SEPALLATA3); DNA binding / protein binding / transcription factor | chr1:8593642-8596098 REVERSE	-2.678
RNA.regulation of transcription.MADS box transcription factor family	AT5G15800	SEP1, AGL2 | SEP1 (SEPALLATA1); DNA binding / transcription factor | chr5:5151334-5154154 REVERSE	-1.427
RNA.regulation of transcription.MADS box transcription factor family	AT5G26630	MADS-box protein (AGL35) | chr5:9350815-9351471 FORWARD	-1.397
RNA.regulation of transcription.MYB domain transcription factor family	AT1G25360	pentatricopeptide (PPR) repeat-containing protein | chr1:8894428-8896800 FORWARD	-1.013
RNA.regulation of transcription.MYB domain transcription factor family	AT2G47190	ATMYB2, MYB2 | MYB2 (MYB DOMAIN PROTEIN 2); DNA binding / calmodulin binding / transcription activator/ transcription factor | chr2:19376202-19377531 FORWARD	1.585
RNA.regulation of transcription.MYB domain transcription factor family	AT3G10113	myb family transcription factor | chr3:3118043-3119391 REVERSE	1.714
RNA.regulation of transcription.MYB domain transcription factor family	AT4G05100	AtMYB74 | AtMYB74 (myb domain protein 74); DNA binding / transcription factor | chr4:2618454-2619887 FORWARD	1.514
RNA.regulation of transcription.MYB domain transcription factor family	AT4G21440	ATMYB102, ATM4 | ATMYB102 (ARABIDOPSIS MYB-LIKE 102); DNA binding / transcription factor | chr4:11418246-11419760 REVERSE	1.899
RNA.regulation of transcription.MYB-related transcription factor family	AT1G18330	EPR1 | EPR1 (EARLY-PHYTOCHROME-RESPONSIVE1); DNA binding / transcription factor | chr1:6305971-6308010 REVERSE	1.669
RNA.regulation of transcription.MYB-related transcription factor family	AT1G71030	ATMYBL2, MYBL2 | MYBL2 (ARABIDOPSIS MYB-LIKE 2); DNA binding / transcription factor | chr1:26795123-26796364 REVERSE	2.802
RNA.regulation of transcription.MYB-related transcription factor family	AT1G74840	myb family transcription factor | chr1:28115897-28117405 REVERSE	1.435
RNA.regulation of transcription.MYB-related transcription factor family	AT2G21650	MEE3, ATRL2 | MEE3 (MATERNAL EFFECT EMBRYO ARREST 3); DNA binding / transcription factor | chr2:9259583-9260656 FORWARD	-1.307
RNA.regulation of transcription.MYB-related transcription factor family	AT4G36570	ATRL3 | ATRL3 (ARABIDOPSIS RAD-LIKE 3); DNA binding / transcription factor | chr4:17254660-17255716 FORWARD	-1.392
RNA.regulation of transcription.MYB-related transcription factor family	AT4G39250	ATRL1 | ATRL1 (ARABIDOPSIS RAD-LIKE 1); DNA binding / transcription factor | chr4:18271457-18271857 REVERSE	-3.379
RNA.regulation of transcription.MYB-related transcription factor family	AT5G37260	RVE2, CIR1 | RVE2 (REVEILLE 2); DNA binding / transcription factor | chr5:14751344-14753088 REVERSE	-2.661
RNA.regulation of transcription.MYB-related transcription factor family	AT5G56840	DNA-binding family protein | chr5:22980693-22982342 FORWARD	-1.883
RNA.regulation of transcription.MYB-related transcription factor family	AT5G58900	myb family transcription factor | chr5:23783123-23785334 REVERSE	-1.003
RNA.regulation of transcription.NAC domain transcription factor family	AT3G04070	anac047 | anac047 (Arabidopsis NAC domain containing protein 47); transcription factor | chr3:1061526-1063103 REVERSE	1.122
RNA.regulation of transcription.NAC domain transcription factor family	AT3G15500	ATNAC3, ANAC055 | ANAC055 (ARABIDOPSIS NAC DOMAIN CONTAINING PROTEIN 55); transcription factor | chr3:5234617-5236088 FORWARD	1.294
RNA.regulation of transcription.Trihelix, Triple-Helix transcription factor family	AT4G29030	glycine-rich protein | chr4:14307249-14307973 FORWARD	-1.011
RNA.regulation of transcription.WRKY domain transcription factor family	AT2G30250	WRKY25, ATWRKY25 | WRKY25; transcription factor | chr2:12903236-12905198 REVERSE	1.023
RNA.regulation of transcription.WRKY domain transcription factor family	AT5G07100	WRKY26 | WRKY26; transcription factor | chr5:2204248-2205811 FORWARD	1.260
RNA.regulation of transcription.bZIP transcription factor family	AT1G13600	AtbZIP58 | AtbZIP58 (Arabidopsis thaliana basic leucine-zipper 58); DNA binding / protein heterodimerization/ protein homodimerization/ transcription factor | chr1:4650787-4651469 REVERSE	-1.157
RNA.regulation of transcription.bZIP transcription factor family	AT1G22070	TGA3 | TGA3; DNA binding / calmodulin binding / protein binding / transcription factor | chr1:7789348-7792114 FORWARD	1.094
RNA.regulation of transcription.bZIP transcription factor family	AT2G36270	ABI5, GIA1 | ABI5 (ABA INSENSITIVE 5); DNA binding / transcription activator/ transcription factor | chr2:15204764-15207528 REVERSE	1.215
RNA.regulation of transcription.bZIP transcription factor family	AT4G34590	ATB2, GBF6, AtbZIP11, BZIP11 | GBF6 (G-BOX BINDING FACTOR 6); DNA binding / protein heterodimerization/ transcription factor | chr4:16521861-16523230 FORWARD	-2.128
RNA.regulation of transcription.bZIP transcription factor family	AT4G35900	FD, FD-1, atbzip14 | FD; DNA binding / protein binding / transcription activator/ transcription factor | chr4:17004595-17006287 FORWARD	-1.036
RNA.regulation of transcription.bZIP transcription factor family	AT5G49450	AtbZIP1 | AtbZIP1 (Arabidopsis thaliana basic leucine-zipper 1); DNA binding / protein heterodimerization/ transcription factor | chr5:20051829-20052735 FORWARD	1.415
RNA.regulation of transcription.Aux/IAA family	AT4G14550	IAA14, SLR | IAA14 (INDOLE-3-ACETIC ACID INDUCIBLE 14); protein binding / transcription factor/ transcription repressor | chr4:8347822-8350019 REVERSE	1.208
RNA.regulation of transcription.Aux/IAA family	AT4G32280	IAA29 | IAA29 (INDOLE-3-ACETIC ACID INDUCIBLE 29); transcription factor | chr4:15583387-15584769 FORWARD	1.422
RNA.regulation of transcription.Aux/IAA family	AT5G25890	IAA28, IAR2 | IAA28 (INDOLE-3-ACETIC ACID INDUCIBLE 28); transcription factor | chr5:9033415-9034834 FORWARD	-1.312
RNA.regulation of transcription.B3 transcription factor family	AT1G16640	transcriptional factor B3 family protein | chr1:5686603-5687715 FORWARD	-1.47
RNA.regulation of transcription.B3 transcription factor family	AT1G49475	DNA binding / transcription factor | chr1:18312920-18314016 FORWARD	-2.438
RNA.regulation of transcription.B3 transcription factor family	AT2G24700	transcriptional factor B3 family protein | chr2:10513016-10515411 REVERSE	-1.084
RNA.regulation of transcription.B3 transcription factor family	AT3G06160	transcriptional factor B3 family protein | chr3:1864326-1867192 FORWARD	-1.089
RNA.regulation of transcription.B3 transcription factor family	AT4G31610	REM1, ATREM1 | REM1 (REPRODUCTIVE MERISTEM 1); DNA binding / transcription factor | chr4:15317499-15320020 FORWARD	-2.195
RNA.regulation of transcription.DNA methyltransferases	AT4G14140	MET2, DMT02, DMT2, MET02 | DMT2 (DNA METHYLTRANSFERASE 2); DNA (cytosine-5-)-methyltransferase/ DNA binding / protein binding | chr4:8146345-8152131 FORWARD	-1.627
RNA.regulation of transcription.General Transcription	AT3G52270	ATP binding / RNA polymerase II transcription factor | chr3:19387180-19388944 REVERSE	-1.774
RNA.regulation of transcription.Histone acetyltransferases	AT1G16705	p300/CBP acetyltransferase-related protein-related | chr1:5712088-5713752 FORWARD	-2.807
RNA.regulation of transcription.HDA	AT2G27840	HDT4, HDA13, HDT04 | HDT4; histone deacetylase | chr2:11861994-11863884 FORWARD	-1.02
RNA.regulation of transcription.JUMONJI family	AT3G20810	transcription factor jumonji (jmjC) domain-containing protein | chr3:7275674-7278379 FORWARD	-1.41
RNA.regulation of transcription.Psudo ARR transcription factor family	AT2G46790	APRR9, PRR9, TL1 | APRR9 (ARABIDOPSIS PSEUDO-RESPONSE REGULATOR 9); protein binding / transcription regulator/ two-component response regulator | chr2:19232649-19235087 FORWARD	2.477
RNA.regulation of transcription.Psudo ARR transcription factor family	AT5G02810	PRR7, APRR7 | PRR7 (PSEUDO-RESPONSE REGULATOR 7); transcription regulator/ two-component response regulator | chr5:637897-641977 REVERSE	1.763
RNA.regulation of transcription.Psudo ARR transcription factor family	AT5G24470	APRR5, PRR5 | APRR5 (ARABIDOPSIS PSEUDO-RESPONSE REGULATOR 5); transcription regulator/ two-component response regulator | chr5:8355951-8358873 REVERSE	1.238
RNA.regulation of transcription.Psudo ARR transcription factor family	AT5G60100	APRR3, PRR3 | APRR3 (ARABIDOPSIS PSEUDO-RESPONSE REGULATOR 3); transcription regulator/ two-component response regulator | chr5:24197999-24201364 REVERSE	-2.364
RNA.regulation of transcription.putative transcription regulator	AT1G63295	Remorin family protein; CONTAINS InterPro DOMAIN/s: Remorin, C-terminal (InterPro:IPR005516); BEST Arabidopsis thaliana protein match is: Remorin family protein (TAIR:AT3G61260.1).	-1.103
RNA.regulation of transcription.putative transcription regulator	AT2G20710	pentatricopeptide (PPR) repeat-containing protein | chr2:8926033-8927844 FORWARD	-1.952
RNA.regulation of transcription.putative transcription regulator	AT2G41870	remorin family protein | chr2:17470866-17472936 REVERSE	1.370
RNA.regulation of transcription.putative transcription regulator	AT3G49410	unknown protein | chr3:18324746-18329191 FORWARD	-1.074
RNA.regulation of transcription.putative transcription regulator	AT4G12540	unknown protein | chr4:7429876-7431602 REVERSE	-1.176
RNA.regulation of transcription.putative transcription regulator	AT4G22770	DNA-binding family protein | chr4:11963628-11965684 REVERSE	-1.569
RNA.regulation of transcription.putative transcription regulator	AT5G43500	ATARP9 | ATARP9 (ACTIN-RELATED PROTEIN 9); protein binding | chr5:17469675-17473591 FORWARD	-1.985
RNA.regulation of transcription.putative transcription regulator	AT5G54930	AT hook motif-containing protein | chr5:22305734-22307564 REVERSE	-1.217
RNA.regulation of transcription.unclassified	AT1G02450	NIMIN1, NIMIN-1 | NIMIN1 (NIM1-INTERACTING 1); protein binding | chr1:497976-498516 REVERSE	-1.041
RNA.regulation of transcription.unclassified	AT1G21000	zinc-binding family protein | chr1:7337728-7339452 FORWARD	1.184
RNA.regulation of transcription.unclassified	AT1G76590	zinc-binding family protein | chr1:28740691-28742207 FORWARD	1.956
RNA.regulation of transcription.unclassified	AT2G01818	zinc ion binding | chr2:353457-355522 REVERSE	-1.09
RNA.regulation of transcription.unclassified	AT2G36320	zinc finger (AN1-like) family protein | chr2:15228788-15230496 FORWARD	1.035
RNA.regulation of transcription.unclassified	AT2G42980	aspartyl protease family protein | chr2:17875005-17876588 REVERSE	-1.119
RNA.regulation of transcription.unclassified	AT2G46670	pseudo-response regulator, putative / timing of CAB expression 1-like protein, putative | chr2:19164414-19165233 REVERSE	2.804
RNA.regulation of transcription.unclassified	AT4G19050	ATP binding / protein binding | chr4:10440102-10443786 REVERSE	-1.04
RNA.RNA binding	AT1G29400	AML5 | AML5 (ARABIDOPSIS MEI2-LIKE PROTEIN 5); RNA binding / nucleic acid binding / nucleotide binding | chr1:10290040-10294478 REVERSE	1.089
RNA.RNA binding	AT2G21660	ATGRP7, CCR2, GR-RBP7, GRP7 | CCR2 (COLD, CIRCADIAN RHYTHM, AND RNA BINDING 2); RNA binding / double-stranded DNA binding / single-stranded DNA binding | chr2:9265249-9266393 REVERSE	-1.422
RNA.RNA binding	AT4G13860	glycine-rich RNA-binding protein, putative | chr4:8022601-8023162 FORWARD	-1.247
DNA-involving processes
DNA.synthesis/chromatin structure	AT1G47510	AT5PTASE11, 5PTASE11 | 5PTASE11 (INOSITOL POLYPHOSPHATE 5-PHOSPHATASE 11); hydrolase/ phosphatidylinositol-3,4,5-trisphosphate 5-phosphatase/ phosphatidylinositol-3,5-bisphosphate 5-phosphatase/ phosphatidylinositol-4,5-bisphosphate 5-phosphatase | chr1:17435601-17438396 REVERSE	1.256
DNA.synthesis/chromatin structure	AT1G49450	transducin family protein / WD-40 repeat family protein | chr1:18305541-18307557 FORWARD	1.730
DNA.synthesis/chromatin structure	AT2G23840	HNH endonuclease domain-containing protein | chr2:10153797-10155647 REVERSE	1.781
DNA.synthesis/chromatin structure.histone.core.H2B	AT2G28720	histone H2B, putative | chr2:12326978-12327678 FORWARD	1.034
DNA.repair	AT1G80420	DNA repair protein, putative (XRCC1) | chr1:30235220-30237716 REVERSE	1.090
DNA.repair	AT2G28560	ATRAD51B, RAD51B | RAD51B; recombinase | chr2:12237052-12239086 REVERSE	-1.134
DNA.repair	AT4G35520	MLH3, ATMLH3 | MLH3 (MUTL PROTEIN HOMOLOG 3); ATP binding / mismatched DNA binding | chr4:16865488-16871764 FORWARD	-1.137
DNA.unspecified	AT2G36110	3'-5' exonuclease domain-containing protein | chr2:15161702-15162676 FORWARD	-1.024
Protein synthesis/degradation/modification
protein.aa activation.threonine-tRNA ligase	AT1G17960	threonyl-tRNA synthetase, putative / threonine--tRNA ligase, putative | chr1:6180896-6183806 REVERSE	-1.217
protein.synthesis.ribosomal protein.eukaryotic.40S subunit.SA	AT3G04770	RPSAb | RPSAb (40S ribosomal protein SA B); structural constituent of ribosome | chr3:1309294-1310887 REVERSE	-1.147
protein.synthesis.ribosomal protein.eukaryotic.60S subunit.P2	AT3G28500	60S acidic ribosomal protein P2 (RPP2C) | chr3:10682097-10682731 FORWARD	-1.982
protein.synthesis.ribosomal protein.unknown.unknown	AT1G54740	FUNCTIONS IN: molecular_function unknown; INVOLVED IN: biological_process unknown; EXPRESSED IN: 21 plant structures; EXPRESSED DURING: 14 growth stages; BEST Arabidopsis thaliana protein match is: structural constituent of ribosome (TAIR:AT1G22110.1); Has 479 Blast hits to 317 proteins in 60 species: Archae - 0; Bacteria - 25; Metazoa - 81; Fungi - 16; Plants - 88; Viruses - 0; Other Eukaryotes …	1.533
protein.synthesis.initiation	AT1G51380	eukaryotic translation initiation factor 4A, putative / eIF-4A, putative | chr1:19047882-19050162 FORWARD	-1.234
protein.targeting.mitochondria	AT1G20350	ATTIM17-1 | ATTIM17-1; P-P-bond-hydrolysis-driven protein transmembrane transporter/ protein transporter | chr1:7043713-7044592 FORWARD	1.462
protein.targeting.mitochondria	AT3G10110	MEE67 | MEE67 (maternal effect embryo arrest 67); P-P-bond-hydrolysis-driven protein transmembrane transporter/ protein transporter | chr3:3116110-3117671 FORWARD	-1.243
protein.targeting.mitochondria	AT4G26670	mitochondrial import inner membrane translocase subunit Tim17/Tim22/Tim23 family protein | chr4:13452117-13453984 FORWARD	-1.21
protein.postranslational modification	AT1G44478	FUNCTIONS IN: molecular_function unknown; INVOLVED IN: biological_process unknown; LOCATED IN: cellular_component unknown; BEST Arabidopsis thaliana protein match is: CYP59 (CYCLOPHILIN 59); RNA binding / nucleic acid binding / peptidyl-prolyl cis-trans isomerase (TAIR:AT1G53720.1); Has 293 Blast hits to 276 proteins in 65 species: Archae - 0; Bacteria - 0; Metazoa - 216; Fungi - 11; Plants - 38;…	6.818
protein.postranslational modification	AT2G23030	SNRK2-9, SNRK2.9 | SNRK2.9 (SNF1-RELATED PROTEIN KINASE 2.9); ATP binding / kinase/ protein kinase/ protein serine/threonine kinase | chr2:9803492-9806700 REVERSE	1.593
protein.postranslational modification	AT2G26980	CIPK3 | CIPK3 (CBL-INTERACTING PROTEIN KINASE 3); kinase/ protein kinase/ protein serine/threonine kinase | chr2:11514703-11518505 REVERSE	1.202
protein.postranslational modification	AT3G05640	protein phosphatase 2C, putative / PP2C, putative | chr3:1640393-1643253 REVERSE	2.665
protein.postranslational modification	AT3G16800	protein phosphatase 2C, putative / PP2C, putative | chr3:5721020-5723185 FORWARD	1.011
protein.postranslational modification	AT3G17510	CIPK1, SnRK3.16 | CIPK1 (CBL-INTERACTING PROTEIN KINASE 1); kinase/ protein binding | chr3:5988991-5992912 REVERSE	1.382
protein.postranslational modification	AT4G02710	kinase interacting family protein | chr4:1193516-1197061 REVERSE	-1.221
protein.postranslational modification	AT5G21170	5'-AMP-activated protein kinase beta-2 subunit, putative | chr5:7205667-7208496 FORWARD	1.201
protein.postranslational modification	AT5G25110	CIPK25, SnRK3.25 | CIPK25 (CBL-INTERACTING PROTEIN KINASE 25); ATP binding / kinase/ protein kinase/ protein serine/threonine kinase | chr5:8657626-8659322 REVERSE	1.472
protein.postranslational modification	AT5G43380	TOPP6 | TOPP6; protein serine/threonine phosphatase | chr5:17420048-17421982 REVERSE	-1.904
protein.postranslational modification	AT5G45820	CIPK20, SnRK3.6, PKS18 | CIPK20 (CBL-INTERACTING PROTEIN KINASE 20); kinase/ protein serine/threonine kinase | chr5:18586980-18588543 REVERSE	2.227
protein.postranslational modification	AT5G57630	CIPK21, SnRK3.4 | CIPK21 (CBL-interacting protein kinase 21); ATP binding / kinase/ protein kinase/ protein serine/threonine kinase | chr5:23340847-23343258 REVERSE	1.282
protein.postranslational modification	AT5G65600	legume lectin family protein / protein kinase family protein | chr5:26216126-26218153 REVERSE	1.204
protein.postranslational modification.kinase	AT4G11890	protein kinase family protein | chr4:7148246-7149921 FORWARD	2.363
protein.postranslational modification.kinase.receptor like cytoplasmatic kinase VII	AT1G20650	ATP binding / protein kinase/ protein serine/threonine kinase | chr1:7158244-7160526 REVERSE	1.051
protein.postranslational modification.kinase.receptor like cytoplasmatic kinase VIII	AT1G48210	serine/threonine protein kinase, putative | chr1:17798431-17801987 FORWARD	-1.112
protein.degradation.subtilases	AT3G14067	subtilase family protein | chr3:4658198-4660784 REVERSE	1.123
protein.degradation.subtilases	AT5G58840	subtilase family protein | chr5:23759003-23762059 FORWARD	-1.39
protein.degradation.cysteine protease	AT2G27420	cysteine proteinase, putative | chr2:11726144-11727614 REVERSE	-1.858
protein.degradation.cysteine protease	AT3G19390	cysteine proteinase, putative / thiol protease, putative | chr3:6722989-6725027 FORWARD	1.179
protein.degradation.cysteine protease	AT4G00690	ULP1B | ULP1B (UB-LIKE PROTEASE 1B); cysteine-type peptidase | chr4:281645-283129 FORWARD	-1.169
protein.degradation.cysteine protease	AT4G11310	cysteine proteinase, putative | chr4:6883551-6885517 FORWARD	-2.121
protein.degradation.cysteine protease	AT4G39090	RD19, RD19A | RD19 (RESPONSIVE TO DEHYDRATION 19); cysteine-type endopeptidase/ cysteine-type peptidase | chr4:18215556-18217482 REVERSE	1.685
protein.degradation.aspartate protease	AT1G25510	aspartyl protease family protein | chr1:8959186-8960848 REVERSE	-1.021
protein.degradation.aspartate protease	AT4G16563	aspartyl protease family protein | chr4:9329657-9331523 REVERSE	-2.489
protein.degradation.serine protease	AT5G47040	LON2 | LON2 (LON PROTEASE 2); ATP binding / ATP-dependent peptidase/ nucleoside-triphosphatase/ nucleotide binding / serine-type endopeptidase/ serine-type peptidase | chr5:19093152-19098715 REVERSE	1.294
protein.degradation.AAA type	AT1G43910	AAA-type ATPase family protein | chr1:16655884-16657658 REVERSE	-1.061
protein.degradation.ubiquitin	AT1G65130	ubiquitin carboxyl-terminal hydrolase-related | chr1:24196472-24201022 REVERSE	-1.527
protein.degradation.ubiquitin	AT2G34230	FUNCTIONS IN: molecular_function unknown; INVOLVED IN: biological_process unknown; LOCATED IN: cellular_component unknown; EXPRESSED IN: flower; EXPRESSED DURING: petal differentiation and expansion stage; CONTAINS InterPro DOMAIN/s: Protein of unknown function DUF627 (InterPro:IPR006866), Protein of unknown function DUF629 (InterPro:IPR006865); BEST Arabidopsis thaliana protein match is: MEE20 (…	-1.53
protein.degradation.ubiquitin.ubiquitin	AT5G14360	ubiquitin family protein | chr5:4630997-4631742 FORWARD	1.228
protein.degradation.ubiquitin.E3.RING	AT1G02610	zinc finger (C3HC4-type RING finger) family protein | chr1:553181-555854 REVERSE	1.471
protein.degradation.ubiquitin.E3.RING	AT1G22500	zinc finger (C3HC4-type RING finger) family protein | chr1:7949476-7950900 FORWARD	1.613
protein.degradation.ubiquitin.E3.RING	AT1G24440	protein binding / zinc ion binding | chr1:8662019-8663964 FORWARD	1.247
protein.degradation.ubiquitin.E3.RING	AT1G26800	zinc finger (C3HC4-type RING finger) family protein | chr1:9285099-9286324 REVERSE	1.164
protein.degradation.ubiquitin.E3.RING	AT1G49230	zinc finger (C3HC4-type RING finger) family protein | chr1:18209261-18210128 FORWARD	-2.953
protein.degradation.ubiquitin.E3.RING	AT1G60190	armadillo/beta-catenin repeat family protein / U-box domain-containing protein | chr1:22198403-22200678 FORWARD	1.044
protein.degradation.ubiquitin.E3.RING	AT1G68180	zinc finger (C3HC4-type RING finger) family protein | chr1:25554721-25555661 FORWARD	-2.707
protein.degradation.ubiquitin.E3.RING	AT1G76410	ATL8 | ATL8; protein binding / zinc ion binding | chr1:28668848-28669646 FORWARD	1.115
protein.degradation.ubiquitin.E3.RING	AT1G79110	protein binding / zinc ion binding | chr1:29759158-29760691 FORWARD	-1.262
protein.degradation.ubiquitin.E3.RING	AT4G01023	zinc finger (C3HC4-type RING finger) family protein | chr4:445844-446720 FORWARD	3.396
protein.degradation.ubiquitin.E3.RING	AT4G03510	RMA1 | RMA1; protein binding / ubiquitin-protein ligase/ zinc ion binding | chr4:1557120-1559428 REVERSE	1.545
protein.degradation.ubiquitin.E3.RING	AT4G15975	protein binding / zinc ion binding | chr4:9052175-9053152 FORWARD	-1.136
protein.degradation.ubiquitin.E3.RING	AT4G17245	zinc finger (C3HC4-type RING finger) family protein | chr4:9669365-9670005 FORWARD	1.103
protein.degradation.ubiquitin.E3.RING	AT4G17905	ATL4H | ATL4H; protein binding / zinc ion binding | chr4:9948853-9949785 REVERSE	-1.434
protein.degradation.ubiquitin.E3.RING	AT4G23450	zinc finger (C3HC4-type RING finger) family protein | chr4:12240803-12242706 REVERSE	1.027
protein.degradation.ubiquitin.E3.RING	AT4G28270	zinc finger (C3HC4-type RING finger) family protein | chr4:14007539-14009019 REVERSE	1.139
protein.degradation.ubiquitin.E3.RING	AT5G01520	zinc finger (C3HC4-type RING finger) family protein | chr5:206432-208611 FORWARD	1.804
protein.degradation.ubiquitin.E3.RING	AT5G01880	zinc finger (C3HC4-type RING finger) family protein | chr5:338899-340253 FORWARD	1.723
protein.degradation.ubiquitin.E3.RING	AT5G22920	zinc finger (C3HC4-type RING finger) family protein | chr5:7664991-7667265 FORWARD	1.382
protein.degradation.ubiquitin.E3.RING	AT5G55970	zinc finger (C3HC4-type RING finger) family protein | chr5:22667906-22669545 FORWARD	1.148
protein.degradation.ubiquitin.E3.SCF.SKP	AT5G57900	SKIP1 | SKIP1 (SKP1 INTERACTING PARTNER 1); protein binding | chr5:23449711-23450933 REVERSE	1.032
protein.degradation.ubiquitin.E3.SCF.FBOX	AT1G23390	kelch repeat-containing F-box family protein | chr1:8309112-8310649 REVERSE	1.790
protein.degradation.ubiquitin.E3.SCF.FBOX	AT1G27420	kelch repeat-containing F-box family protein | chr1:9519108-9520520 FORWARD	-1.074
protein.degradation.ubiquitin.E3.SCF.FBOX	AT1G80110	ATPP2-B11 | ATPP2-B11 (ARABIDOPSIS THALIANA PHLOEM PROTEIN 2-B11); carbohydrate binding | chr1:30135381-30136956 FORWARD	1.361
protein.degradation.ubiquitin.E3.SCF.FBOX	AT1G80440	kelch repeat-containing F-box family protein | chr1:30241607-30243071 FORWARD	2.087
protein.degradation.ubiquitin.E3.SCF.FBOX	AT4G33160	ubiquitin-protein ligase | chr4:15994089-15995655 FORWARD	-1.069
protein.degradation.ubiquitin.E3.SCF.FBOX	AT5G10340	F-box protein-related / SLF-related | chr5:3253122-3255045 FORWARD	2.071
protein.degradation.ubiquitin.E3.BTB/POZ Cullin3.BTB/POZ	AT3G48360	BT2, ATBT2 | BT2 (BTB AND TAZ DOMAIN PROTEIN 2); protein binding / transcription factor/ transcription regulator | chr3:17908192-17910525 REVERSE	4.324
protein.degradation.ubiquitin.E3.BTB/POZ Cullin3.BTB/POZ	AT5G63160	BT1 | BT1 (BTB AND TAZ DOMAIN PROTEIN 1); protein binding / transcription regulator | chr5:25333263-25335485 REVERSE	2.961
protein.glycosylation	AT1G08280	glycosyl transferase family 29 protein / sialyltransferase family protein | chr1:2608408-2609853 FORWARD	-1.01
Signalling
signalling.in sugar and nutrient physiology	AT3G12890	ASML2 | ASML2 (ACTIVATOR OF SPOMIN::LUC2); transcription activator | chr3:4099199-4100473 FORWARD	-1.226
signalling.in sugar and nutrient physiology	AT5G09440	EXL4 | EXL4 (EXORDIUM LIKE 4) | chr5:2938347-2939461 FORWARD	1.693
signalling.receptor kinases.leucine rich repeat I	AT2G19190	FRK1 | FRK1 (FLG22-INDUCED RECEPTOR-LIKE KINASE 1); kinase | chr2:8326049-8329944 REVERSE	1.561
signalling.receptor kinases.leucine rich repeat II	AT2G23950	leucine-rich repeat family protein / protein kinase family protein | chr2:10187043-10190412 REVERSE	-1.174
signalling.receptor kinases.leucine rich repeat III	AT5G61570	protein kinase family protein | chr5:24758347-24760652 FORWARD	-1.523
signalling.receptor kinases.leucine rich repeat VI	AT5G45840	leucine-rich repeat transmembrane protein kinase, putative | chr5:18594080-18597221 REVERSE	1.329
signalling.receptor kinases.DUF 26	AT2G33330	PDLP3 | PDLP3 (PLASMODESMATA-LOCATED PROTEIN 3) | chr2:14122890-14125137 REVERSE	-1.531
signalling.receptor kinases.DUF 26	AT4G11460	protein kinase family protein | chr4:6964468-6967093 FORWARD	-1.653
signalling.receptor kinases.DUF 26	AT4G11890	protein kinase family protein | chr4:7148246-7149921 FORWARD	2.363
signalling.receptor kinases.DUF 26	AT4G23210	CRK13 | protein kinase family protein | chr4:12148714-12151479 REVERSE	1.004
signalling.receptor kinases.legume-lectin	AT2G32800	AP4.3A | AP4.3A; ATP binding / protein kinase/ protein serine/threonine kinase/ protein tyrosine kinase | chr2:13916452-13919179 FORWARD	1.130
signalling.receptor kinases.S-locus glycoprotein like	AT1G61390	S-locus protein kinase, putative | chr1:22650338-22653639 REVERSE	-1.244
signalling.receptor kinases.S-locus glycoprotein like	AT1G65790	ARK1 | ARK1 (A. THALIANA RECEPTOR KINASE 1); kinase/ protein kinase/ protein serine/threonine kinase/ transmembrane receptor protein kinase | chr1:24468932-24472329 FORWARD	1.345
signalling.receptor kinases.S-locus glycoprotein like	AT5G24080	protein kinase family protein | chr5:8139253-8141122 REVERSE	1.843
signalling.receptor kinases.wall associated kinase	AT1G16150	WAKL4 | WAKL4 (WALL ASSOCIATED KINASE-LIKE 4); kinase | chr1:5532415-5534877 FORWARD	1.727
signalling.receptor kinases.wall associated kinase	AT1G79680	wall-associated kinase, putative | chr1:29979973-29982773 REVERSE	1.299
signalling.receptor kinases.wall associated kinase	AT3G53840	protein kinase family protein | chr3:19945571-19947719 FORWARD	-1.487
signalling.receptor kinases.crinkly like	AT5G23170	protein kinase family protein | chr5:7798197-7799448 REVERSE	-1.499
signalling.receptor kinases.misc	AT1G51890	leucine-rich repeat protein kinase, putative | chr1:19274802-19278528 REVERSE	1.357
signalling.receptor kinases.misc	AT3G22060	receptor protein kinase-related | chr3:7771016-7772340 FORWARD	1.504
signalling.receptor kinases.misc	AT4G10390	protein kinase family protein | chr4:6441673-6443435 REVERSE	-1.007
signalling.receptor kinases.misc	AT5G01550	LECRKA4.2 | LECRKA4.2 (LECTIN RECEPTOR KINASE A4.1); ATP binding / kinase/ protein kinase/ protein serine/threonine kinase/ sugar binding | chr5:214517-216583 REVERSE	1.413
signalling.calcium	AT1G21550	calcium-binding protein, putative | chr1:7553101-7553876 REVERSE	1.931
signalling.calcium	AT2G15760	calmodulin-binding protein | chr2:6865610-6866877 REVERSE	-1.302
signalling.calcium	AT2G33380	RD20 | RD20 (RESPONSIVE TO DESSICATION 20); calcium ion binding | chr2:14144831-14146471 REVERSE	2.070
signalling.calcium	AT3G47480	calcium-binding EF hand family protein | chr3:17496354-17496947 REVERSE	1.092
signalling.calcium	AT3G59820	calcium-binding mitochondrial protein-related | chr3:22098028-22102086 REVERSE	-1.062
signalling.calcium	AT4G23060	IQD22 | IQD22 (IQ-domain 22); calmodulin binding | chr4:12087203-12090575 FORWARD	1.106
signalling.calcium	AT4G31000	calmodulin-binding protein | chr4:15103159-15105979 FORWARD	-1.038
signalling.calcium	AT4G38810	calcium-binding EF hand family protein | chr4:18115283-18119077 REVERSE	1.044
signalling.calcium	AT5G24270	SOS3, CBL4 | SOS3 (SALT OVERLY SENSITIVE 3); calcium ion binding / calcium-dependent protein serine/threonine phosphatase | chr5:8238781-8240366 REVERSE	-1.209
signalling.calcium	AT5G28830	calcium-binding EF hand family protein | chr5:10856791-10858668 FORWARD	1.182
signalling.calcium	AT5G39380	calmodulin-binding protein-related | chr5:15758717-15760686 REVERSE	-1.347
signalling.phosphinositides.phosphatidylinositol-4-phosphate 5-kinase	AT2G35170	MORN (Membrane Occupation and Recognition Nexus) repeat-containing protein /phosphatidylinositol-4-phosphate 5-kinase-related | chr2:14827463-14829802 FORWARD	1.165
signalling.phosphinositides.phosphoinositide phospholipase C	AT3G55940	phosphoinositide-specific phospholipase C, putative | chr3:20747787-20750184 FORWARD	1.173
signalling.G-proteins	AT1G02620	GTP-binding protein (SAR1A) | chr1:557092-557986 FORWARD	1.834
signalling.G-proteins	AT1G12070	Rho GDP-dissociation inhibitor family protein | chr1:4078913-4080106 REVERSE	-2.073
signalling.G-proteins	AT1G18200	AtRABA6b | AtRABA6b (Arabidopsis Rab GTPase homolog A6b); GTP binding / GTPase/ protein binding | chr1:6265416-6266937 REVERSE	1.907
signalling.G-proteins	AT4G35750	Rho-GTPase-activating protein-related | chr4:16940507-16941862 REVERSE	1.430
signalling.G-proteins	AT5G24390	RabGAP/TBC domain-containing protein | chr5:8326607-8329490 REVERSE	-1.796
signalling.G-proteins	AT5G60860	AtRABA1f | AtRABA1f (Arabidopsis Rab GTPase homolog A1f); GTP binding | chr5:24484622-24485705 FORWARD	1.313
signalling.14-3-3 proteins	AT1G34760	GRF11, GF14 OMICRON | GRF11 (GENERAL REGULATORY FACTOR 11); ATPase binding / amino acid binding / protein binding / protein phosphorylated amino acid binding | chr1:12743848-12745648 REVERSE	1.208
signalling.misc	AT2G48090	unknown protein | chr2:19669110-19669764 REVERSE	-1.943
signalling.lipids	AT1G55960	FUNCTIONS IN: molecular_function unknown; INVOLVED IN: biological_process unknown; EXPRESSED IN: 24 plant structures; EXPRESSED DURING: 15 growth stages; CONTAINS InterPro DOMAIN/s: Lipid-binding START (InterPro:IPR002913); BEST Arabidopsis thaliana protein match is: unknown protein (TAIR:AT3G13062.2); Has 177 Blast hits to 177 proteins in 41 species: Archae - 0; Bacteria - 0; Metazoa - 79; Fungi…	1.140
signalling.light	AT1G09570	PHYA, FHY2, FRE1, HY8 | PHYA (PHYTOCHROME A); G-protein coupled photoreceptor/ protein histidine kinase/ red or far-red light photoreceptor/ signal transducer | chr1:3095256-3100357 REVERSE	1.307
signalling.light	AT1G67900	phototropic-responsive NPH3 family protein | chr1:25467024-25470017 FORWARD	1.036
signalling.light	AT2G02710	PLP, PLPB | PLPB (PAS/LOV PROTEIN B); signal transducer/ two-component sensor | chr2:758693-760871 REVERSE	1.297
signalling.light	AT2G43010	PIF4, SRL2 | PIF4 (phytochrome interacting factor 4); DNA binding / protein binding / transcription factor | chr2:17886427-17889050 FORWARD	2.452
signalling.light	AT3G15570	phototropic-responsive NPH3 family protein | chr3:5269849-5271922 REVERSE	1.276
signalling.light	AT3G26740	CCL | CCL (CCR-LIKE) | chr3:9827801-9828680 FORWARD	2.499
signalling.light	AT3G50840	phototropic-responsive NPH3 family protein | chr3:18896175-18898621 REVERSE	1.548
signalling.light	AT4G14690	ELIP2 | ELIP2 (EARLY LIGHT-INDUCIBLE PROTEIN 2); chlorophyll binding | chr4:8418283-8419263 FORWARD	-2.643
signalling.light	AT5G64330	NPH3, RPT3, JK218 | NPH3 (NON-PHOTOTROPIC HYPOCOTYL 3); protein binding / signal transducer | chr5:25727337-25730358 FORWARD	1.084
Cell organization and cell cycle
cell.organisation	AT1G09170	kinesin motor protein-related | chr1:2956589-2962207 REVERSE	-2.49
cell.organisation	AT1G11740	ankyrin repeat family protein | chr1:3963277-3966824 REVERSE	-1.795
cell.organisation	AT2G33240	XID, ATXID | XID; motor/ protein binding | chr2:14086942-14096914 REVERSE	-1.606
cell.organisation	AT3G12110	ACT11 | ACT11 (actin-11); structural constituent of cytoskeleton | chr3:3857843-3859798 FORWARD	-1.06
cell.organisation	AT3G44730	kinesin motor protein-related | chr3:16285741-16291048 FORWARD	-1.042
cell.organisation	AT3G47690	ATEB1A, EB1A, ATEB1H2 | ATEB1A; microtubule binding | chr3:17581096-17583586 FORWARD	-1.445
cell.organisation	AT4G26700	ATFIM1, FIM1 | ATFIM1; actin binding | chr4:13463544-13467599 FORWARD	1.095
cell.organisation	AT4G34970	ADF9 | ADF9 (ACTIN DEPOLYMERIZING FACTOR 9); actin binding | chr4:16653704-16654871 FORWARD	1.106
cell.organisation	AT4G37010	CEN2 | caltractin, putative / centrin, putative | chr4:17444309-17445615 FORWARD	1.540
cell.organisation	AT5G54610	ANK | ANK (ankyrin); protein binding | chr5:22184779-22186525 REVERSE	1.413
cell.division	AT2G29680	CDC6, ATCDC6 | CDC6 (CELL DIVISION CONTROL 6) | chr2:12689581-12692872 FORWARD	1.658
cell.division	AT3G53830	regulator of chromosome condensation (RCC1) family protein / UVB-resistance protein-related | chr3:19940814-19943799 FORWARD	1.298
cell.cycle	AT3G21870	CYCP2;1 | CYCP2;1 (cyclin p2;1); cyclin-dependent protein kinase | chr3:7703866-7704829 REVERSE	1.316
cell.cycle	AT4G03270	CYCD6;1 | CYCD6;1 (Cyclin D6;1); cyclin-dependent protein kinase | chr4:1432375-1433691 REVERSE	-1.075
cell.vesicle transport	AT4G25850	ORP4B | ORP4B (OSBP(OXYSTEROL BINDING PROTEIN)-RELATED PROTEIN 4B); oxysterol binding | chr4:13143648-13146930 FORWARD	1.800
Micro RNA-involving processes
micro RNA, natural antisense etc	AT2G01008	other RNA | chr2:1871-2111 FORWARD	1.877
Development
development.storage proteins	AT2G26560	PLP2, PLA IIA, PLA2A | PLA2A (PHOSPHOLIPASE A 2A); lipase/ nutrient reservoir | chr2:11293769-11295806 REVERSE	1.727
development.storage proteins	AT3G22640	PAP85 | PAP85; nutrient reservoir | chr3:8011724-8013902 REVERSE	4.668
development.storage proteins	AT5G04040	SDP1 | SDP1 (SUGAR-DEPENDENT1); triacylglycerol lipase | chr5:1089342-1093179 FORWARD	1.001
development.late embryogenesis abundant	AT1G01470	LEA14, LSR3 | LEA14 (LATE EMBRYOGENESIS ABUNDANT 14) | chr1:172146-172948 REVERSE	1.168
development.late embryogenesis abundant	AT2G41280	M10, ATM10 | M10 | chr2:17209697-17210423 FORWARD	1.757
development.late embryogenesis abundant	AT5G06760	late embryogenesis abundant group 1 domain-containing protein / LEA group 1 domain-containing protein | chr5:2089492-2090430 REVERSE	2.359
development.squamosa promoter binding like (SPL)	AT1G02065	SPL8 | SPL8 (SQUAMOSA PROMOTER BINDING PROTEIN-LIKE 8); DNA binding | chr1:365209-367340 FORWARD	-3.03
development.squamosa promoter binding like (SPL)	AT5G43270	SPL2 | SPL2 (SQUAMOSA PROMOTER BINDING PROTEIN-LIKE 2); DNA binding / transcription factor | chr5:17360305-17363773 REVERSE	-1.062
development.unspecified	AT1G07050	CONSTANS-like protein-related | chr1:2164188-2165239 REVERSE	-2.987
development.unspecified	AT1G11450	nodulin MtN21 family protein | chr1:3853467-3855385 FORWARD	-1.264
development.unspecified	AT1G20120	family II extracellular lipase, putative | chr1:6975388-6977264 FORWARD	-1.428
development.unspecified	AT1G21890	nodulin MtN21 family protein | chr1:7682584-7685662 REVERSE	-1.495
development.unspecified	AT1G22770	GI, FB | GI (GIGANTEA) | chr1:8061844-8067716 FORWARD	2.274
development.unspecified	AT1G29400	AML5 | AML5 (ARABIDOPSIS MEI2-LIKE PROTEIN 5); RNA binding / nucleic acid binding / nucleotide binding | chr1:10290040-10294478 REVERSE	1.089
development.unspecified	AT1G32510	anac011 | anac011 (Arabidopsis NAC domain containing protein 11); transcription factor | chr1:11757000-11758118 FORWARD	-3.046
development.unspecified	AT1G52890	ANAC019 | ANAC019 (Arabidopsis NAC domain containing protein 19); transcription factor | chr1:19697004-19698482 REVERSE	1.564
development.unspecified	AT1G53230	TCP3 | TCP3; transcription factor | chr1:19849788-19851725 REVERSE	-2.27
development.unspecified	AT1G56220	dormancy/auxin associated family protein | chr1:21043349-21044738 FORWARD	1.0
development.unspecified	AT1G69120	AP1, AGL7 | AP1 (APETALA1); DNA binding / protein binding / protein heterodimerization/ transcription activator/ transcription factor | chr1:25982330-25986313 REVERSE	-3.645
development.unspecified	AT1G69490	NAP, ANAC029, ATNAP | NAP (NAC-like, activated by AP3/PI); transcription factor | chr1:26122139-26123421 FORWARD	2.099
development.unspecified	AT1G79760	DTA4 | DTA4 (DOWNSTREAM TARGET OF AGL15-4) | chr1:30012048-30013495 FORWARD	-1.162
development.unspecified	AT2G17230	EXL5 | EXL5 (EXORDIUM LIKE 5) | chr2:7494536-7496016 REVERSE	-1.457
development.unspecified	AT2G17840	ERD7 | ERD7 (EARLY-RESPONSIVE TO DEHYDRATION 7) | chr2:7755605-7757852 REVERSE	1.496
development.unspecified	AT2G34925	CLE42 | CLE42 (CLAVATA3/ESR-RELATED 42) | chr2:14734270-14734536 FORWARD	-1.259
development.unspecified	AT2G39510	nodulin MtN21 family protein | chr2:16491143-16493151 REVERSE	-2.139
development.unspecified	AT2G44670	senescence-associated protein-related | chr2:18425180-18426060 FORWARD	-1.373
development.unspecified	AT3G02310	SEP2, AGL4 | SEP2 (SEPALLATA 2); DNA binding / protein binding / transcription factor | chr3:464279-467074 REVERSE	-4.85
development.unspecified	AT3G04070	anac047 | anac047 (Arabidopsis NAC domain containing protein 47); transcription factor | chr3:1061526-1063103 REVERSE	1.122
development.unspecified	AT3G14770	nodulin MtN3 family protein | chr3:4957334-4959704 REVERSE	1.029
development.unspecified	AT3G28455	CLE25 | CLE25 (CLAVATA3/ESR-RELATED 25); protein binding / receptor binding | chr3:10669888-10671163 REVERSE	-1.394
development.unspecified	AT3G29035	ATNAC3, ANAC059 | ATNAC3 (ARABIDOPSIS NAC DOMAIN CONTAINING PROTEIN 3); protein heterodimerization/ transcription factor | chr3:11033665-11035308 FORWARD	1.363
development.unspecified	AT3G45600	TET3 | TET3 (TETRASPANIN3) | chr3:16733755-16735951 REVERSE	1.004
development.unspecified	AT3G49620	DIN11 | DIN11 (DARK INDUCIBLE 11); iron ion binding / oxidoreductase | chr3:18393747-18396816 FORWARD	3.787
development.unspecified	AT3G54340	AP3, ATAP3 | AP3 (APETALA 3); DNA binding / transcription factor | chr3:20119173-20121170 REVERSE	-3.096
development.unspecified	AT4G13345	MEE55 | MEE55 (maternal effect embryo arrest 55) | chr4:7765073-7769688 FORWARD	-1.245
development.unspecified	AT4G17670	senescence-associated protein-related | chr4:9833661-9834727 REVERSE	-1.331
development.unspecified	AT4G19450	nodulin-related | chr4:10606453-10609335 FORWARD	-1.088
development.unspecified	AT4G27410	RD26 | RD26 (RESPONSIVE TO DESICCATION 26); transcription activator/ transcription factor | chr4:13707900-13709013 REVERSE	2.330
development.unspecified	AT4G28040	nodulin MtN21 family protein | chr4:13940359-13942309 FORWARD	1.490
development.unspecified	AT4G35770	SEN1, ATSEN1, DIN1 | SEN1 (SENESCENCE 1) | chr4:16944941-16946192 FORWARD	2.881
development.unspecified	AT4G35783	RTFL6, DVL17 | RTFL6 (ROTUNDIFOLIA LIKE 6) | chr4:16952406-16952800 FORWARD	-1.142
development.unspecified	AT4G36710	transcription factor | chr4:17305758-17307643 FORWARD	-1.132
development.unspecified	AT5G15800	SEP1, AGL2 | SEP1 (SEPALLATA1); DNA binding / transcription factor | chr5:5151334-5154154 REVERSE	-1.427
development.unspecified	AT5G15840	CO, FG | CO (CONSTANS); transcription factor/ transcription regulator/ zinc ion binding | chr5:5171182-5172758 REVERSE	-2.58
development.unspecified	AT5G20240	PI | PI (PISTILLATA); DNA binding / transcription factor | chr5:6829042-6831515 FORWARD	-1.426
development.unspecified	AT5G21150	PAZ domain-containing protein / piwi domain-containing protein | chr5:7192239-7198324 FORWARD	-1.412
development.unspecified	AT5G22290	anac089 | anac089 (Arabidopsis NAC domain containing protein 89); transcription factor | chr5:7375923-7377644 REVERSE	1.072
development.unspecified	AT5G23660	MTN3 | MTN3 (Arabidopsis homolog of Medicago truncatula MTN3) | chr5:7971651-7973925 REVERSE	-1.478
development.unspecified	AT5G39610	ATNAC2, ORE1, ANAC092, ATNAC6 | ATNAC6 (ARABIDOPSIS NAC DOMAIN CONTAINING PROTEIN 6); protein heterodimerization/ protein homodimerization/ transcription factor | chr5:15858400-15859788 REVERSE	2.105
development.unspecified	AT5G45830	DOG1, GSQ5 | DOG1 (DELAY OF GERMINATION 1) | chr5:18589482-18591400 REVERSE	2.899
development.unspecified	AT5G47060	senescence-associated protein-related | chr5:19116788-19118046 FORWARD	-1.062
development.unspecified	AT5G48850	ATSDI1 | ATSDI1 (SULPHUR DEFICIENCY-INDUCED 1); binding | chr5:19805437-19807759 REVERSE	-2.086
development.unspecified	AT5G50790	nodulin MtN3 family protein | chr5:20656253-20658001 REVERSE	-3.017
development.unspecified	AT5G63420	emb2746 | emb2746 (embryo defective 2746); DNA binding / catalytic/ hydrolase | chr5:25400386-25405968 FORWARD	-1.087
development.unspecified	AT5G64060	anac103 | anac103 (Arabidopsis NAC domain containing protein 103); transcription factor | chr5:25633536-25635781 REVERSE	-1.292
development.unspecified	AT5G65040	senescence-associated protein-related | chr5:25977621-25978417 REVERSE	-1.659
development.unspecified	AT5G65510	AIL7 | AIL7 (AINTEGUMENTA-like 7); DNA binding / transcription factor | chr5:26185829-26189413 FORWARD	-1.374
Transport
transport.p- and v-ATPases	AT1G79450	ALIS5 | ALIS5 (ALA-Interacting Subunit 5) | chr1:29887692-29890145 FORWARD	1.147
transport.sugars	AT1G08890	sugar transporter family protein | chr1:2848348-2852270 FORWARD	1.199
transport.sugars	AT1G11260	STP1, ATSTP1 | STP1 (SUGAR TRANSPORTER 1); carbohydrate transmembrane transporter/ sugar:hydrogen symporter | chr1:3777328-3780337 FORWARD	1.813
transport.sugars	AT1G77210	sugar transporter, putative | chr1:29008939-29011090 REVERSE	1.325
transport.sugars	AT2G22730	transporter-related | chr2:9660964-9664133 FORWARD	-1.005
transport.sugars	AT3G20460	sugar transporter, putative | chr3:7135050-7139472 FORWARD	-2.138
transport.sugars	AT3G51490	TMT3 | TMT3 (TONOPLAST MONOSACCHARIDE TRANSPORTER3); carbohydrate transmembrane transporter/ nucleoside transmembrane transporter/ sugar:hydrogen symporter | chr3:19105018-19107562 REVERSE	-1.564
transport.sugars	AT4G36670	mannitol transporter, putative | chr4:17287499-17289590 REVERSE	2.348
transport.sugars	AT5G26340	MSS1, STP13 | MSS1; carbohydrate transmembrane transporter/ hexose:hydrogen symporter/ high-affinity hydrogen:glucose symporter/ sugar:hydrogen symporter | chr5:9243511-9247066 REVERSE	2.209
transport.amino acids	AT2G41190	amino acid transporter family protein | chr2:17167279-17170407 REVERSE	1.303
transport.amino acids	AT3G54830	amino acid transporter family protein | chr3:20311901-20315030 REVERSE	1.844
transport.amino acids	AT3G56200	amino acid transporter family protein | chr3:20850029-20852027 FORWARD	-1.474
transport.amino acids	AT4G21120	AAT1, CAT1 | AAT1 (AMINO ACID TRANSPORTER 1); L-glutamate transmembrane transporter/ L-lysine transmembrane transporter/ arginine transmembrane transporter/ cationic amino acid transmembrane transporter | chr4:11270045-11273973 FORWARD	1.432
transport.nitrate	AT5G60780	ATNRT2.3, NRT2.3 | ATNRT2.3; nitrate transmembrane transporter | chr5:24450839-24452756 FORWARD	-1.351
transport.phosphate	AT1G69480	EXS family protein / ERD1/XPR1/SYG1 family protein | chr1:26114112-26117479 REVERSE	1.423
transport.metabolite transporters at the mitochondrial membrane	AT1G12480	OZS1, SLAC1, RCD3, CDI3 | OZS1 (OZONE-SENSITIVE 1); transporter | chr1:4257268-4259300 REVERSE	1.595
transport.metabolite transporters at the mitochondrial membrane	AT1G18320	mitochondrial import inner membrane translocase subunit Tim17/Tim22/Tim23 family protein | chr1:6304360-6305689 FORWARD	-1.232
transport.metabolite transporters at the mitochondrial membrane	AT1G64220	TOM7-2 | TOM7-2 (TRANSLOCASE OF OUTER MEMBRANE 7 KDA SUBUNIT 2); P-P-bond-hydrolysis-driven protein transmembrane transporter | chr1:23833088-23833321 REVERSE	-1.663
transport.metabolite transporters at the mitochondrial membrane	AT3G53940	mitochondrial substrate carrier family protein | chr3:19971019-19973769 REVERSE	-1.153
transport.metabolite transporters at the mitochondrial membrane	AT3G62650	unknown protein | chr3:23168061-23169187 FORWARD	1.130
transport.nucleotides	AT4G18195	ATPUP8, PUP8 | PUP8 (ARABIDOPSIS THALIANA PURINE PERMEASE 8); purine transmembrane transporter | chr4:10069694-10071115 FORWARD	-1.206
transport.metal	AT1G15960	NRAMP6, ATNRAMP6 | NRAMP6; inorganic anion transmembrane transporter/ metal ion transmembrane transporter | chr1:5481665-5485082 REVERSE	-1.19
transport.metal	AT1G79520	cation efflux family protein | chr1:29912252-29914614 REVERSE	1.371
transport.metal	AT3G12750	ZIP1 | ZIP1 (ZINC TRANSPORTER 1 PRECURSOR); zinc ion transmembrane transporter | chr3:4051651-4053201 REVERSE	-1.221
transport.peptides and oligopeptides	AT2G02020	proton-dependent oligopeptide transport (POT) family protein | chr2:479101-481185 FORWARD	-2.141
transport.peptides and oligopeptides	AT3G27020	YSL6 | YSL6 (YELLOW STRIPE LIKE 6); oligopeptide transporter | chr3:9961319-9964597 REVERSE	1.055
transport.peptides and oligopeptides	AT5G46050	ATPTR3, PTR3 | PTR3 (PEPTIDE TRANSPORTER 3); dipeptide transporter/ transporter/ tripeptide transporter | chr5:18675035-18679146 REVERSE	1.150
transport.peptides and oligopeptides	AT5G62730	proton-dependent oligopeptide transport (POT) family protein | chr5:25197494-25200033 FORWARD	-3.654
transport.unspecified cations	AT4G05110	ATENT6, ENT6 | equilibrative nucleoside transporter, putative (ENT6) | chr4:2626405-2628830 REVERSE	-1.302
transport.unspecified cations	AT4G05130	ATENT4, ENT4 | equilibrative nucleoside transporter, putative (ENT4) | chr4:2636875-2638965 REVERSE	-1.554
transport.unspecified cations	AT5G26220	ChaC-like family protein | chr5:9162969-9164685 REVERSE	-1.378
transport.unspecified cations	AT5G47560	ATTDT, ATSDAT, TDT | TDT (TONOPLAST DICARBOXYLATE TRANSPORTER); malate transmembrane transporter/ sodium:dicarboxylate symporter | chr5:19287369-19290465 REVERSE	1.303
transport.potassium	AT2G24240	potassium channel tetramerisation domain-containing protein | chr2:10310648-10312328 FORWARD	1.779
transport.ABC transporters and multidrug resistance systems	AT1G31770	ABC transporter family protein | chr1:11374893-11377794 REVERSE	-1.674
transport.ABC transporters and multidrug resistance systems	AT3G28345	ABC transporter family protein | chr3:10593753-10598775 REVERSE	-1.102
transport.ABC transporters and multidrug resistance systems	AT3G52310	ABC transporter family protein | chr3:19399378-19402953 FORWARD	1.373
transport.unspecified anions	AT3G27170	CLC-B, ATCLC-B | CLC-B (CHLORIDE CHANNEL B); anion channel/ voltage-gated chloride channel | chr3:10024017-10027198 FORWARD	1.701
transport.unspecified anions	AT4G32510	anion exchanger | chr4:15685822-15688811 REVERSE	-2.163
transport.Major Intrinsic Proteins.PIP	AT2G37170	PIP2B, PIP2;2 | PIP2B (PLASMA MEMBRANE INTRINSIC PROTEIN 2); water channel | chr2:15613402-15614857 REVERSE	1.360
transport.Major Intrinsic Proteins.PIP	AT2G37180	RD28, PIP2;3, PIP2C | RD28 (RESPONSIVE TO DESICCATION 28); water channel | chr2:15617708-15619155 FORWARD	1.553
transport.Major Intrinsic Proteins.PIP	AT2G39010	PIP2E, PIP2;6 | PIP2E (PLASMA MEMBRANE INTRINSIC PROTEIN 2E); water channel | chr2:16291477-16294034 FORWARD	1.301
transport.Major Intrinsic Proteins.PIP	AT3G61430	PIP1A, ATPIP1, PIP1, PIP1;1 | PIP1A (PLASMA MEMBRANE INTRINSIC PROTEIN 1A); water channel | chr3:22733474-22735335 FORWARD	1.274
transport.Major Intrinsic Proteins.TIP	AT4G17340	TIP2;2, DELTA-TIP2 | TIP2;2 (TONOPLAST INTRINSIC PROTEIN 2;2); water channel | chr4:9699253-9700410 FORWARD	2.512
transport.Major Intrinsic Proteins.TIP	AT5G47450	ATTIP2;3, TIP2;3, DELTA-TIP3 | AtTIP2;3; ammonia transporter/ methylammonium transmembrane transporter/ water channel | chr5:19248249-19249504 REVERSE	2.625
transport.porins	AT1G50400	porin family protein | chr1:18668155-18670546 FORWARD	-2.01
transport.calcium	AT5G17860	CAX7 | CAX7 (calcium exchanger 7); calcium:sodium antiporter/ cation:cation antiporter | chr5:5902394-5904380 REVERSE	1.242
transport.calcium	AT5G57110	ACA8, AT-ACA8 | ACA8 (AUTOINHIBITED CA2+ -ATPASE, ISOFORM 8); calcium-transporting ATPase/ calmodulin binding / protein self-association | chr5:23109438-23117544 REVERSE	-1.024
transport.misc	AT1G22530	PATL2 | PATL2 (PATELLIN 2); transporter | chr1:7955493-7958442 REVERSE	-1.163
transport.misc	AT1G66780	MATE efflux family protein | chr1:24909213-24911485 FORWARD	1.426
transport.misc	AT1G76530	auxin efflux carrier family protein | chr1:28718379-28720371 FORWARD	-1.813
transport.misc	AT2G34360	antiporter/ drug transporter/ transporter | chr2:14507294-14510231 FORWARD	-1.036
transport.misc	AT5G17700	MATE efflux family protein | chr5:5830581-5833901 REVERSE	-1.033
Not assigned
not assigned.no ontology	AT1G03820	unknown protein | chr1:959869-960728 REVERSE	-1.0
not assigned.no ontology	AT1G13635	methyladenine glycosylase family protein | chr1:4674247-4675851 FORWARD	-1.533
not assigned.no ontology	AT1G14880	unknown protein | chr1:5132535-5133716 REVERSE	1.830
not assigned.no ontology	AT1G18830	transducin family protein / WD-40 repeat family protein | chr1:6489309-6494218 FORWARD	1.867
not assigned.no ontology	AT1G21670	INVOLVED IN: proteolysis; LOCATED IN: cell wall, plant-type cell wall; EXPRESSED IN: 23 plant structures; EXPRESSED DURING: 14 growth stages; CONTAINS InterPro DOMAIN/s: WD40-like Beta Propeller (InterPro:IPR011659), Peptidase S9B, dipeptidylpeptidase IV N-terminal (InterPro:IPR002469), Six-bladed beta-propeller, TolB-like (InterPro:IPR011042); BEST Arabidopsis thaliana protein match is: unknown …	1.354
not assigned.no ontology	AT1G21680	FUNCTIONS IN: molecular_function unknown; INVOLVED IN: biological_process unknown; LOCATED IN: plasma membrane, vacuole, plant-type cell wall; EXPRESSED IN: 25 plant structures; EXPRESSED DURING: 13 growth stages; CONTAINS InterPro DOMAIN/s: WD40-like Beta Propeller (InterPro:IPR011659), Six-bladed beta-propeller, TolB-like (InterPro:IPR011042); BEST Arabidopsis thaliana protein match is: unknown…	1.123
not assigned.no ontology	AT1G24147	unknown protein | chr1:8542446-8543474 FORWARD	1.419
not assigned.no ontology	AT1G29395	COR414-TM1 | COR414-TM1 | chr1:10288197-10289621 REVERSE	1.975
not assigned.no ontology	AT1G73480	hydrolase, alpha/beta fold family protein | chr1:27628939-27632806 FORWARD	2.818
not assigned.no ontology	AT2G18328	ATRL4 | ATRL4 (ARABIDOPSIS RAD-LIKE 4); DNA binding | chr2:7964393-7964909 FORWARD	-1.527
not assigned.no ontology	AT2G32150	haloacid dehalogenase-like hydrolase family protein | chr2:13659006-13660764 FORWARD	1.468
not assigned.no ontology	AT2G32487	unknown protein | chr2:13791887-13793177 FORWARD	-1.017
not assigned.no ontology	AT2G38310	unknown protein | chr2:16050063-16051168 FORWARD	-1.863
not assigned.no ontology	AT2G46750	FAD-binding domain-containing protein | chr2:19208320-19210958 REVERSE	1.041
not assigned.no ontology	AT2G48080	oxidoreductase, 2OG-Fe(II) oxygenase family protein | chr2:19664990-19667092 REVERSE	-2.482
not assigned.no ontology	AT3G20395	protein binding / zinc ion binding | chr3:7111948-7113870 REVERSE	1.182
not assigned.no ontology	AT3G24420	hydrolase, alpha/beta fold family protein | chr3:8862840-8864914 REVERSE	1.164
not assigned.no ontology	AT3G28220	meprin and TRAF homology domain-containing protein / MATH domain-containing protein | chr3:10524404-10526728 FORWARD	1.264
not assigned.no ontology	AT3G29240	unknown protein | chr3:11191491-11192986 FORWARD	1.021
not assigned.no ontology	AT3G44860	FAMT | FAMT (farnesoic acid carboxyl-O-methyltransferase); S-adenosylmethionine-dependent methyltransferase/ farnesoic acid O-methyltransferase | chr3:16379633-16381070 FORWARD	2.160
not assigned.no ontology	AT3G48390	MA3 domain-containing protein | chr3:17920815-17923496 FORWARD	2.152
not assigned.no ontology	AT3G50810	unknown protein | chr3:18888868-18890101 REVERSE	-1.319
not assigned.no ontology	AT3G57200	unknown protein | chr3:21169265-21172316 FORWARD	-1.193
not assigned.no ontology	AT3G61028	unknown protein | chr3:22582750-22584880 REVERSE	1.832
not assigned.no ontology	AT3G62860	esterase/lipase/thioesterase family protein | chr3:23239446-23242251 REVERSE	1.035
not assigned.no ontology	AT4G20000	VQ motif-containing protein | chr4:10838310-10839142 FORWARD	1.208
not assigned.no ontology	AT4G25070	unknown protein | chr4:12872482-12876734 FORWARD	1.687
not assigned.no ontology	AT4G25580	stress-responsive protein-related | chr4:13056184-13058802 FORWARD	1.317
not assigned.no ontology	AT4G36850	INVOLVED IN: biological_process unknown; LOCATED IN: membrane; CONTAINS InterPro DOMAIN/s: Cystinosin/ERS1p repeat (InterPro:IPR006603); BEST Arabidopsis thaliana protein match is: PQ-loop repeat family protein / transmembrane family protein (TAIR:AT2G41050.1); Has 599 Blast hits to 441 proteins in 106 species: Archae - 0; Bacteria - 0; Metazoa - 197; Fungi - 311; Plants - 38; Viruses - 0; Other …	2.300
not assigned.no ontology	AT4G37220	stress-responsive protein, putative | chr4:17515080-17516162 FORWARD	2.950
not assigned.no ontology	AT4G37608	unknown protein | chr4:17668951-17670631 FORWARD	-1.323
not assigned.no ontology	AT5G05365	metal ion binding | chr5:1590036-1590861 FORWARD	-1.646
not assigned.no ontology	AT5G06570	hydrolase | chr5:2007990-2011041 REVERSE	1.430
not assigned.no ontology	AT5G41900	hydrolase, alpha/beta fold family protein | chr5:16768953-16771696 FORWARD	1.583
not assigned.no ontology	AT5G44780	unknown protein | chr5:18068060-18070654 FORWARD	-1.024
not assigned.no ontology	AT5G52882	ATP binding / nucleoside-triphosphatase/ nucleotide binding | chr5:21433879-21438659 REVERSE	-1.199
not assigned.no ontology	AT5G58770	dehydrodolichyl diphosphate synthase, putative / DEDOL-PP synthase, putative | chr5:23734376-23735634 FORWARD	1.196
not assigned.no ontology	AT5G64170	dentin sialophosphoprotein-related | chr5:25672466-25676746 REVERSE	1.924
not assigned.no ontology.agenet domain-containing protein	AT1G26540	agenet domain-containing protein | chr1:9167589-9170934 REVERSE	-1.142
not assigned.no ontology.pentatricopeptide (PPR) repeat-containing protein	AT1G09410	pentatricopeptide (PPR) repeat-containing protein | chr1:3035443-3037560 FORWARD	-1.021
not assigned.no ontology.pentatricopeptide (PPR) repeat-containing protein	AT1G13800	pentatricopeptide (PPR) repeat-containing protein | chr1:4731056-4733707 REVERSE	-1.088
not assigned.no ontology.pentatricopeptide (PPR) repeat-containing protein	AT1G68930	pentatricopeptide (PPR) repeat-containing protein | chr1:25918314-25920545 FORWARD	-1.035
not assigned.no ontology.pentatricopeptide (PPR) repeat-containing protein	AT1G74900	OTP43 | OTP43 (organelle transcript processing defect 43) | chr1:28133933-28135667 FORWARD	-1.197
not assigned.no ontology.pentatricopeptide (PPR) repeat-containing protein	AT2G20540	pentatricopeptide (PPR) repeat-containing protein | chr2:8844160-8845764 FORWARD	-1.025
not assigned.no ontology.pentatricopeptide (PPR) repeat-containing protein	AT2G22070	pentatricopeptide (PPR) repeat-containing protein | chr2:9383602-9386064 FORWARD	-1.027
not assigned.no ontology.pentatricopeptide (PPR) repeat-containing protein	AT2G27610	pentatricopeptide (PPR) repeat-containing protein | chr2:11783927-11786533 REVERSE	-1.425
not assigned.no ontology.pentatricopeptide (PPR) repeat-containing protein	AT3G21470	pentatricopeptide (PPR) repeat-containing protein | chr3:7563608-7565248 FORWARD	-1.177
not assigned.no ontology.pentatricopeptide (PPR) repeat-containing protein	AT3G49170	EMB2261 | EMB2261 (embryo defective 2261) | chr3:18226911-18229610 REVERSE	-1.045
not assigned.no ontology.pentatricopeptide (PPR) repeat-containing protein	AT4G33170	pentatricopeptide (PPR) repeat-containing protein | chr4:15995701-15998673 REVERSE	-1.034
not assigned.no ontology.pentatricopeptide (PPR) repeat-containing protein	AT4G38010	pentatricopeptide (PPR) repeat-containing protein | chr4:17859582-17861261 REVERSE	-1.056
not assigned.no ontology.pentatricopeptide (PPR) repeat-containing protein	AT5G08490	pentatricopeptide (PPR) repeat-containing protein | chr5:2745208-2747757 REVERSE	-1.294
not assigned.no ontology.pentatricopeptide (PPR) repeat-containing protein	AT5G13230	pentatricopeptide (PPR) repeat-containing protein | chr5:4222514-4224982 FORWARD	-1.052
not assigned.no ontology.pentatricopeptide (PPR) repeat-containing protein	AT5G27110	pentatricopeptide (PPR) repeat-containing protein | chr5:9538572-9540647 REVERSE	-1.321
not assigned.no ontology.pentatricopeptide (PPR) repeat-containing protein	AT5G37570	pentatricopeptide (PPR) repeat-containing protein | chr5:14924494-14926146 REVERSE	-1.248
not assigned.no ontology.C2 domain-containing protein	AT4G00700	C2 domain-containing protein | chr4:286051-289514 FORWARD	1.492
not assigned.no ontology.DC1 domain containing protein	AT1G55380	DC1 domain-containing protein | chr1:20676622-20678607 REVERSE	-1.305
not assigned.no ontology.DC1 domain containing protein	AT2G17740	DC1 domain-containing protein | chr2:7706896-7707861 REVERSE	1.376
not assigned.no ontology.DC1 domain containing protein	AT3G11402	DC1 domain-containing protein | chr3:3573516-3575642 FORWARD	-1.06
not assigned.no ontology.DC1 domain containing protein	AT3G13760	DC1 domain-containing protein | chr3:4517517-4519475 FORWARD	-3.076
not assigned.no ontology.glycine rich proteins	AT3G06780	glycine-rich protein | chr3:2143488-2144521 FORWARD	1.014
not assigned.no ontology.glycine rich proteins	AT5G07560	GRP20, ATGRP20 | GRP20 (GLYCINE-RICH PROTEIN 20); lipid binding / nutrient reservoir | chr5:2390207-2391075 REVERSE	-5.15
not assigned.no ontology.hydroxyproline rich proteins	AT1G10790	FUNCTIONS IN: molecular_function unknown; INVOLVED IN: biological_process unknown; LOCATED IN: cellular_component unknown; BEST Arabidopsis thaliana protein match is: hydroxyproline-rich glycoprotein family protein (TAIR:AT3G56590.2); Has 40 Blast hits to 40 proteins in 7 species: Archae - 0; Bacteria - 0; Metazoa - 0; Fungi - 0; Plants - 40; Viruses - 0; Other Eukaryotes - 0 (source: NCBI BLink)…	-3.655
not assigned.no ontology.hydroxyproline rich proteins	AT1G15825	hydroxyproline-rich glycoprotein family protein | chr1:5448149-5448529 REVERSE	1.164
not assigned.no ontology.hydroxyproline rich proteins	AT1G70985	hydroxyproline-rich glycoprotein family protein | chr1:26764672-26765285 REVERSE	-1.179
not assigned.no ontology.hydroxyproline rich proteins	AT5G21280	hydroxyproline-rich glycoprotein family protein | chr5:7263994-7265678 REVERSE	1.083
not assigned.no ontology.proline rich family	AT4G16140	proline-rich family protein | chr4:9129016-9129841 FORWARD	-1.369
not assigned.no ontology.proline rich family	AT4G27850	proline-rich family protein | chr4:13870382-13873509 FORWARD	-2.416
not assigned.no ontology.proline rich family	AT5G19810	proline-rich extensin-like family protein | chr5:6693052-6693801 FORWARD	3.074
not assigned.no ontology.proline rich family	AT5G61090	nucleic acid binding | chr5:24574902-24577714 REVERSE	-1.154
not assigned.unknown	AT1G01240	unknown protein | chr1:99922-101834 FORWARD	1.203
not assigned.unknown	AT1G01500	unknown protein | chr1:185133-186923 FORWARD	1.551
not assigned.unknown	AT1G02700	unknown protein | chr1:588329-589480 FORWARD	-2.18
not assigned.unknown	AT1G03610	unknown protein | chr1:900887-903003 FORWARD	1.190
not assigned.unknown	AT1G07040	unknown protein | chr1:2160938-2163308 REVERSE	1.364
not assigned.unknown	AT1G07280	binding | chr1:2238087-2241217 FORWARD	1.034
not assigned.unknown	AT1G09470	unknown protein | chr1:3055231-3056974 REVERSE	-1.114
not assigned.unknown	AT1G10140	FUNCTIONS IN: molecular_function unknown; INVOLVED IN: biological_process unknown; LOCATED IN: plasma membrane; EXPRESSED IN: 23 plant structures; EXPRESSED DURING: 13 growth stages; CONTAINS InterPro DOMAIN/s: Uncharacterised conserved protein UCP031279 (InterPro:IPR016972); BEST Arabidopsis thaliana protein match is: unknown protein (TAIR:AT1G58420.1); Has 38 Blast hits to 38 proteins in 10 spe…	1.540
not assigned.unknown	AT1G11210	unknown protein | chr1:3755677-3756998 REVERSE	2.012
not assigned.unknown	AT1G11220	unknown protein | chr1:3759862-3761165 REVERSE	-1.049
not assigned.unknown	AT1G13340	unknown protein | chr1:4569448-4571118 REVERSE	1.979
not assigned.unknown	AT1G13470	unknown protein | chr1:4620228-4621580 REVERSE	1.264
not assigned.unknown	AT1G13530	unknown protein | chr1:4633740-4635129 REVERSE	2.882
not assigned.unknown	AT1G13990	unknown protein | chr1:4794756-4796594 FORWARD	1.145
not assigned.unknown	AT1G14780	FUNCTIONS IN: molecular_function unknown; INVOLVED IN: biological_process unknown; LOCATED IN: cellular_component unknown; EXPRESSED IN: 13 plant structures; EXPRESSED DURING: 6 growth stages; CONTAINS InterPro DOMAIN/s: Membrane attack complex component/perforin/complement C9 (InterPro:IPR001862); BEST Arabidopsis thaliana protein match is: unknown protein (TAIR:AT4G24290.2); Has 119 Blast hits …	1.194
not assigned.unknown	AT1G15010	unknown protein | chr1:5171207-5171742 FORWARD	1.715
not assigned.unknown	AT1G15760	FUNCTIONS IN: molecular_function unknown; INVOLVED IN: biological_process unknown; LOCATED IN: cellular_component unknown; CONTAINS InterPro DOMAIN/s: Sterile alpha motif homology (InterPro:IPR010993); BEST Arabidopsis thaliana protein match is: unknown protein (TAIR:AT1G80520.1); Has 30 Blast hits to 30 proteins in 7 species: Archae - 0; Bacteria - 0; Metazoa - 0; Fungi - 0; Plants - 30; Viruses…	-1.24
not assigned.unknown	AT1G15830	unknown protein | chr1:5448726-5450177 FORWARD	1.146
not assigned.unknown	AT1G15840	unknown protein | chr1:5451432-5452374 FORWARD	1.738
not assigned.unknown	AT1G16850	unknown protein | chr1:5764807-5765651 REVERSE	1.089
not assigned.unknown	AT1G17090	unknown protein | chr1:5842216-5842882 REVERSE	-1.138
not assigned.unknown	AT1G17665	unknown protein | chr1:6072598-6074484 REVERSE	-1.824
not assigned.unknown	AT1G19400	unknown protein | chr1:6712038-6714247 REVERSE	1.045
not assigned.unknown	AT1G19530	unknown protein | chr1:6763915-6764971 FORWARD	2.013
not assigned.unknown	AT1G20530	unknown protein | chr1:7108370-7110377 REVERSE	-1.98
not assigned.unknown	AT1G21360	GLTP2 | GLTP2 (glycolipid transfer protein 2); glycolipid binding / glycolipid transporter | chr1:7481252-7483507 FORWARD	1.229
not assigned.unknown	AT1G21790	FUNCTIONS IN: molecular_function unknown; INVOLVED IN: biological_process unknown; LOCATED IN: integral to membrane; EXPRESSED IN: 23 plant structures; EXPRESSED DURING: 15 growth stages; CONTAINS InterPro DOMAIN/s: TRAM, LAG1 and CLN8 homology (InterPro:IPR006634); Has 127 Blast hits to 127 proteins in 26 species: Archae - 0; Bacteria - 0; Metazoa - 84; Fungi - 0; Plants - 41; Viruses - 0; Other…	1.014
not assigned.unknown	AT1G23340	unknown protein | chr1:8283896-8286832 REVERSE	-1.16
not assigned.unknown	AT1G23530	unknown protein | chr1:8345595-8346651 FORWARD	-1.308
not assigned.unknown	AT1G24145	unknown protein | chr1:8541027-8541739 FORWARD	1.512
not assigned.unknown	AT1G25400	unknown protein | chr1:8911130-8912398 REVERSE	1.459
not assigned.unknown	AT1G26945	KDR | KDR (KIDARI); transcription regulator | chr1:9351454-9352761 FORWARD	1.345
not assigned.unknown	AT1G28260	INVOLVED IN: biological_process unknown; LOCATED IN: cellular_component unknown; EXPRESSED IN: 21 plant structures; EXPRESSED DURING: 13 growth stages; BEST Arabidopsis thaliana protein match is: SMG7 (TAIR:AT5G19400.1); Has 341 Blast hits to 340 proteins in 87 species: Archae - 0; Bacteria - 0; Metazoa - 225; Fungi - 71; Plants - 35; Viruses - 0; Other Eukaryotes - 10 (source: NCBI BLink). | chr…	1.551
not assigned.unknown	AT1G30250	unknown protein | chr1:10646987-10647511 REVERSE	1.546
not assigned.unknown	AT1G30260	FUNCTIONS IN: molecular_function unknown; INVOLVED IN: response to cytokinin stimulus; EXPRESSED IN: 18 plant structures; EXPRESSED DURING: 10 growth stages; BEST Arabidopsis thaliana protein match is: galactosyltransferase family protein (TAIR:AT4G21060.1); Has 16 Blast hits to 16 proteins in 5 species: Archae - 0; Bacteria - 0; Metazoa - 0; Fungi - 0; Plants - 16; Viruses - 0; Other Eukaryotes …	1.219
not assigned.unknown	AT1G30515	unknown protein | chr1:10809289-10809915 REVERSE	-1.322
not assigned.unknown	AT1G31720	unknown protein | chr1:11356102-11357081 FORWARD	-1.608
not assigned.unknown	AT1G31835	unknown protein | chr1:11423059-11423684 REVERSE	-1.313
not assigned.unknown	AT1G33055	unknown protein | chr1:11972240-11972590 REVERSE	2.088
not assigned.unknown	AT1G42430	unknown protein | chr1:15891375-15894444 FORWARD	2.170
not assigned.unknown	AT1G45545	unknown protein | chr1:17180615-17182957 REVERSE	-1.727
not assigned.unknown	AT1G47395	unknown protein | chr1:17383034-17383408 FORWARD	-1.169
not assigned.unknown	AT1G47400	unknown protein | chr1:17385717-17386186 FORWARD	-1.253
not assigned.unknown	AT1G49000	unknown protein | chr1:18123459-18124165 REVERSE	1.002
not assigned.unknown	AT1G49500	unknown protein | chr1:18321808-18322284 REVERSE	2.667
not assigned.unknown	AT1G52827	unknown protein | chr1:19671448-19671922 REVERSE	1.235
not assigned.unknown	AT1G52855	unknown protein | chr1:19682946-19683498 REVERSE	1.856
not assigned.unknown	AT1G54120	unknown protein | chr1:20207020-20207540 FORWARD	1.205
not assigned.unknown	AT1G55980	electron carrier/ oxidoreductase | chr1:20938899-20941813 REVERSE	1.982
not assigned.unknown	AT1G56080	unknown protein | chr1:20974161-20976291 REVERSE	-1.194
not assigned.unknown	AT1G60060	unknown protein | chr1:22139184-22141790 FORWARD	-1.097
not assigned.unknown	AT1G61930	unknown protein | chr1:22893101-22893976 FORWARD	-2.045
not assigned.unknown	AT1G62225	unknown protein | chr1:22989550-22990341 REVERSE	-2.347
not assigned.unknown	AT1G62420	unknown protein | chr1:23102793-23104647 REVERSE	1.504
not assigned.unknown	AT1G62870	unknown protein | chr1:23284012-23286760 REVERSE	-1.236
not assigned.unknown	AT1G64700	unknown protein | chr1:24039810-24040595 REVERSE	-1.012
not assigned.unknown	AT1G67920	unknown protein | chr1:25473544-25474140 FORWARD	1.359
not assigned.unknown	AT1G69260	AFP1 | AFP1 (ABI FIVE BINDING PROTEIN) | chr1:26039048-26040720 FORWARD	2.421
not assigned.unknown	AT1G71110	unknown protein | chr1:26818083-26821004 FORWARD	-1.064
not assigned.unknown	AT1G71850	ubiquitin thiolesterase | chr1:27024732-27026363 REVERSE	-1.095
not assigned.unknown	AT1G73750	EXPRESSED IN: 22 plant structures; EXPRESSED DURING: 13 growth stages; CONTAINS InterPro DOMAIN/s: Uncharacterised conserved protein UCP031088, alpha/beta hydrolase, At1g15070 (InterPro:IPR016969); BEST Arabidopsis thaliana protein match is: unknown protein (TAIR:AT1G15060.1); Has 121 Blast hits to 101 proteins in 28 species: Archae - 0; Bacteria - 44; Metazoa - 8; Fungi - 0; Plants - 61; Viruses…	1.558
not assigned.unknown	AT1G76870	FUNCTIONS IN: molecular_function unknown; INVOLVED IN: biological_process unknown; LOCATED IN: cellular_component unknown; EXPRESSED IN: 16 plant structures; EXPRESSED DURING: 11 growth stages; BEST Arabidopsis thaliana protein match is: transcription factor (TAIR:AT1G21200.1); Has 324 Blast hits to 269 proteins in 64 species: Archae - 0; Bacteria - 2; Metazoa - 125; Fungi - 12; Plants - 63; Viru…	-1.337
not assigned.unknown	AT1G77765	unknown protein | chr1:29245050-29246237 FORWARD	1.722
not assigned.unknown	AT1G79770	unknown protein | chr1:30014361-30015078 FORWARD	-1.419
not assigned.unknown	AT2G04795	unknown protein | chr2:1682953-1683475 FORWARD	-1.233
not assigned.unknown	AT2G07599	unknown protein; BEST Arabidopsis thaliana protein match is: unknown protein (TAIR:ATMG01040.1).	1.392
not assigned.unknown	AT2G12462	unknown protein | chr2:5050434-5051613 REVERSE	-1.139
not assigned.unknown	AT2G14095	unknown protein | chr2:5932383-5933791 REVERSE	-2.534
not assigned.unknown	AT2G15890	MEE14 | MEE14 (maternal effect embryo arrest 14) | chr2:6920369-6922025 REVERSE	1.914
not assigned.unknown	AT2G15960	unknown protein | chr2:6947309-6947688 FORWARD	1.208
not assigned.unknown	AT2G20480	unknown protein | chr2:8830565-8831533 REVERSE	-1.344
not assigned.unknown	AT2G20670	unknown protein | chr2:8911860-8913534 REVERSE	1.133
not assigned.unknown	AT2G21820	unknown protein | chr2:9302885-9303247 REVERSE	1.496
not assigned.unknown	AT2G22080	unknown protein | chr2:9386516-9388183 FORWARD	1.089
not assigned.unknown	AT2G23040	unknown protein | chr2:9807893-9809209 REVERSE	-1.059
not assigned.unknown	AT2G24440	selenium binding | chr2:10391089-10392828 FORWARD	-1.026
not assigned.unknown	AT2G25200	unknown protein | chr2:10736483-10737654 REVERSE	2.009
not assigned.unknown	AT2G25770	unknown protein | chr2:10992808-10993652 FORWARD	-1.631
not assigned.unknown	AT2G27385	unknown protein | chr2:11716496-11717330 REVERSE	1.231
not assigned.unknown	AT2G27402	FUNCTIONS IN: molecular_function unknown; INVOLVED IN: biological_process unknown; LOCATED IN: cellular_component unknown; BEST Arabidopsis thaliana protein match is: PTAC18 (PLASTID TRANSCRIPTIONALLY ACTIVE 18) (TAIR:AT2G32180.1); Has 15 Blast hits to 15 proteins in 3 species: Archae - 0; Bacteria - 0; Metazoa - 0; Fungi - 0; Plants - 15; Viruses - 0; Other Eukaryotes - 0 (source: NCBI BLink). |…	-1.082
not assigned.unknown	AT2G27740	unknown protein | chr2:11822732-11823732 FORWARD	-1.209
not assigned.unknown	AT2G27830	FUNCTIONS IN: molecular_function unknown; EXPRESSED IN: 22 plant structures; EXPRESSED DURING: 13 growth stages; BEST Arabidopsis thaliana protein match is: pentatricopeptide (PPR) repeat-containing protein (TAIR:AT4G22760.1); Has 68 Blast hits to 68 proteins in 11 species: Archae - 0; Bacteria - 0; Metazoa - 0; Fungi - 0; Plants - 68; Viruses - 0; Other Eukaryotes - 0 (source: NCBI BLink). | chr…	1.140
not assigned.unknown	AT2G29670	binding | chr2:12681958-12685087 REVERSE	2.658
not assigned.unknown	AT2G30010	INVOLVED IN: biological_process unknown; EXPRESSED IN: 22 plant structures; EXPRESSED DURING: 13 growth stages; CONTAINS InterPro DOMAIN/s: Protein of unknown function DUF231, plant (InterPro:IPR004253); BEST Arabidopsis thaliana protein match is: PMR5 (POWDERY MILDEW RESISTANT 5) (TAIR:AT5G58600.1); Has 709 Blast hits to 698 proteins in 16 species: Archae - 0; Bacteria - 0; Metazoa - 0; Fungi - …	-1.19
not assigned.unknown	AT2G30766	unknown protein | chr2:13108007-13108470 FORWARD	-1.954
not assigned.unknown	AT2G31945	unknown protein | chr2:13581581-13582126 FORWARD	1.178
not assigned.unknown	AT2G32160	FUNCTIONS IN: molecular_function unknown; INVOLVED IN: biological_process unknown; LOCATED IN: cellular_component unknown; EXPRESSED IN: 19 plant structures; EXPRESSED DURING: 13 growth stages; CONTAINS InterPro DOMAIN/s: N2227-like (InterPro:IPR012901); BEST Arabidopsis thaliana protein match is: unknown protein (TAIR:AT2G32170.1); Has 328 Blast hits to 321 proteins in 142 species: Archae - 0; B…	1.687
not assigned.unknown	AT2G33175	unknown protein | chr2:14062754-14063275 REVERSE	-3.713
not assigned.unknown	AT2G34220	MEE20 | MEE20 (maternal effect embryo arrest 20) | chr2:14450536-14453856 FORWARD	-1.869
not assigned.unknown	AT2G34240	CONTAINS InterPro DOMAIN/s: Protein of unknown function DUF627 (InterPro:IPR006866), Protein of unknown function DUF629 (InterPro:IPR006865); BEST Arabidopsis thaliana protein match is: MEE20 (maternal effect embryo arrest 20) (TAIR:AT2G34220.1). | chr2:14459157-14461802 FORWARD	-1.197
not assigned.unknown	AT2G35070	unknown protein | chr2:14783291-14784710 FORWARD	1.997
not assigned.unknown	AT2G35950	EDA12 | EDA12 (embryo sac development arrest 12) | chr2:15104761-15106088 FORWARD	1.151
not assigned.unknown	AT2G37380	unknown protein | chr2:15686758-15688003 FORWARD	-1.091
not assigned.unknown	AT2G38465	unknown protein | chr2:16106263-16106913 REVERSE	-1.698
not assigned.unknown	AT2G38500	FUNCTIONS IN: molecular_function unknown; INVOLVED IN: biological_process unknown; EXPRESSED IN: 7 plant structures; EXPRESSED DURING: L mature pollen stage, M germinated pollen stage, 4 anthesis, petal differentiation and expansion stage; BEST Arabidopsis thaliana protein match is: DTA4 (DOWNSTREAM TARGET OF AGL15-4) (TAIR:AT1G79760.1); Has 26 Blast hits to 26 proteins in 5 species: Archae - 0; …	1.032
not assigned.unknown	AT2G38640	unknown protein | chr2:16157604-16158561 REVERSE	1.073
not assigned.unknown	AT2G40085	unknown protein | chr2:16736461-16737259 REVERSE	-1.105
not assigned.unknown	AT2G40435	EXPRESSED IN: 20 plant structures; EXPRESSED DURING: 13 growth stages; BEST Arabidopsis thaliana protein match is: transcription regulator (TAIR:AT3G56220.1); Has 165 Blast hits to 165 proteins in 20 species: Archae - 0; Bacteria - 0; Metazoa - 0; Fungi - 0; Plants - 165; Viruses - 0; Other Eukaryotes - 0 (source: NCBI BLink). | chr2:16886824-16888638 FORWARD	1.025
not assigned.unknown	AT2G40710	FUNCTIONS IN: molecular_function unknown; INVOLVED IN: biological_process unknown; LOCATED IN: endomembrane system, integral to membrane; EXPRESSED IN: male gametophyte, pollen tube; EXPRESSED DURING: L mature pollen stage, M germinated pollen stage; CONTAINS InterPro DOMAIN/s: Hly-III related (InterPro:IPR004254); BEST Arabidopsis thaliana protein match is: HHP4 (heptahelical protein 4); recepto…	-2.815
not assigned.unknown	AT2G42110	unknown protein | chr2:17562152-17562733 REVERSE	-1.3
not assigned.unknown	AT2G42870	PAR1, HLH1 | PAR1 (PHY RAPIDLY REGULATED 1) | chr2:17836416-17837250 REVERSE	1.064
not assigned.unknown	AT2G44000	FUNCTIONS IN: molecular_function unknown; INVOLVED IN: biological_process unknown; LOCATED IN: cellular_component unknown; CONTAINS InterPro DOMAIN/s: Harpin-induced 1 (InterPro:IPR010847); BEST Arabidopsis thaliana protein match is: unknown protein (TAIR:AT1G64065.1); Has 34 Blast hits to 34 proteins in 4 species: Archae - 0; Bacteria - 0; Metazoa - 0; Fungi - 0; Plants - 34; Viruses - 0; Other …	-2.069
not assigned.unknown	AT2G45600	hydrolase | chr2:18789588-18790952 FORWARD	1.251
not assigned.unknown	AT2G46550	unknown protein | chr2:19111989-19114173 REVERSE	1.063
not assigned.unknown	AT2G47360	unknown protein | chr2:19437800-19438871 FORWARD	-3.586
not assigned.unknown	AT2G47485	unknown protein | chr2:19485875-19486553 FORWARD	1.754
not assigned.unknown	AT3G01940	unknown protein | chr3:322831-323053 REVERSE	-1.525
not assigned.unknown	AT3G02410	INVOLVED IN: biological_process unknown; LOCATED IN: cellular_component unknown; CONTAINS InterPro DOMAIN/s: Carboxylesterase, type B (InterPro:IPR002018); BEST Arabidopsis thaliana protein match is: ATPCME (PRENYLCYSTEINE METHYLESTERASE); prenylcysteine methylesterase (TAIR:AT5G15860.1); Has 6563 Blast hits to 6539 proteins in 837 species: Archae - 25; Bacteria - 2499; Metazoa - 2507; Fungi - 39…	-1.056
not assigned.unknown	AT3G02800	phosphatase/ phosphoprotein phosphatase/ protein tyrosine phosphatase | chr3:606471-607886 REVERSE	-1.123
not assigned.unknown	AT3G03341	unknown protein | chr3:790130-790648 REVERSE	1.696
not assigned.unknown	AT3G03870	unknown protein | chr3:995217-997410 FORWARD	1.132
not assigned.unknown	AT3G05936	unknown protein | chr3:1773832-1774589 REVERSE	1.497
not assigned.unknown	AT3G06145	unknown protein | chr3:1859924-1860650 REVERSE	-1.094
not assigned.unknown	AT3G06435	Expressed protein | chr3:1969121-1970784 REVERSE	-1.758
not assigned.unknown	AT3G06600	unknown protein | chr3:2059431-2060483 REVERSE	-1.561
not assigned.unknown	AT3G07350	unknown protein | chr3:2347468-2348791 FORWARD	1.866
not assigned.unknown	AT3G09450	unknown protein | chr3:2907548-2910091 FORWARD	-1.091
not assigned.unknown	AT3G10020	unknown protein | chr3:3091043-3091766 REVERSE	2.390
not assigned.unknown	AT3G10880	unknown protein | chr3:3405815-3407434 FORWARD	-1.141
not assigned.unknown	AT3G11000	EXPRESSED IN: 9 plant structures; EXPRESSED DURING: 6 growth stages; CONTAINS InterPro DOMAIN/s: Development and cell death domain (InterPro:IPR013989), Kelch related (InterPro:IPR013089); BEST Arabidopsis thaliana protein match is: unknown protein (TAIR:AT5G01660.1). | chr3:3447568-3450589 FORWARD	-1.099
not assigned.unknown	AT3G11680	unknown protein | chr3:3686995-3689329 REVERSE	-3.371
not assigned.unknown	AT3G12320	unknown protein | chr3:3923735-3925465 FORWARD	1.231
not assigned.unknown	AT3G12870	unknown protein | chr3:4094417-4095037 REVERSE	-1.256
not assigned.unknown	AT3G13980	unknown protein | chr3:4619038-4620262 REVERSE	1.073
not assigned.unknown	AT3G15357	unknown protein | chr3:5187116-5187710 FORWARD	-1.368
not assigned.unknown	AT3G15518	unknown protein | chr3:5249112-5249754 FORWARD	1.034
not assigned.unknown	AT3G16330	unknown protein | chr3:5535196-5536063 FORWARD	-1.821
not assigned.unknown	AT3G18250	unknown protein | chr3:6258067-6258417 REVERSE	1.829
not assigned.unknown	AT3G18530	binding | chr3:6373535-6375723 REVERSE	1.617
not assigned.unknown	AT3G19250	FUNCTIONS IN: molecular_function unknown; INVOLVED IN: biological_process unknown; LOCATED IN: cellular_component unknown; CONTAINS InterPro DOMAIN/s: Protein of unknown function DUF677 (InterPro:IPR007749); BEST Arabidopsis thaliana protein match is: polyadenylate-binding protein-related / PABP-related (TAIR:AT3G19330.1); Has 55 Blast hits to 55 proteins in 6 species: Archae - 0; Bacteria - 0; M…	-1.263
not assigned.unknown	AT3G20760	FUNCTIONS IN: molecular_function unknown; INVOLVED IN: biological_process unknown; LOCATED IN: cellular_component unknown; EXPRESSED IN: sperm cell, cotyledon; CONTAINS InterPro DOMAIN/s: Nse4 (InterPro:IPR014854); BEST Arabidopsis thaliana protein match is: unknown protein (TAIR:AT1G51130.1); Has 190 Blast hits to 190 proteins in 77 species: Archae - 0; Bacteria - 4; Metazoa - 67; Fungi - 72; Pl…	-1.156
not assigned.unknown	AT3G21710	unknown protein | chr3:7648359-7649799 FORWARD	1.259
not assigned.unknown	AT3G22090	unknown protein | chr3:7782912-7783561 FORWARD	2.643
not assigned.unknown	AT3G26050	FUNCTIONS IN: molecular_function unknown; INVOLVED IN: biological_process unknown; LOCATED IN: chloroplast; EXPRESSED IN: 11 plant structures; EXPRESSED DURING: 6 growth stages; CONTAINS InterPro DOMAIN/s: Targeting for Xklp2 (InterPro:IPR009675); BEST Arabidopsis thaliana protein match is: unknown protein (TAIR:AT3G27350.1); Has 5651 Blast hits to 1894 proteins in 233 species: Archae - 0; Bacter…	-1.056
not assigned.unknown	AT3G29575	AFP3 | AFP3 (ABI FIVE BINDING PROTEIN 3) | chr3:11382214-11384004 REVERSE	2.001
not assigned.unknown	AT3G41762	unknown protein.	-1.811
not assigned.unknown	AT3G42725	unknown protein | chr3:14842900-14843707 REVERSE	-1.336
not assigned.unknown	AT3G43850	unknown protein | chr3:15702085-15704152 REVERSE	1.995
not assigned.unknown	AT3G44960	unknown protein | chr3:16427795-16429151 FORWARD	-1.148
not assigned.unknown	AT3G47295	unknown protein | chr3:17427950-17428511 FORWARD	1.059
not assigned.unknown	AT3G49570	LSU3 | LSU3 (RESPONSE TO LOW SULFUR 3) | chr3:18372533-18373024 REVERSE	-1.905
not assigned.unknown	AT3G51230	unknown protein | chr3:19023221-19024351 REVERSE	-1.218
not assigned.unknown	AT3G52240	unknown protein | chr3:19372714-19375880 REVERSE	1.045
not assigned.unknown	AT3G55240	Overexpression leads to PEL (Pseudo-Etiolation in Light) phenotype. | chr3:20473541-20474763 REVERSE	2.622
not assigned.unknown	AT3G55646	unknown protein | chr3:20644896-20646655 FORWARD	-1.415
not assigned.unknown	AT3G58770	unknown protein | chr3:21732258-21735327 FORWARD	-1.151
not assigned.unknown	AT3G60890	ZPR2 | ZPR2 (LITTLE ZIPPER 2); protein binding | chr3:22497024-22497475 REVERSE	-1.84
not assigned.unknown	AT3G61920	unknown protein | chr3:22932496-22933362 REVERSE	-1.739
not assigned.unknown	AT3G62070	unknown protein | chr3:22983138-22984513 REVERSE	1.018
not assigned.unknown	AT3G63160	unknown protein | chr3:23333513-23334034 REVERSE	-1.748
not assigned.unknown	AT4G01026	unknown protein | chr4:447052-448511 FORWARD	1.824
not assigned.unknown	AT4G01670	unknown protein | chr4:711192-712643 REVERSE	1.486
not assigned.unknown	AT4G04330	unknown protein | chr4:2116553-2118597 REVERSE	-1.698
not assigned.unknown	AT4G05070	unknown protein | chr4:2593595-2594119 REVERSE	1.239
not assigned.unknown	AT4G06534	unknown protein | chr4:3356870-3358087 FORWARD	2.366
not assigned.unknown	AT4G06536	FUNCTIONS IN: molecular_function unknown; INVOLVED IN: biological_process unknown; LOCATED IN: cellular_component unknown; CONTAINS InterPro DOMAIN/s: B302 (SPRY)-like (InterPro:IPR001870), SPla/RYanodine receptor SPRY (InterPro:IPR003877); Has 20 Blast hits to 20 proteins in 9 species: Archae - 0; Bacteria - 0; Metazoa - 0; Fungi - 7; Plants - 11; Viruses - 0; Other Eukaryotes - 2 (source: NCBI …	2.623
not assigned.unknown	AT4G07940	unknown protein | chr4:4792673-4794109 FORWARD	-2.904
not assigned.unknown	AT4G09970	unknown protein | chr4:6245983-6247768 FORWARD	-1.03
not assigned.unknown	AT4G10910	unknown protein | chr4:6696712-6697455 FORWARD	4.243
not assigned.unknown	AT4G12690	unknown protein | chr4:7480807-7481870 FORWARD	1.067
not assigned.unknown	AT4G13690	unknown protein | chr4:7953352-7955769 REVERSE	-1.133
not assigned.unknown	AT4G14270	Protein containing PAM2 motif which mediates interaction with the PABC domain of polyadenyl binding proteins. | chr4:8218378-8219229 FORWARD	1.288
not assigned.unknown	AT4G14380	unknown protein | chr4:8285766-8286772 FORWARD	-1.386
not assigned.unknown	AT4G15990	unknown protein | chr4:9061269-9061676 REVERSE	1.235
not assigned.unknown	AT4G16000	unknown protein | chr4:9063845-9064481 REVERSE	2.018
not assigned.unknown	AT4G16162	protein binding | chr4:9159283-9161614 REVERSE	1.042
not assigned.unknown	AT4G18422	unknown protein | chr4:10176150-10176590 REVERSE	-1.517
not assigned.unknown	AT4G19430	unknown protein | chr4:10598445-10599151 REVERSE	-3.961
not assigned.unknown	AT4G21215	unknown protein | chr4:11310385-11313709 REVERSE	1.080
not assigned.unknown	AT4G21310	unknown protein | chr4:11339048-11340070 REVERSE	-1.283
not assigned.unknown	AT4G21780	unknown protein | chr4:11567130-11567699 FORWARD	-1.203
not assigned.unknown	AT4G23870	unknown protein | chr4:12414230-12415049 FORWARD	1.039
not assigned.unknown	AT4G25990	CIL | CIL | chr4:13191690-13193543 REVERSE	-1.192
not assigned.unknown	AT4G26950	unknown protein | chr4:13533564-13534159 REVERSE	-1.245
not assigned.unknown	AT4G27510	unknown protein | chr4:13746176-13749031 REVERSE	-1.134
not assigned.unknown	AT4G27580	unknown protein | chr4:13765661-13766597 REVERSE	3.430
not assigned.unknown	AT4G28703	FUNCTIONS IN: molecular_function unknown; LOCATED IN: cellular_component unknown; EXPRESSED IN: 6 plant structures; EXPRESSED DURING: 4 anthesis, F mature embryo stage, petal differentiation and expansion stage, D bilateral stage, E expanded cotyledon stage; CONTAINS InterPro DOMAIN/s: Cupin, RmlC-type (InterPro:IPR011051), Protein of unknown function DUF861, cupin-3 (InterPro:IPR008579), RmlC-li…	1.402
not assigned.unknown	AT4G29905	unknown protein | chr4:14627064-14627430 REVERSE	1.736
not assigned.unknown	AT4G31360	selenium binding | chr4:15221843-15223627 FORWARD	-1.035
not assigned.unknown	AT4G31730	GDU1 | GDU1 (GLUTAMINE DUMPER 1) | chr4:15361091-15361850 FORWARD	-1.007
not assigned.unknown	AT4G33666	unknown protein | chr4:16169048-16169535 FORWARD	1.206
not assigned.unknown	AT4G33960	unknown protein | chr4:16277366-16277779 FORWARD	1.784
not assigned.unknown	AT4G33980	unknown protein | chr4:16282796-16285058 REVERSE	-2.144
not assigned.unknown	AT4G34550	FUNCTIONS IN: molecular_function unknown; INVOLVED IN: biological_process unknown; LOCATED IN: cellular_component unknown; BEST Arabidopsis thaliana protein match is: F-box family protein (TAIR:AT2G16365.3); Has 23 Blast hits to 23 proteins in 4 species: Archae - 0; Bacteria - 0; Metazoa - 0; Fungi - 0; Plants - 23; Viruses - 0; Other Eukaryotes - 0 (source: NCBI BLink). | chr4:16503201-16504040 …	-3.453
not assigned.unknown	AT4G34560	unknown protein | chr4:16507635-16508754 FORWARD	-1.034
not assigned.unknown	AT4G35190	unknown protein | chr4:16746599-16748266 FORWARD	-1.554
not assigned.unknown	AT4G37300	MEE59 | MEE59 (maternal effect embryo arrest 59) | chr4:17554641-17555861 FORWARD	1.235
not assigned.unknown	AT4G39675	unknown protein | chr4:18413775-18414240 FORWARD	1.877
not assigned.unknown	AT5G02020	unknown protein | chr5:386018-388123 REVERSE	3.874
not assigned.unknown	AT5G02580	unknown protein | chr5:579852-580787 FORWARD	1.598
not assigned.unknown	AT5G03230	unknown protein | chr5:769514-770385 FORWARD	1.331
not assigned.unknown	AT5G03995	unknown protein | chr5:1077483-1078304 REVERSE	-1.079
not assigned.unknown	AT5G05965	unknown protein | chr5:1790788-1792634 REVERSE	1.396
not assigned.unknown	AT5G06610	unknown protein | chr5:2029897-2033723 FORWARD	-1.291
not assigned.unknown	AT5G06980	unknown protein | chr5:2167536-2169391 FORWARD	1.351
not assigned.unknown	AT5G06990	unknown protein | chr5:2169602-2170606 FORWARD	1.214
not assigned.unknown	AT5G08240	unknown protein | chr5:2650837-2652398 REVERSE	1.038
not assigned.unknown	AT5G09580	unknown protein | chr5:2972639-2974776 FORWARD	-1.175
not assigned.unknown	AT5G10210	FUNCTIONS IN: molecular_function unknown; INVOLVED IN: biological_process unknown; LOCATED IN: cellular_component unknown; EXPRESSED IN: hypocotyl, root; CONTAINS InterPro DOMAIN/s: C2 calcium-dependent membrane targeting (InterPro:IPR000008); BEST Arabidopsis thaliana protein match is: unknown protein (TAIR:AT5G65030.1); Has 11 Blast hits to 11 proteins in 5 species: Archae - 0; Bacteria - 0; Me…	2.106
not assigned.unknown	AT5G10625	FUNCTIONS IN: molecular_function unknown; INVOLVED IN: biological_process unknown; LOCATED IN: cellular_component unknown; BEST Arabidopsis thaliana protein match is: FPF1 (FLOWERING PROMOTING FACTOR 1) (TAIR:AT5G24860.1); Has 61 Blast hits to 61 proteins in 8 species: Archae - 0; Bacteria - 0; Metazoa - 0; Fungi - 0; Plants - 61; Viruses - 0; Other Eukaryotes - 0 (source: NCBI BLink). | chr5:335…	1.197
not assigned.unknown	AT5G16030	unknown protein | chr5:5238178-5240748 FORWARD	1.013
not assigned.unknown	AT5G18130	unknown protein | chr5:5995480-5997498 FORWARD	1.838
not assigned.unknown	AT5G19190	unknown protein | chr5:6457260-6458031 FORWARD	1.017
not assigned.unknown	AT5G19380	unknown protein | chr5:6526807-6530592 REVERSE	-1.022
not assigned.unknown	AT5G20790	unknown protein | chr5:7039911-7040654 REVERSE	-1.917
not assigned.unknown	AT5G22270	unknown protein | chr5:7372233-7373102 REVERSE	1.603
not assigned.unknown	AT5G22310	unknown protein | chr5:7383629-7385734 REVERSE	1.539
not assigned.unknown	AT5G22390	unknown protein | chr5:7418116-7419249 REVERSE	1.394
not assigned.unknown	AT5G22430	unknown protein | chr5:7433790-7434935 FORWARD	-3.832
not assigned.unknown	AT5G22930	unknown protein | chr5:7668229-7669315 REVERSE	-1.581
not assigned.unknown	AT5G23100	unknown protein | chr5:7753434-7754759 FORWARD	-1.025
not assigned.unknown	AT5G24105	AGP41 | AGP41 (ARABINOGALACTAN-PROTEIN 41) | chr5:8151924-8152867 FORWARD	-2.159
not assigned.unknown	AT5G24280	EXPRESSED IN: 17 plant structures; EXPRESSED DURING: 6 growth stages; BEST Arabidopsis thaliana protein match is: DMS3 (DEFECTIVE IN MERISTEM SILENCING 3) (TAIR:AT3G49250.1); Has 61 Blast hits to 57 proteins in 12 species: Archae - 0; Bacteria - 2; Metazoa - 8; Fungi - 2; Plants - 46; Viruses - 0; Other Eukaryotes - 3 (source: NCBI BLink). | chr5:8251378-8261428 REVERSE	-1.09
not assigned.unknown	AT5G24600	unknown protein | chr5:8421629-8423480 REVERSE	-1.161
not assigned.unknown	AT5G24660	LSU2 | LSU2 (RESPONSE TO LOW SULFUR 2) | chr5:8443279-8443834 REVERSE	-1.576
not assigned.unknown	AT5G26730	FUNCTIONS IN: molecular_function unknown; INVOLVED IN: biological_process unknown; LOCATED IN: mitochondrion; CONTAINS InterPro DOMAIN/s: FAS1 domain (InterPro:IPR000782); BEST Arabidopsis thaliana protein match is: unknown protein (TAIR:AT5G16920.1); Has 15 Blast hits to 15 proteins in 4 species: Archae - 0; Bacteria - 0; Metazoa - 0; Fungi - 0; Plants - 15; Viruses - 0; Other Eukaryotes - 0 (so…	-2.909
not assigned.unknown	AT5G26790	unknown protein | chr5:9423092-9423611 FORWARD	-1.299
not assigned.unknown	AT5G28910	unknown protein | chr5:10930586-10932999 REVERSE	-1.592
not assigned.unknown	AT5G35732	unknown protein | chr5:13897940-13898387 FORWARD	-1.559
not assigned.unknown	AT5G37300	WSD1 | WSD1; diacylglycerol O-acyltransferase/ long-chain-alcohol O-fatty-acyltransferase | chr5:14767499-14770249 FORWARD	-1.625
not assigned.unknown	AT5G37550	unknown protein | chr5:14918901-14919868 REVERSE	-1.679
not assigned.unknown	AT5G38200	hydrolase | chr5:15256276-15258755 FORWARD	1.220
not assigned.unknown	AT5G39520	unknown protein | chr5:15823735-15825492 REVERSE	1.868
not assigned.unknown	AT5G40500	unknown protein | chr5:16227834-16228693 FORWARD	1.096
not assigned.unknown	AT5G41590	unknown protein | chr5:16632086-16633896 REVERSE	2.808
not assigned.unknown	AT5G42530	unknown protein | chr5:17004738-17005393 REVERSE	1.143
not assigned.unknown	AT5G42610	unknown protein | chr5:17062480-17064047 FORWARD	-3.507
not assigned.unknown	AT5G43150	unknown protein | chr5:17325013-17325923 FORWARD	1.188
not assigned.unknown	AT5G43240	unknown protein | chr5:17352986-17355122 REVERSE	-1.892
not assigned.unknown	AT5G44575	unknown protein | chr5:17973838-17974998 FORWARD	1.936
not assigned.unknown	AT5G44585	unknown protein | chr5:17984616-17985473 FORWARD	1.765
not assigned.unknown	AT5G46140	unknown protein | chr5:18704997-18706708 REVERSE	-2.361
not assigned.unknown	AT5G46440	FUNCTIONS IN: molecular_function unknown; INVOLVED IN: biological_process unknown; LOCATED IN: endomembrane system; BEST Arabidopsis thaliana protein match is: pentatricopeptide (PPR) repeat-containing protein (TAIR:AT5G46460.1); Has 6 Blast hits to 6 proteins in 2 species: Archae - 0; Bacteria - 0; Metazoa - 0; Fungi - 0; Plants - 6; Viruses - 0; Other Eukaryotes - 0 (source: NCBI BLink). | chr5…	-1.408
not assigned.unknown	AT5G47440	phosphoinositide binding | chr5:19243531-19245350 REVERSE	1.451
not assigned.unknown	AT5G49525	unknown protein | chr5:20097040-20097486 REVERSE	1.813
not assigned.unknown	AT5G50335	unknown protein | chr5:20489094-20489727 REVERSE	1.354
not assigned.unknown	AT5G51390	unknown protein | chr5:20877967-20878464 REVERSE	1.479
not assigned.unknown	AT5G51920	catalytic/ pyridoxal phosphate binding | chr5:21097106-21098959 REVERSE	-1.429
not assigned.unknown	AT5G52900	unknown protein | chr5:21452442-21453808 REVERSE	1.071
not assigned.unknown	AT5G53390	unknown protein | chr5:21656734-21659262 REVERSE	-3.624
not assigned.unknown	AT5G53710	unknown protein | chr5:21805259-21805794 REVERSE	3.491
not assigned.unknown	AT5G53880	unknown protein | chr5:21872794-21873303 REVERSE	-1.053
not assigned.unknown	AT5G54165	unknown protein | chr5:21984569-21984964 FORWARD	1.821
not assigned.unknown	AT5G54585	unknown protein | chr5:22175539-22176691 FORWARD	2.101
not assigned.unknown	AT5G55010	unknown protein | chr5:22321900-22322229 FORWARD	-1.508
not assigned.unknown	AT5G56050	FUNCTIONS IN: molecular_function unknown; INVOLVED IN: biological_process unknown; LOCATED IN: chloroplast; CONTAINS InterPro DOMAIN/s: Harpin-induced 1 (InterPro:IPR010847); BEST Arabidopsis thaliana protein match is: unknown protein (TAIR:AT4G26490.1); Has 322 Blast hits to 322 proteins in 28 species: Archae - 0; Bacteria - 8; Metazoa - 10; Fungi - 1; Plants - 299; Viruses - 2; Other Eukaryotes…	-1.271
not assigned.unknown	AT5G56550	OXS3, ATOXS3 | OXS3 (OXIDATIVE STRESS 3) | chr5:22895616-22896653 REVERSE	1.025
not assigned.unknown	AT5G58630	unknown protein | chr5:23696108-23697452 REVERSE	-1.307
not assigned.unknown	AT5G59080	unknown protein | chr5:23847405-23848557 REVERSE	1.562
not assigned.unknown	AT5G60680	unknown protein | chr5:24386145-24386976 FORWARD	1.584
not assigned.unknown	AT5G60840	unknown protein | chr5:24473319-24474491 REVERSE	1.244
not assigned.unknown	AT5G62140	unknown protein | chr5:24954506-24955385 REVERSE	-1.106
not assigned.unknown	AT5G62280	unknown protein | chr5:25017073-25018246 FORWARD	1.096
not assigned.unknown	AT5G63350	unknown protein | chr5:25380000-25381183 REVERSE	1.957
not assigned.unknown	AT5G64190	unknown protein | chr5:25679432-25681265 FORWARD	1.211
not assigned.unknown	AT5G65207	unknown protein | chr5:26052245-26052644 REVERSE	2.161
not assigned.unknown	AT5G65609	unknown protein | chr5:26219163-26219345 REVERSE	1.206
not assigned.unknown	AT5G66052	unknown protein | chr5:26416232-26416466 FORWARD	-1.197
